# Supplementary material for: A mitotic recombination map proximal to the APC locus on chromosome 5q and assessment of influences on colorectal cancer risk
Source: PubMed Central journal article supplement (PMC2705358; doi:10.1186/1471-2350-10-54), 2009-06-10
Supplement: 1471-2350-10-54-S1.pdf [file 1471-2350-10-54-S1.pdf]

Additional file 1. Fine mapping of mitotic recombination breakpoints close to chr5:68-71Mb in selected colorectal cancer cell lines.

The Table shows the allele sizes (bp) at a number of polymorphic markers on proximal chromosome 5q in 6 colorectal cancer cell lines.

Alleles of different sizes indicate heterozygosity.

C32 and SW837 are controls without LOH.

Grey shading indicates the distal limit of the region that has retention of heterozygosity.

The actual mitotic recombination breakpoint lies distal to the shaded region, but in the absence of paired constitutional DNA, the breakpoint location remains imprecise.

| Position    | Polymorphism ID 1 | Polymorphism ID 2 | VACO4S |     | C10 |     | CAC02 |     | C70 |     | C32 |     | SW837 |     | Allele sizes (bp) | Heterozygosity (where known) |
|-------------|-------------------|-------------------|--------|-----|-----|-----|-------|-----|-----|-----|-----|-----|-------|-----|-------------------|------------------------------|
| 52,321,211  | AFM207YG11        | D5S623            | 145    | 147 | 136 | 136 | 147   | 147 | 139 | 143 | 147 | 147 | 147   | 153 | 143-159           |                              |
| 55,009,278  | AFM311YD1         | D5S664            | 127    | 129 | 131 | 133 | 120   | 131 | 129 | 135 | 112 | 128 | 116   | 127 | 119-143           | 0.84                         |
| 56,030,500  | AFM163XA11        | D5S407            | 101    | 111 | 103 | 109 | 113   | 119 | 115 | 117 |     |     | 101   | 115 | 107-127           | 0.87                         |
| 57,604,744  | AFM095ZB7         | D5S398            | 109    | 114 | 109 | 111 | 111   | 111 | 103 | 107 |     |     | 103   | 107 | 109-121           |                              |
| 58,185,562  | AFMA081TG1        | D5S2107           | 168    | 172 | 176 | 180 | 172   | 174 | 174 | 174 | 174 | 174 | 170   | 174 | 166-188           | 0.85                         |
| 60,485,524  | AFM207YH2         | D5S624            | 140    | 154 | 144 | 144 | 140   | 154 | 144 | 152 | 152 | 158 | 156   | 158 | 146-166           | 0.84                         |
| 61,010,830  | AFMA247YH9        | D5S1990           | 216    | 240 | 216 | 244 | 216   | 260 | 222 | 238 | 236 | 242 | 234   | 236 | 204-248           | 0.86                         |
| 65,979,461  | AFMA052TB9        | D5S2089           | 177    | 181 | 163 | 171 | 163   | 163 | 163 | 177 | 173 | 177 | 163   | 163 | 163-185           |                              |
| 66,282,906  | AFM292VE1         | D5S647            | 130    | 132 | 146 | 150 | 136   | 152 | 130 | 150 | 134 | 134 | 130   | 132 | 126-156           | 0.82                         |
| 67,548,348  | rs2067135         |                   | 158    | 186 | 160 | 186 | 158   | 160 | 158 | 188 | 186 | 186 | 158   | 186 | ins/del 28bp      | 0.50                         |
| 67,839,171  | AFMB201YB9        | D5S2019           | 110    | 110 | 106 | 110 | 112   | 114 | 108 | 108 |     |     |       |     | 98-120            |                              |
| 67,774,622  | rs1305058         |                   | 124    | 143 | 124 | 143 | 124   | 124 | 143 | 143 | 145 | 145 | 124   | 143 | ins/del 18bp      | 0.49                         |
| 68,506,356  | rs3087334         |                   | 162    | 165 | 166 | 166 | 166   | 166 | 162 | 162 | 162 | 165 | 162   | 162 | ins/del 4bp       | 0.43                         |
| 70,864,185  | rs2307799         |                   | 117    | 121 | 121 | 121 | 121   | 121 | 117 | 117 | 121 | 121 | 117   | 121 | ins/del 4bp       | 0.49                         |
| 71,865,418  | rs1610940         |                   | 173    | 178 | 178 | 178 | 178   | 178 | 178 | 178 | 174 | 178 | 174   | 178 | ins/del 4bp       | 0.43                         |
| 74,563,430  | AFMA348WD1        | D5S2003           | 185    | 185 | 173 | 173 | 183   | 183 | 183 | 183 | 173 | 187 | 171   | 187 | 157-193           | 0.81                         |
| 76,709,492  | AFMB330YD9        | D5S2041           | 230    | 230 | 218 | 218 | 228   | 228 | 219 | 219 | 224 | 226 | 224   | 224 | 206-234           | 0.81                         |
| 81,493,027  | AFMB307YD5        | D5S2029           | 130    | 130 | 128 | 128 | 140   | 140 | 122 | 122 | 120 | 128 | 120   | 138 | 122-148           | 0.88                         |
| 83,635,324  | MFD27A            | D5S107            | 141    | 141 | 141 | 141 | 141   | 141 | 143 | 143 | 139 | 141 | 131   | 139 | 133-155           | 0.81                         |
| 95,838,450  | AFM288VA9         | D5S644            | 89     | 89  | 87  | 87  | 91    | 91  | 77  | 77  | 85  | 91  | 85    | 87  | 81-101            | 0.85                         |
| 104,002,962 | AFM321YB5         | D5S669            | 202    | 202 | 198 | 198 | 202   | 202 | 196 | 196 | 202 | 202 | 196   | 198 | 190-210           | 0.81                         |
| 112,250,000 | D5S346            |                   | 119    | 119 | 111 | 111 |       |     | 117 | 117 | 111 | 117 | 107   | 109 | 96-122            | 0.82                         |
