# Supplementary material for: A mitotic recombination map proximal to the APC locus on chromosome 5q and assessment of influences on colorectal cancer risk
Source: PubMed Central journal article supplement (PMC2705358; doi:10.1186/1471-2350-10-54), 2009-06-10
Supplement: 1471-2350-10-54-S2.pdf [file 1471-2350-10-54-S2.pdf]

*Additional file 2. Chromosome 5 SNPs used to assess LOH on the custom Illumina Goldengate arrays.*  
 SNP IDs and location are shown.

| <b>Name</b> | <b>Chr</b> | <b>Position (bases)</b> |
|-------------|------------|-------------------------|
| rs3828570   | 5          | 654,647                 |
| rs413666    | 5          | 726,408                 |
| rs465498    | 5          | 1,378,803               |
| rs27070     | 5          | 1,399,303               |
| rs904759    | 5          | 1,789,837               |
| rs1373942   | 5          | 13,709,297              |
| rs2034586   | 5          | 30,082,244              |
| rs1328254   | 5          | 49,596,616              |
| rs496230    | 5          | 49,606,770              |
| rs1033109   | 5          | 49,659,296              |
| rs2102454   | 5          | 49,784,037              |
| rs1423644   | 5          | 49,867,027              |
| rs204915    | 5          | 50,062,685              |
| rs27863     | 5          | 50,201,246              |
| rs4866023   | 5          | 50,381,012              |
| rs1501976   | 5          | 50,540,380              |
| rs6867206   | 5          | 50,688,451              |
| rs6880356   | 5          | 50,839,649              |
| rs3857260   | 5          | 51,052,663              |
| rs9291922   | 5          | 51,266,644              |
| rs7341064   | 5          | 51,469,038              |
| rs1424903   | 5          | 51,669,550              |
| rs1834261   | 5          | 51,788,163              |
| rs11958309  | 5          | 51,930,917              |
| rs1820167   | 5          | 52,155,113              |
| rs2974987   | 5          | 52,386,999              |
| rs977576    | 5          | 52,592,967              |
| rs1363969   | 5          | 52,807,274              |
| rs256094    | 5          | 53,008,681              |
| rs7713737   | 5          | 53,241,460              |
| rs700915    | 5          | 53,456,391              |
| rs10075673  | 5          | 53,657,681              |
| rs2059216   | 5          | 53,854,270              |
| rs895329    | 5          | 54,068,584              |
| rs952382    | 5          | 54,263,361              |
| rs336081    | 5          | 54,469,150              |
| rs2290597   | 5          | 54,685,878              |
| rs7721054   | 5          | 54,926,559              |
| rs2619046   | 5          | 55,133,291              |
| rs6870870   | 5          | 55,330,085              |
| rs191205    | 5          | 55,437,355              |
| rs1020388   | 5          | 55,595,784              |
| rs157843    | 5          | 55,834,941              |
| rs10060816  | 5          | 56,016,407              |

|            |   |            |
|------------|---|------------|
| rs832569   | 5 | 56,190,341 |
| rs831818   | 5 | 56,393,904 |
| rs7168     | 5 | 56,594,995 |
| rs6450425  | 5 | 56,785,344 |
| rs2109479  | 5 | 56,979,996 |
| rs1020661  | 5 | 57,215,261 |
| rs7731718  | 5 | 57,409,658 |
| rs40207    | 5 | 57,611,462 |
| rs697141   | 5 | 57,791,740 |
| rs158958   | 5 | 57,992,021 |
| rs12655408 | 5 | 58,214,110 |
| rs1391651  | 5 | 58,412,212 |
| rs256752   | 5 | 58,633,646 |
| rs40215    | 5 | 58,877,103 |
| rs2164661  | 5 | 59,085,334 |
| rs7715428  | 5 | 59,279,140 |
| rs1981848  | 5 | 59,478,693 |
| rs12054887 | 5 | 59,627,881 |
| rs153031   | 5 | 59,823,048 |
| rs3857236  | 5 | 59,945,286 |
| rs6874699  | 5 | 60,109,757 |
| rs34638    | 5 | 60,386,244 |
| rs34609    | 5 | 60,517,165 |
| rs6449531  | 5 | 60,747,969 |
| rs1501841  | 5 | 60,983,240 |
| rs1374065  | 5 | 61,099,359 |
| rs2032876  | 5 | 61,344,489 |
| rs13359224 | 5 | 61,518,850 |
| rs959899   | 5 | 61,687,005 |
| rs26642    | 5 | 61,820,146 |
| rs2112984  | 5 | 61,975,517 |
| rs2363295  | 5 | 62,168,416 |
| rs2221988  | 5 | 62,372,925 |
| rs346416   | 5 | 62,577,650 |
| rs10038844 | 5 | 62,745,709 |
| rs1559090  | 5 | 62,910,088 |
| rs13173277 | 5 | 63,073,293 |
| rs358524   | 5 | 63,258,537 |
| rs356578   | 5 | 63,477,556 |
| rs10064715 | 5 | 63,701,617 |
| rs10067169 | 5 | 63,906,866 |
| rs2034995  | 5 | 64,123,568 |
| rs2163955  | 5 | 64,277,699 |
| rs264739   | 5 | 64,401,809 |
| rs16893588 | 5 | 64,583,755 |
| rs1493451  | 5 | 64,762,196 |
| rs27141    | 5 | 64,917,692 |
| rs1301475  | 5 | 65,093,399 |
| rs251608   | 5 | 65,283,649 |
| rs153389   | 5 | 65,458,485 |
| rs1896654  | 5 | 65,623,540 |
| rs10514995 | 5 | 65,775,195 |

|            |   |            |
|------------|---|------------|
| rs4128347  | 5 | 65,943,943 |
| rs33724    | 5 | 66,134,163 |
| rs27217    | 5 | 66,254,873 |
| rs2545387  | 5 | 66,424,155 |
| rs1428478  | 5 | 66,573,467 |
| rs32015    | 5 | 66,733,395 |
| rs4267824  | 5 | 66,914,243 |
| rs6449915  | 5 | 67,079,671 |
| rs9291908  | 5 | 67,275,992 |
| rs993863   | 5 | 67,459,612 |
| rs3756668  | 5 | 67,631,844 |
| rs6897790  | 5 | 67,838,687 |
| rs724006   | 5 | 67,878,862 |
| rs33294    | 5 | 68,106,034 |
| rs249233   | 5 | 68,125,520 |
| rs7720417  | 5 | 68,194,356 |
| rs6449986  | 5 | 68,270,525 |
| rs6898541  | 5 | 68,285,570 |
| rs7733467  | 5 | 68,300,509 |
| rs4976058  | 5 | 68,326,778 |
| rs4976067  | 5 | 68,352,124 |
| rs164561   | 5 | 68,376,084 |
| rs163192   | 5 | 68,415,592 |
| rs100192   | 5 | 68,523,930 |
| rs2930946  | 5 | 68,548,760 |
| rs2972381  | 5 | 68,573,998 |
| rs10940209 | 5 | 68,594,306 |
| rs4421064  | 5 | 68,614,184 |
| rs4976189  | 5 | 68,634,595 |
| rs2010352  | 5 | 68,692,083 |
| rs1168402  | 5 | 68,743,128 |
| rs2561182  | 5 | 68,769,401 |
| rs28489109 | 5 | 68,844,257 |
| rs4081993  | 5 | 68,891,872 |
| rs28665832 | 5 | 69,274,432 |
| rs2591321  | 5 | 69,321,642 |
| rs2630908  | 5 | 69,734,045 |
| rs575909   | 5 | 70,309,633 |
| rs28751879 | 5 | 70,341,309 |
| rs28538463 | 5 | 70,341,452 |
| rs28447466 | 5 | 70,342,434 |
| rs36065930 | 5 | 70,343,142 |
| rs4976210  | 5 | 70,343,220 |
| rs28409706 | 5 | 70,344,007 |
| rs6453529  | 5 | 70,739,833 |
| rs7449303  | 5 | 70,745,215 |
| rs7443752  | 5 | 70,752,311 |
| rs12520305 | 5 | 70,763,700 |
| rs986217   | 5 | 70,780,414 |
| rs7448990  | 5 | 70,789,690 |
| rs4337836  | 5 | 70,817,174 |
| rs1961760  | 5 | 70,842,405 |

|            |   |            |
|------------|---|------------|
| rs182190   | 5 | 70,875,989 |
| rs277966   | 5 | 70,915,766 |
| rs277984   | 5 | 70,966,722 |
| rs3763154  | 5 | 71,049,233 |
| rs1798575  | 5 | 71,141,418 |
| rs10058537 | 5 | 71,209,059 |
| rs7719321  | 5 | 71,309,216 |
| rs1217791  | 5 | 71,406,940 |
| rs6874186  | 5 | 71,512,871 |
| rs11749445 | 5 | 71,603,661 |
| rs10069831 | 5 | 71,780,124 |
| rs33419    | 5 | 71,882,477 |
| rs3846640  | 5 | 72,055,722 |
| rs198214   | 5 | 72,255,507 |
| rs1200485  | 5 | 72,420,814 |
| rs9293560  | 5 | 72,637,254 |
| rs7703551  | 5 | 72,842,274 |
| rs6890324  | 5 | 73,065,896 |
| rs283596   | 5 | 73,278,467 |
| rs158812   | 5 | 73,526,030 |
| rs586853   | 5 | 73,714,140 |
| rs2927633  | 5 | 73,816,540 |
| rs379146   | 5 | 73,968,290 |
| rs1993370  | 5 | 74,194,893 |
| rs4492095  | 5 | 74,353,035 |
| rs1363577  | 5 | 74,498,941 |
| rs3843480  | 5 | 74,660,238 |
| rs4704223  | 5 | 74,809,176 |
| rs1863934  | 5 | 74,952,628 |
| rs39656    | 5 | 75,084,221 |
| rs11746298 | 5 | 75,290,322 |
| rs7713316  | 5 | 75,491,776 |
| rs890708   | 5 | 75,719,916 |
| rs1047530  | 5 | 75,947,155 |
| rs2242995  | 5 | 76,151,421 |
| rs1500     | 5 | 76,312,594 |
| rs6864250  | 5 | 76,485,946 |
| rs1531615  | 5 | 76,654,613 |
| rs10076883 | 5 | 76,871,991 |
| rs456187   | 5 | 77,087,709 |
| rs837030   | 5 | 77,269,764 |
| rs1363235  | 5 | 77,456,412 |
| rs10805919 | 5 | 77,628,680 |
| rs1050674  | 5 | 77,818,845 |
| rs340085   | 5 | 78,034,542 |
| rs337887   | 5 | 78,264,792 |
| rs649514   | 5 | 78,445,289 |
| rs2220839  | 5 | 78,639,266 |
| rs736201   | 5 | 78,873,312 |
| rs6870619  | 5 | 79,031,806 |
| rs265002   | 5 | 79,194,908 |
| rs2434291  | 5 | 79,433,983 |

|            |   |            |
|------------|---|------------|
| rs10063054 | 5 | 79,680,444 |
| rs6883095  | 5 | 79,926,803 |
| rs6151850  | 5 | 80,124,816 |
| rs34999    | 5 | 80,312,801 |
| rs1020720  | 5 | 80,508,524 |
| rs4703517  | 5 | 80,691,022 |
| rs7702047  | 5 | 80,890,151 |
| rs417304   | 5 | 81,068,575 |
| rs1566629  | 5 | 81,243,028 |
| rs6891113  | 5 | 81,428,874 |
| rs2215128  | 5 | 81,630,840 |
| rs1501656  | 5 | 81,822,452 |
| rs11948759 | 5 | 82,078,918 |
| rs27942    | 5 | 82,330,448 |
| rs1120476  | 5 | 82,458,399 |
| rs10805813 | 5 | 82,683,802 |
| rs173686   | 5 | 82,847,256 |
| rs336965   | 5 | 83,004,341 |
| rs4563604  | 5 | 83,178,877 |
| rs958643   | 5 | 83,343,343 |
| rs164438   | 5 | 83,477,060 |
| rs1445748  | 5 | 83,616,059 |
| rs16901127 | 5 | 83,836,023 |
| rs10076429 | 5 | 84,039,445 |
| rs7719527  | 5 | 84,245,129 |
| rs4565249  | 5 | 84,439,840 |
| rs733481   | 5 | 84,646,369 |
| rs413927   | 5 | 84,848,924 |
| rs7718884  | 5 | 85,051,201 |
| rs893554   | 5 | 85,267,959 |
| rs1006163  | 5 | 85,517,198 |
| rs7735255  | 5 | 85,682,856 |
| rs6452716  | 5 | 85,875,334 |
| rs187609   | 5 | 86,049,616 |
| rs4920774  | 5 | 86,229,784 |
| rs2112168  | 5 | 86,440,646 |
| rs13362486 | 5 | 86,639,581 |
| rs878196   | 5 | 86,830,251 |
| rs840818   | 5 | 87,012,486 |
| rs710363   | 5 | 87,176,203 |
| rs6879443  | 5 | 87,357,550 |
| rs357509   | 5 | 87,523,698 |
| rs247913   | 5 | 87,654,484 |
| rs4352629  | 5 | 87,792,577 |
| rs616391   | 5 | 88,074,601 |
| rs1455098  | 5 | 88,289,093 |
| rs10474292 | 5 | 88,516,971 |
| rs383242   | 5 | 88,764,803 |
| rs10057743 | 5 | 88,977,154 |
| rs10063565 | 5 | 89,168,121 |
| rs411198   | 5 | 89,378,930 |
| rs4916794  | 5 | 89,609,684 |

|            |   |            |
|------------|---|------------|
| rs2935530  | 5 | 89,721,016 |
| rs37238    | 5 | 89,860,732 |
| rs10070074 | 5 | 90,058,163 |
| rs1976566  | 5 | 90,253,603 |
| rs4458614  | 5 | 90,476,902 |
| rs6452949  | 5 | 90,680,893 |
| rs1505851  | 5 | 90,929,710 |
| rs1366133  | 5 | 91,150,340 |
| rs825395   | 5 | 91,284,916 |
| rs10056713 | 5 | 91,438,628 |
| rs4395616  | 5 | 91,720,842 |
| rs12234024 | 5 | 91,938,709 |
| rs1429056  | 5 | 92,174,756 |
| rs1390614  | 5 | 92,420,334 |
| rs7443364  | 5 | 92,680,888 |
| rs2029401  | 5 | 92,916,785 |
| rs11135392 | 5 | 93,159,478 |
| rs6860390  | 5 | 93,520,487 |
| rs29963    | 5 | 93,723,401 |
| rs11949638 | 5 | 93,933,645 |
| rs4869118  | 5 | 94,114,614 |
| rs293033   | 5 | 94,307,424 |
| rs251080   | 5 | 94,537,060 |
| rs2431503  | 5 | 94,746,042 |
| rs2560258  | 5 | 94,869,243 |
| rs440342   | 5 | 95,003,264 |
| rs34896    | 5 | 95,109,887 |
| rs10515232 | 5 | 95,336,741 |
| rs10476546 | 5 | 95,578,352 |
| rs4869282  | 5 | 95,695,921 |
| rs269853   | 5 | 95,832,735 |
| rs26515    | 5 | 96,080,593 |
| rs1981846  | 5 | 96,294,618 |
| rs444243   | 5 | 96,493,512 |
| rs1919247  | 5 | 96,681,502 |
| rs1843331  | 5 | 96,873,334 |
| rs1560327  | 5 | 97,053,020 |
| rs6557008  | 5 | 97,192,546 |
| rs380331   | 5 | 97,371,076 |
| rs11951090 | 5 | 97,569,655 |
| rs725763   | 5 | 97,720,491 |
| rs27022    | 5 | 97,968,940 |
| rs1508792  | 5 | 98,137,048 |
| rs162149   | 5 | 98,277,455 |
| rs7717324  | 5 | 98,426,572 |
| rs1073601  | 5 | 98,594,496 |
| rs2030605  | 5 | 98,741,476 |
| rs2511961  | 5 | 98,906,572 |
| rs13354756 | 5 | 99,057,674 |
| rs1462405  | 5 | 99,102,213 |
| rs1622879  | 5 | 99,138,247 |
| rs6594769  | 5 | 99,176,463 |

|            |   |             |
|------------|---|-------------|
| rs7448852  | 5 | 99,214,153  |
| rs2927424  | 5 | 99,286,029  |
| rs1542520  | 5 | 99,376,285  |
| rs7730463  | 5 | 99,406,397  |
| rs9790951  | 5 | 99,437,789  |
| rs4317298  | 5 | 99,493,434  |
| rs6894070  | 5 | 99,553,754  |
| rs1504524  | 5 | 99,579,920  |
| rs445427   | 5 | 99,617,942  |
| rs1833843  | 5 | 99,655,735  |
| rs1880076  | 5 | 99,711,180  |
| rs4703100  | 5 | 99,812,015  |
| rs27458    | 5 | 99,908,670  |
| rs157178   | 5 | 100,099,693 |
| rs3756355  | 5 | 100,267,900 |
| rs6595881  | 5 | 100,701,152 |
| rs4703156  | 5 | 100,935,754 |
| rs10463906 | 5 | 101,174,950 |
| rs1477616  | 5 | 101,423,290 |
| rs841921   | 5 | 101,658,829 |
| rs7735587  | 5 | 101,906,139 |
| rs461605   | 5 | 102,148,168 |
| rs17154821 | 5 | 102,269,240 |
| rs154355   | 5 | 102,526,780 |
| rs372564   | 5 | 102,678,423 |
| rs10066920 | 5 | 102,794,751 |
| rs414926   | 5 | 102,943,933 |
| rs9327892  | 5 | 103,121,479 |
| rs10051527 | 5 | 103,311,866 |
| rs1922495  | 5 | 103,506,417 |
| rs6596572  | 5 | 103,752,969 |
| rs254023   | 5 | 103,983,260 |
| rs1217470  | 5 | 104,237,855 |
| rs294148   | 5 | 104,489,057 |
| rs249557   | 5 | 104,710,326 |
| rs12518325 | 5 | 104,979,858 |
| rs10447297 | 5 | 105,246,505 |
| rs1435199  | 5 | 105,506,390 |
| rs4279324  | 5 | 105,748,916 |
| rs6596684  | 5 | 105,972,832 |
| rs1898625  | 5 | 106,171,984 |
| rs4395620  | 5 | 106,356,225 |
| rs7735512  | 5 | 106,551,753 |
| rs252816   | 5 | 106,752,310 |
| rs4090594  | 5 | 106,984,342 |
| rs1368441  | 5 | 107,223,156 |
| rs286821   | 5 | 107,457,409 |
| rs2966833  | 5 | 107,699,831 |
| rs7719573  | 5 | 107,960,054 |
| rs6880284  | 5 | 108,196,054 |
| rs17161607 | 5 | 108,470,727 |
| rs1045706  | 5 | 108,742,197 |

|           |   |             |
|-----------|---|-------------|
| rs77013   | 5 | 108,990,985 |
| rs1807912 | 5 | 109,245,567 |
| rs6883748 | 5 | 109,441,142 |
| rs6895504 | 5 | 109,640,667 |
| rs6892291 | 5 | 109,866,948 |
| rs244431  | 5 | 110,133,062 |
| rs6879236 | 5 | 110,361,050 |
| rs7714962 | 5 | 110,587,453 |
| rs2300782 | 5 | 110,816,684 |
| rs1154308 | 5 | 111,049,878 |
| rs1507844 | 5 | 111,275,761 |
| rs27342   | 5 | 111,493,331 |
| rs1464765 | 5 | 111,639,361 |
| rs341328  | 5 | 111,855,488 |
| rs1968557 | 5 | 112,056,943 |
| rs1460039 | 5 | 122,078,905 |
| rs708459  | 5 | 132,236,067 |
| rs33388   | 5 | 142,677,488 |
| rs1438952 | 5 | 152,448,638 |
| rs1299048 | 5 | 162,160,289 |
| rs1445795 | 5 | 172,772,594 |
| rs1544926 | 5 | 177,597,948 |
| rs584609  | 5 | 178,774,015 |
| rs1982301 | 5 | 179,482,982 |
| rs1467    | 5 | 180,418,326 |
| rs1053110 | 5 | 180,420,866 |
