# Supplementary material for: A mitotic recombination map proximal to the APC locus on chromosome 5q and assessment of influences on colorectal cancer risk
Source: PubMed Central journal article supplement (PMC2705358; doi:10.1186/1471-2350-10-54), 2009-06-10
Supplement: 1471-2350-10-54-S3.pdf [file 1471-2350-10-54-S3.pdf]

*Additional file 3. Chromosome 5 SNPs between 68Mb and 80Mb tested for association with colorectal cancer risk.*

The table shows genotype counts (nominally AA, AB, BB) in cases and controls, followed by allelic odds ratio, and P value under the allelic  $\chi^2$  test (or Fisher's exact test for low cell counts).

| SNP        | chr  | loc        | AAcases | ABcases | BBcases | AActrls | ABctrls | BBctrls | all_OR | all_pval | $-\log_{10}P_{\text{allelic}}$ |
|------------|------|------------|---------|---------|---------|---------|---------|---------|--------|----------|--------------------------------|
| rs13171512 | chr5 | 68,000,787 | 617     | 277     | 28      | 615     | 280     | 37      | 1.06   | 4.90E-01 | 3.10E-01                       |
| rs10940172 | chr5 | 68,002,670 | 584     | 304     | 34      | 576     | 307     | 49      | 1.1    | 2.60E-01 | 5.85E-01                       |
| rs2607378  | chr5 | 68,015,556 | 1       | 61      | 853     | 2       | 72      | 843     | 0.825  | 3.10E-01 | 5.09E-01                       |
| rs10070379 | chr5 | 68,022,050 | 607     | 288     | 26      | 629     | 268     | 34      | 0.973  | 7.80E-01 | 1.08E-01                       |
| rs1286371  | chr5 | 68,029,954 | 517     | 351     | 54      | 526     | 345     | 61      | 1.01   | 9.40E-01 | 2.69E-02                       |
| rs12658051 | chr5 | 68,039,213 | 407     | 408     | 106     | 437     | 399     | 96      | 0.915  | 2.20E-01 | 6.58E-01                       |
| rs1687503  | chr5 | 68,039,523 | 27      | 214     | 681     | 14      | 232     | 686     | 1.05   | 6.40E-01 | 1.94E-01                       |
| rs246978   | chr5 | 68,041,802 | 474     | 364     | 80      | 461     | 385     | 85      | 1.06   | 4.20E-01 | 3.77E-01                       |
| rs246973   | chr5 | 68,043,559 | 78      | 369     | 475     | 85      | 386     | 459     | 0.934  | 3.60E-01 | 4.44E-01                       |
| rs3852133  | chr5 | 68,052,116 | 28      | 218     | 668     | 18      | 204     | 706     | 1.19   | 7.90E-02 | 1.10E+00                       |
| rs35243    | chr5 | 68,054,018 | 63      | 356     | 503     | 69      | 364     | 499     | 0.96   | 6.10E-01 | 2.15E-01                       |
| rs35240    | chr5 | 68,055,530 | 99      | 411     | 412     | 110     | 419     | 403     | 0.945  | 4.40E-01 | 3.57E-01                       |
| rs35239    | chr5 | 68,064,834 | 43      | 281     | 598     | 32      | 313     | 587     | 0.98   | 8.40E-01 | 7.57E-02                       |
| rs10515095 | chr5 | 68,065,227 | 670     | 223     | 29      | 704     | 210     | 18      | 0.846  | 8.30E-02 | 1.08E+00                       |
| rs33278    | chr5 | 68,065,763 | 582     | 294     | 45      | 575     | 314     | 40      | 1.02   | 8.20E-01 | 8.62E-02                       |
| rs27687    | chr5 | 68,068,178 | 499     | 353     | 70      | 492     | 362     | 78      | 1.05   | 4.90E-01 | 3.10E-01                       |
| rs26685    | chr5 | 68,068,766 | 212     | 446     | 264     | 206     | 452     | 274     | 1.03   | 6.40E-01 | 1.94E-01                       |
| rs12516844 | chr5 | 68,073,833 | 770     | 144     | 8       | 740     | 184     | 8       | 1.27   | 4.00E-02 | 1.40E+00                       |
| rs7703932  | chr5 | 68,080,287 | 214     | 428     | 275     | 226     | 457     | 244     | 0.91   | 1.60E-01 | 7.96E-01                       |
| rs13177007 | chr5 | 68,080,610 | 763     | 155     | 4       | 777     | 150     | 5       | 0.968  | 8.30E-01 | 8.09E-02                       |
| rs26337    | chr5 | 68,090,330 | 156     | 408     | 358     | 137     | 421     | 374     | 1.08   | 2.80E-01 | 5.53E-01                       |
| rs13175238 | chr5 | 68,094,416 | 5       | 151     | 766     | 5       | 147     | 780     | 1.04   | 7.80E-01 | 1.08E-01                       |
| rs28289    | chr5 | 68,096,315 | 247     | 453     | 222     | 276     | 440     | 216     | 0.928  | 2.70E-01 | 5.69E-01                       |
| rs2451819  | chr5 | 68,100,520 | 323     | 422     | 175     | 330     | 446     | 156     | 0.948  | 4.40E-01 | 3.57E-01                       |
| rs33294    | chr5 | 68,106,034 | 308     | 430     | 184     | 321     | 442     | 169     | 0.943  | 4.00E-01 | 3.98E-01                       |
| rs2913277  | chr5 | 68,138,961 | 184     | 423     | 315     | 181     | 451     | 300     | 0.971  | 6.80E-01 | 1.67E-01                       |
| rs2913280  | chr5 | 68,149,933 | 85      | 358     | 479     | 85      | 391     | 456     | 0.932  | 3.50E-01 | 4.56E-01                       |
| rs11959994 | chr5 | 68,156,251 | 17      | 197     | 694     | 14      | 206     | 701     | 1      | 9.70E-01 | 1.32E-02                       |
| rs2972426  | chr5 | 68,166,067 | 448     | 380     | 94      | 444     | 386     | 102     | 1.04   | 6.00E-01 | 2.22E-01                       |
| rs1427906  | chr5 | 68,166,377 | 93      | 380     | 449     | 101     | 383     | 448     | 0.968  | 6.80E-01 | 1.67E-01                       |
| rs10039512 | chr5 | 68,178,949 | 446     | 383     | 93      | 446     | 385     | 101     | 1.03   | 7.00E-01 | 1.55E-01                       |
| rs7710526  | chr5 | 68,192,781 | 921     | 1       | 0       | 932     | 0       | 0       | 0      | 5.00E-01 | 3.01E-01                       |
| rs7720417  | chr5 | 68,194,356 | 91      | 383     | 448     | 100     | 387     | 445     | 0.961  | 6.00E-01 | 2.22E-01                       |
| rs12153013 | chr5 | 68,194,574 | 93      | 382     | 447     | 101     | 390     | 441     | 0.956  | 5.50E-01 | 2.60E-01                       |
| rs4246760  | chr5 | 68,214,163 | 192     | 454     | 276     | 177     | 466     | 289     | 1.06   | 3.90E-01 | 4.09E-01                       |
| rs4131295  | chr5 | 68,230,400 | 796     | 118     | 8       | 822     | 108     | 2       | 0.816  | 1.40E-01 | 8.54E-01                       |
| rs7713600  | chr5 | 68,235,434 | 29      | 259     | 634     | 39      | 261     | 632     | 0.934  | 4.50E-01 | 3.47E-01                       |
| rs7718291  | chr5 | 68,236,398 | 601     | 285     | 36      | 640     | 270     | 22      | 0.844  | 5.20E-02 | 1.28E+00                       |
| rs10038257 | chr5 | 68,242,153 | 30      | 258     | 634     | 39      | 260     | 633     | 0.941  | 5.10E-01 | 2.92E-01                       |
| rs10940184 | chr5 | 68,245,085 | 736     | 174     | 12      | 751     | 174     | 7       | 0.932  | 5.50E-01 | 2.60E-01                       |
| rs11747940 | chr5 | 68,245,160 | 385     | 416     | 121     | 408     | 397     | 127     | 0.967  | 6.50E-01 | 1.87E-01                       |
| rs13436110 | chr5 | 68,253,745 | 624     | 265     | 33      | 604     | 287     | 40      | 1.12   | 1.80E-01 | 7.45E-01                       |
| rs11951039 | chr5 | 68,257,343 | 637     | 249     | 30      | 656     | 255     | 18      | 0.915  | 3.40E-01 | 4.69E-01                       |
| rs4976054  | chr5 | 68,260,759 | 438     | 412     | 72      | 464     | 405     | 63      | 0.923  | 2.80E-01 | 5.53E-01                       |
| rs6449986  | chr5 | 68,270,525 | 298     | 458     | 166     | 311     | 446     | 175     | 0.994  | 9.60E-01 | 1.77E-02                       |
| rs4505911  | chr5 | 68,277,393 | 8       | 130     | 784     | 4       | 119     | 809     | 1.18   | 2.20E-01 | 6.58E-01                       |
| rs10064315 | chr5 | 68,281,215 | 196     | 459     | 267     | 183     | 487     | 262     | 1.02   | 8.40E-01 | 7.57E-02                       |
| rs10071585 | chr5 | 68,281,676 | 343     | 439     | 132     | 334     | 442     | 151     | 1.07   | 3.10E-01 | 5.09E-01                       |
| rs11951431 | chr5 | 68,289,708 | 504     | 340     | 78      | 488     | 385     | 59      | 1      | 9.80E-01 | 8.77E-03                       |
| rs6414814  | chr5 | 68,299,358 | 135     | 448     | 338     | 159     | 447     | 326     | 0.918  | 2.10E-01 | 6.78E-01                       |
| rs4246761  | chr5 | 68,315,467 | 469     | 370     | 82      | 464     | 381     | 87      | 1.04   | 6.30E-01 | 2.01E-01                       |
| rs4976058  | chr5 | 68,326,778 | 34      | 294     | 594     | 32      | 298     | 602     | 1.01   | 9.00E-01 | 4.58E-02                       |
| rs3922937  | chr5 | 68,333,747 | 612     | 278     | 32      | 616     | 287     | 28      | 0.992  | 9.60E-01 | 1.77E-02                       |
| rs4976075  | chr5 | 68,357,003 | 305     | 448     | 169     | 288     | 461     | 182     | 1.07   | 3.20E-01 | 4.95E-01                       |
| rs11741847 | chr5 | 68,367,828 | 84      | 352     | 486     | 69      | 393     | 469     | 0.984  | 8.60E-01 | 6.55E-02                       |
| rs52131    | chr5 | 68,371,497 | 669     | 235     | 18      | 704     | 218     | 10      | 0.85   | 9.70E-02 | 1.01E+00                       |
| rs1982773  | chr5 | 68,371,892 | 693     | 198     | 31      | 690     | 225     | 17      | 0.983  | 8.90E-01 | 5.06E-02                       |
| rs11738928 | chr5 | 68,374,875 | 0       | 33      | 889     | 1       | 45      | 886     | 0.704  | 1.60E-01 | 7.96E-01                       |
| rs164561   | chr5 | 68,376,084 | 505     | 373     | 44      | 494     | 388     | 50      | 1.06   | 4.30E-01 | 3.67E-01                       |
| rs4976178  | chr5 | 68,377,991 | 424     | 400     | 98      | 412     | 403     | 117     | 1.09   | 2.50E-01 | 6.02E-01                       |
| rs149292   | chr5 | 68,381,404 | 567     | 310     | 45      | 554     | 336     | 41      | 1.04   | 6.10E-01 | 2.15E-01                       |
| rs164562   | chr5 | 68,381,681 | 18      | 235     | 669     | 11      | 218     | 702     | 1.16   | 1.20E-01 | 9.21E-01                       |
| rs6897246  | chr5 | 68,385,673 | 98      | 401     | 422     | 117     | 406     | 409     | 0.917  | 2.30E-01 | 6.38E-01                       |

|              |      |            |     |     |     |     |     |     |       |          |          |  |  |
|--------------|------|------------|-----|-----|-----|-----|-----|-----|-------|----------|----------|--|--|
| rs2637130    | chr5 | 68,397,214 | 270 | 457 | 195 | 306 | 446 | 180 | 0.897 | 1.10E-01 | 9.59E-01 |  |  |
| rs2434349    | chr5 | 68,407,652 | 243 | 463 | 214 | 285 | 449 | 198 | 0.883 | 6.40E-02 | 1.19E+00 |  |  |
| rs12522805   | chr5 | 68,432,336 | 58  | 324 | 535 | 56  | 326 | 548 | 1.02  | 7.80E-01 | 1.08E-01 |  |  |
| rs164396     | chr5 | 68,443,472 | 177 | 415 | 327 | 168 | 461 | 299 | 0.956 | 5.20E-01 | 2.84E-01 |  |  |
| rs164392     | chr5 | 68,445,370 | 560 | 307 | 55  | 554 | 341 | 37  | 0.98  | 8.30E-01 | 8.09E-02 |  |  |
| rs164578     | chr5 | 68,453,399 | 179 | 402 | 326 | 168 | 458 | 299 | 0.959 | 5.50E-01 | 2.60E-01 |  |  |
| rs6880864    | chr5 | 68,458,441 | 601 | 244 | 25  | 626 | 251 | 19  | 0.946 | 5.70E-01 | 2.44E-01 |  |  |
| rs337253     | chr5 | 68,458,825 | 326 | 416 | 180 | 300 | 466 | 166 | 1.03  | 6.80E-01 | 1.67E-01 |  |  |
| rs435395     | chr5 | 68,462,731 | 257 | 430 | 198 | 235 | 464 | 184 | 1.02  | 8.20E-01 | 8.62E-02 |  |  |
| rs11749991   | chr5 | 68,462,828 | 26  | 236 | 660 | 11  | 220 | 701 | 1.24  | 2.50E-02 | 1.60E+00 |  |  |
| rs11951414   | chr5 | 68,467,628 | 46  | 341 | 535 | 47  | 344 | 541 | 0.999 | 9.80E-01 | 8.77E-03 |  |  |
| rs338685     | chr5 | 68,470,725 | 84  | 375 | 461 | 87  | 404 | 440 | 0.93  | 3.30E-01 | 4.81E-01 |  |  |
| rs4976175    | chr5 | 68,484,450 | 18  | 159 | 745 | 12  | 196 | 724 | 0.884 | 2.60E-01 | 5.85E-01 |  |  |
| rs2450246    | chr5 | 68,486,504 | 238 | 460 | 224 | 232 | 473 | 227 | 1.02  | 7.90E-01 | 1.02E-01 |  |  |
| rs389686     | chr5 | 68,490,922 | 123 | 409 | 390 | 126 | 440 | 366 | 0.933 | 3.30E-01 | 4.81E-01 |  |  |
| rs3846484    | chr5 | 68,504,814 | 704 | 199 | 19  | 736 | 184 | 12  | 0.852 | 1.20E-01 | 9.21E-01 |  |  |
| rs7736312    | chr5 | 68,521,747 | 704 | 199 | 19  | 737 | 183 | 12  | 0.847 | 1.10E-01 | 9.59E-01 |  |  |
| rs1976101    | chr5 | 68,532,208 | 440 | 389 | 93  | 421 | 423 | 88  | 1.05  | 5.60E-01 | 2.52E-01 |  |  |
| rs676012     | chr5 | 68,540,723 | 238 | 475 | 209 | 255 | 477 | 200 | 0.946 | 4.20E-01 | 3.77E-01 |  |  |
| rs11744596   | chr5 | 68,555,047 | 345 | 436 | 138 | 314 | 464 | 154 | 1.12  | 1.00E-01 | 1.00E+00 |  |  |
| rs2932777    | chr5 | 68,560,783 | 138 | 437 | 347 | 152 | 466 | 314 | 0.896 | 1.10E-01 | 9.59E-01 |  |  |
| rs2972381    | chr5 | 68,573,998 | 210 | 466 | 236 | 202 | 476 | 249 | 1.05  | 5.20E-01 | 2.84E-01 |  |  |
| rs4077460    | chr5 | 68,608,424 | 251 | 473 | 198 | 272 | 469 | 191 | 0.943 | 3.90E-01 | 4.09E-01 |  |  |
| rs12651858   | chr5 | 68,613,223 | 791 | 124 | 7   | 768 | 155 | 9   | 1.26  | 5.60E-02 | 1.25E+00 |  |  |
| rs6450029    | chr5 | 68,632,059 | 212 | 464 | 246 | 200 | 474 | 257 | 1.05  | 4.80E-01 | 3.19E-01 |  |  |
| rs11749723   | chr5 | 68,645,641 | 176 | 442 | 304 | 170 | 467 | 295 | 0.99  | 9.10E-01 | 4.10E-02 |  |  |
| rs10471774   | chr5 | 68,652,087 | 208 | 462 | 252 | 198 | 463 | 271 | 1.06  | 3.70E-01 | 4.32E-01 |  |  |
| rs12187268   | chr5 | 68,661,542 | 261 | 456 | 204 | 277 | 464 | 191 | 0.941 | 3.70E-01 | 4.32E-01 |  |  |
| rs9291949    | chr5 | 68,684,526 | 204 | 442 | 275 | 205 | 463 | 264 | 0.973 | 7.00E-01 | 1.55E-01 |  |  |
| rs6450035    | chr5 | 68,691,891 | 3   | 103 | 816 | 5   | 115 | 812 | 0.874 | 3.50E-01 | 4.56E-01 |  |  |
| rs3756399    | chr5 | 68,701,565 | 2   | 86  | 834 | 2   | 98  | 832 | 0.886 | 4.60E-01 | 3.37E-01 |  |  |
| rs1185246    | chr5 | 68,751,066 | 204 | 444 | 274 | 206 | 466 | 260 | 0.965 | 6.10E-01 | 2.15E-01 |  |  |
| rs299098     | chr5 | 68,755,507 | 230 | 446 | 199 | 247 | 459 | 187 | 0.938 | 3.60E-01 | 4.44E-01 |  |  |
| rs6450041    | chr5 | 68,760,674 | 1   | 84  | 836 | 2   | 99  | 831 | 0.837 | 2.70E-01 | 5.69E-01 |  |  |
| rs299075     | chr5 | 68,764,300 | 221 | 457 | 241 | 203 | 475 | 252 | 1.06  | 3.60E-01 | 4.44E-01 |  |  |
| rs2561182    | chr5 | 68,769,401 | 202 | 444 | 271 | 193 | 474 | 247 |       | 6.48E-01 | 1.88E-01 |  |  |
| rs2561183    | chr5 | 68,769,454 | 206 | 443 | 273 | 205 | 466 | 260 | 0.973 | 7.00E-01 | 1.55E-01 |  |  |
| rs11955686   | chr5 | 68,776,409 | 1   | 53  | 868 | 1   | 63  | 868 | 0.851 | 4.40E-01 | 3.57E-01 |  |  |
| rs4916 (CNV) | chr5 | 69,408,109 | 560 | 526 | 90  | 870 | 708 | 134 |       | 2.25E-01 | 6.48E-01 |  |  |
| rs13168712   | chr5 | 70,715,382 | 388 | 418 | 112 | 361 | 443 | 126 | 1.11  | 1.40E-01 | 8.54E-01 |  |  |
| rs7443752    | chr5 | 70,752,311 | 429 | 395 | 92  | 417 | 419 | 88  | 1.03  | 7.30E-01 | 1.37E-01 |  |  |
| rs7447545    | chr5 | 70,783,326 | 251 | 470 | 195 | 265 | 459 | 195 |       | 6.72E-01 | 1.73E-01 |  |  |
| rs6452722    | chr5 | 70,798,815 | 657 | 239 | 26  | 651 | 253 | 28  | 1.06  | 5.40E-01 | 2.68E-01 |  |  |
| rs7728577    | chr5 | 70,803,025 | 26  | 237 | 658 | 27  | 254 | 651 | 0.94  | 5.20E-01 | 2.84E-01 |  |  |
| rs6452796    | chr5 | 70,816,345 | 705 | 203 | 11  | 721 | 190 | 18  | 0.993 | 9.80E-01 | 8.77E-03 |  |  |
| rs7444322    | chr5 | 70,817,510 | 26  | 237 | 659 | 28  | 251 | 652 | 0.941 | 5.30E-01 | 2.76E-01 |  |  |
| rs4704050    | chr5 | 70,829,327 | 397 | 419 | 106 | 399 | 422 | 109 | 1.01  | 9.30E-01 | 3.15E-02 |  |  |
| rs3761966    | chr5 | 70,836,231 | 105 | 419 | 398 | 109 | 423 | 399 | 0.986 | 8.70E-01 | 6.05E-02 |  |  |
| rs3761967    | chr5 | 70,836,294 | 227 | 470 | 225 | 228 | 456 | 248 | 1.05  | 4.90E-01 | 3.10E-01 |  |  |
| rs715748     | chr5 | 70,842,213 | 227 | 470 | 224 | 228 | 455 | 247 | 1.05  | 4.90E-01 | 3.10E-01 |  |  |
| rs421128     | chr5 | 70,842,829 | 105 | 416 | 397 | 109 | 421 | 398 | 0.985 | 8.60E-01 | 6.55E-02 |  |  |
| rs3748041    | chr5 | 70,844,925 | 253 | 471 | 198 | 274 | 454 | 204 | 0.969 | 6.60E-01 | 1.80E-01 |  |  |
| rs279322     | chr5 | 70,847,577 | 252 | 472 | 198 | 274 | 456 | 202 | 0.963 | 5.90E-01 | 2.29E-01 |  |  |
| rs277970     | chr5 | 70,863,731 | 7   | 138 | 777 | 9   | 135 | 788 | 1     | 9.80E-01 | 8.77E-03 |  |  |
| rs276590     | chr5 | 70,870,589 | 228 | 470 | 224 | 228 | 457 | 247 | 1.05  | 4.70E-01 | 3.28E-01 |  |  |
| rs277941     | chr5 | 70,893,950 | 105 | 418 | 399 | 109 | 423 | 397 | 0.981 | 8.00E-01 | 9.69E-02 |  |  |
| rs464155     | chr5 | 70,920,791 | 223 | 471 | 228 | 246 | 457 | 229 | 0.954 | 4.90E-01 | 3.10E-01 |  |  |
| rs12153571   | chr5 | 70,921,729 | 611 | 277 | 34  | 610 | 286 | 36  | 1.03  | 7.30E-01 | 1.37E-01 |  |  |
| rs277952     | chr5 | 70,948,437 | 130 | 431 | 361 | 130 | 437 | 365 | 1     | 9.90E-01 | 4.36E-03 |  |  |
| rs12516456   | chr5 | 70,958,372 | 664 | 234 | 24  | 660 | 250 | 22  | 1.04  | 7.20E-01 | 1.43E-01 |  |  |
| rs277980     | chr5 | 70,963,612 | 199 | 467 | 256 | 205 | 452 | 275 | 1.03  | 7.10E-01 | 1.49E-01 |  |  |
| rs7444180    | chr5 | 70,967,758 | 576 | 271 | 29  | 571 | 288 | 30  | 1.05  | 5.80E-01 | 2.37E-01 |  |  |
| rs2242372    | chr5 | 70,984,410 | 685 | 222 | 15  | 700 | 216 | 16  | 0.97  | 7.80E-01 | 1.08E-01 |  |  |
| rs17356585   | chr5 | 70,999,567 | 772 | 145 | 5   | 826 | 103 | 3   | 0.677 | 3.00E-03 | 2.52E+00 |  |  |
| rs277921     | chr5 | 71,000,819 | 425 | 411 | 86  | 470 | 387 | 73  | 0.869 | 5.40E-02 | 1.27E+00 |  |  |
| rs539449     | chr5 | 71,002,933 | 137 | 449 | 335 | 127 | 444 | 361 | 1.08  | 2.70E-01 | 5.69E-01 |  |  |
| rs281134     | chr5 | 71,008,018 | 145 | 417 | 360 | 131 | 437 | 364 | 1.04  | 6.20E-01 | 2.08E-01 |  |  |
| rs11949150   | chr5 | 71,010,229 | 4   | 141 | 777 | 6   | 145 | 781 | 0.956 | 7.50E-01 | 1.25E-01 |  |  |
| rs281126     | chr5 | 71,011,623 | 9   | 208 | 705 | 10  | 179 | 743 | 1.17  | 1.40E-01 | 8.54E-01 |  |  |
| rs17356884   | chr5 | 71,011,814 | 701 | 199 | 22  | 676 | 232 | 24  | 1.16  | 1.20E-01 | 9.21E-01 |  |  |

|            |      |            |     |     |     |     |     |     |       |          |          |  |  |
|------------|------|------------|-----|-----|-----|-----|-----|-----|-------|----------|----------|--|--|
| rs16870827 | chr5 | 71,012,259 | 630 | 260 | 32  | 581 | 305 | 46  | 1.27  | 4.70E-03 | 2.33E+00 |  |  |
| rs281124   | chr5 | 71,013,753 | 200 | 472 | 250 | 228 | 476 | 228 | 0.897 | 1.10E-01 | 9.59E-01 |  |  |
| rs281121   | chr5 | 71,021,778 | 843 | 77  | 2   | 840 | 90  | 2   | 1.16  | 3.90E-01 | 4.09E-01 |  |  |
| rs2115031  | chr5 | 71,022,231 | 171 | 430 | 321 | 160 | 451 | 321 | 1.02  | 7.80E-01 | 1.08E-01 |  |  |
| rs172182   | chr5 | 71,024,374 | 320 | 447 | 154 | 342 | 427 | 163 | 0.976 | 7.40E-01 | 1.31E-01 |  |  |
| rs7703100  | chr5 | 71,026,670 | 11  | 172 | 739 | 12  | 169 | 751 | 1.02  | 9.10E-01 | 4.10E-02 |  |  |
| rs2560665  | chr5 | 71,029,670 | 155 | 447 | 320 | 161 | 428 | 343 | 1.03  | 6.40E-01 | 1.94E-01 |  |  |
| rs11741424 | chr5 | 71,033,221 | 314 | 452 | 156 | 334 | 432 | 166 | 0.982 | 8.10E-01 | 9.15E-02 |  |  |
| rs6872120  | chr5 | 71,033,905 | 272 | 464 | 186 | 285 | 447 | 200 | 1     | 9.80E-01 | 8.77E-03 |  |  |
| rs6453124  | chr5 | 71,036,822 | 691 | 215 | 15  | 697 | 213 | 22  | 1.04  | 7.00E-01 | 1.55E-01 |  |  |
| rs4704168  | chr5 | 71,042,463 | 312 | 441 | 151 | 332 | 427 | 162 | 0.987 | 8.70E-01 | 6.05E-02 |  |  |
| rs10515116 | chr5 | 71,046,420 | 11  | 174 | 737 | 12  | 171 | 749 | 1.02  | 9.10E-01 | 4.10E-02 |  |  |
| rs6859438  | chr5 | 71,049,222 | 1   | 49  | 872 | 2   | 59  | 871 | 0.813 | 3.20E-01 | 4.95E-01 |  |  |
| rs3763154  | chr5 | 71,049,233 | 297 | 454 | 171 | 308 | 445 | 179 | 0.996 | 9.80E-01 | 8.77E-03 |  |  |
| rs3763153  | chr5 | 71,049,403 | 443 | 375 | 103 | 443 | 390 | 98  | 0.997 | 9.90E-01 | 4.36E-03 |  |  |
| rs3857384  | chr5 | 71,049,720 | 13  | 188 | 721 | 16  | 187 | 729 | 0.986 | 9.30E-01 | 3.15E-02 |  |  |
| rs6894758  | chr5 | 71,050,468 | 720 | 188 | 14  | 729 | 187 | 16  | 1     | 9.90E-01 | 4.36E-03 |  |  |
| rs7707837  | chr5 | 71,059,828 | 19  | 239 | 664 | 25  | 283 | 623 | 0.812 | 2.10E-02 | 1.68E+00 |  |  |
| rs13362349 | chr5 | 71,069,348 | 535 | 334 | 53  | 482 | 368 | 82  | 1.27  | 1.40E-03 | 2.85E+00 |  |  |
| rs6453135  | chr5 | 71,073,992 | 589 | 286 | 27  | 542 | 319 | 54  | 1.31  | 1.10E-03 | 2.96E+00 |  |  |
| rs16876022 | chr5 | 71,087,987 | 668 | 233 | 16  | 637 | 268 | 22  | 1.2   | 5.20E-02 | 1.28E+00 |  |  |
| rs6891713  | chr5 | 71,090,060 | 1   | 52  | 869 | 2   | 83  | 846 | 0.615 | 7.20E-03 | 2.14E+00 |  |  |
| rs16872075 | chr5 | 71,094,436 | 870 | 50  | 2   | 850 | 80  | 2   | 1.56  | 1.40E-02 | 1.85E+00 |  |  |
| rs2056169  | chr5 | 71,095,468 | 605 | 283 | 31  | 548 | 327 | 57  | 1.34  | 3.20E-04 | 3.49E+00 |  |  |
| rs9293660  | chr5 | 71,097,489 | 16  | 233 | 673 | 22  | 273 | 637 | 0.819 | 3.10E-02 | 1.51E+00 |  |  |
| rs4057815  | chr5 | 71,103,912 | 8   | 157 | 757 | 4   | 131 | 797 | 1.28  | 4.00E-02 | 1.40E+00 |  |  |
| rs13158073 | chr5 | 71,112,634 | 209 | 461 | 252 | 249 | 468 | 215 | 0.847 | 1.20E-02 | 1.92E+00 |  |  |
| rs7706490  | chr5 | 71,113,290 | 97  | 421 | 403 | 113 | 423 | 394 | 0.935 | 3.50E-01 | 4.56E-01 |  |  |
| rs17359958 | chr5 | 71,115,774 | 23  | 222 | 677 | 23  | 269 | 640 | 0.836 | 5.30E-02 | 1.28E+00 |  |  |
| rs6862707  | chr5 | 71,116,907 | 207 | 462 | 252 | 244 | 469 | 219 | 0.859 | 2.30E-02 | 1.64E+00 |  |  |
| rs1798575  | chr5 | 71,141,418 | 70  | 375 | 477 | 76  | 401 | 455 | 0.919 | 2.60E-01 | 5.85E-01 |  |  |
| rs2676252  | chr5 | 71,147,098 | 102 | 417 | 401 | 102 | 416 | 411 | 1.02  | 8.30E-01 | 8.09E-02 |  |  |
| rs2721750  | chr5 | 71,150,434 | 87  | 388 | 447 | 80  | 385 | 467 | 1.06  | 4.30E-01 | 3.67E-01 |  |  |
| rs10942773 | chr5 | 71,155,842 | 447 | 388 | 87  | 467 | 385 | 80  | 0.943 | 4.30E-01 | 3.67E-01 |  |  |
| rs1105330  | chr5 | 71,163,553 | 446 | 390 | 86  | 467 | 385 | 80  | 0.943 | 4.30E-01 | 3.67E-01 |  |  |
| rs2721775  | chr5 | 71,168,107 | 385 | 416 | 119 | 372 | 435 | 123 | 1.05  | 5.20E-01 | 2.84E-01 |  |  |
| rs4354016  | chr5 | 71,170,863 | 612 | 282 | 22  | 648 | 248 | 34  | 0.945 | 5.50E-01 | 2.60E-01 |  |  |
| rs12659543 | chr5 | 71,173,487 | 5   | 146 | 771 | 6   | 153 | 773 | 0.952 | 7.10E-01 | 1.49E-01 |  |  |
| rs4305629  | chr5 | 71,187,581 | 32  | 300 | 588 | 36  | 303 | 592 | 0.978 | 8.20E-01 | 8.62E-02 |  |  |
| rs10062158 | chr5 | 71,190,550 | 3   | 92  | 823 | 1   | 94  | 837 | 1.04  | 8.60E-01 | 6.55E-02 |  |  |
| rs1911923  | chr5 | 71,191,363 | 406 | 430 | 86  | 433 | 401 | 98  | 0.972 | 7.10E-01 | 1.49E-01 |  |  |
| rs12055280 | chr5 | 71,192,651 | 122 | 458 | 342 | 137 | 441 | 354 | 0.988 | 8.80E-01 | 5.55E-02 |  |  |
| rs16872647 | chr5 | 71,198,943 | 140 | 459 | 320 | 155 | 441 | 333 | 0.991 | 9.20E-01 | 3.62E-02 |  |  |
| rs4057254  | chr5 | 71,203,197 | 382 | 439 | 101 | 404 | 419 | 109 | 0.974 | 7.30E-01 | 1.37E-01 |  |  |
| rs6890936  | chr5 | 71,205,261 | 120 | 436 | 366 | 123 | 415 | 394 | 1.05  | 4.70E-01 | 3.28E-01 |  |  |
| rs4057256  | chr5 | 71,206,370 | 2   | 84  | 835 | 4   | 103 | 825 | 0.792 | 1.30E-01 | 8.86E-01 |  |  |
| rs10058537 | chr5 | 71,209,059 | 594 | 296 | 32  | 587 | 318 | 27  | 1.03  | 7.70E-01 | 1.14E-01 |  |  |
| rs4704363  | chr5 | 71,216,205 | 756 | 160 | 6   | 774 | 150 | 8   | 0.95  | 7.00E-01 | 1.55E-01 |  |  |
| rs6453274  | chr5 | 71,220,674 | 499 | 361 | 62  | 501 | 352 | 79  | 1.06  | 4.90E-01 | 3.10E-01 |  |  |
| rs12332541 | chr5 | 71,221,485 | 565 | 313 | 44  | 576 | 313 | 43  | 0.98  | 8.30E-01 | 8.09E-02 |  |  |
| rs6453280  | chr5 | 71,225,029 | 8   | 169 | 737 | 8   | 156 | 761 | 1.1   | 4.30E-01 | 3.67E-01 |  |  |
| rs10942814 | chr5 | 71,226,779 | 345 | 447 | 130 | 359 | 428 | 145 | 1.01  | 9.40E-01 | 2.69E-02 |  |  |
| rs4602602  | chr5 | 71,236,426 | 647 | 243 | 32  | 644 | 266 | 22  | 0.999 | 9.80E-01 | 8.77E-03 |  |  |
| rs10515110 | chr5 | 71,236,666 | 831 | 88  | 3   | 843 | 89  | 0   | 0.933 | 7.10E-01 | 1.49E-01 |  |  |
| rs2879027  | chr5 | 71,240,017 | 352 | 454 | 114 | 377 | 416 | 137 | 1     | 9.90E-01 | 4.36E-03 |  |  |
| rs3857394  | chr5 | 71,243,984 | 8   | 191 | 723 | 18  | 195 | 719 | 0.894 | 2.90E-01 | 5.38E-01 |  |  |
| rs1692383  | chr5 | 71,255,981 | 70  | 348 | 504 | 79  | 363 | 490 | 0.928 | 3.30E-01 | 4.81E-01 |  |  |
| rs16873241 | chr5 | 71,256,017 | 818 | 102 | 1   | 811 | 115 | 6   | 1.22  | 1.60E-01 | 7.96E-01 |  |  |
| rs1026507  | chr5 | 71,258,957 | 24  | 242 | 656 | 26  | 252 | 654 | 0.958 | 6.60E-01 | 1.80E-01 |  |  |
| rs1692418  | chr5 | 71,261,369 | 45  | 297 | 580 | 44  | 306 | 582 | 0.991 | 9.40E-01 | 2.69E-02 |  |  |
| rs10071437 | chr5 | 71,265,778 | 121 | 447 | 354 | 137 | 427 | 367 | 0.988 | 8.90E-01 | 5.06E-02 |  |  |
| rs1692420  | chr5 | 71,266,499 | 10  | 178 | 734 | 11  | 186 | 735 | 0.958 | 7.20E-01 | 1.43E-01 |  |  |
| rs3857397  | chr5 | 71,269,359 | 130 | 475 | 317 | 146 | 453 | 333 | 0.995 | 9.70E-01 | 1.32E-02 |  |  |
| rs1629473  | chr5 | 71,272,167 | 29  | 230 | 663 | 20  | 240 | 672 | 1.05  | 6.50E-01 | 1.87E-01 |  |  |
| rs898219   | chr5 | 71,275,894 | 353 | 446 | 123 | 356 | 446 | 130 | 1.01  | 8.50E-01 | 7.06E-02 |  |  |
| rs2125627  | chr5 | 71,277,269 | 27  | 254 | 641 | 33  | 266 | 633 | 0.925 | 4.00E-01 | 3.98E-01 |  |  |
| rs1217744  | chr5 | 71,281,566 | 2   | 95  | 819 | 4   | 106 | 817 | 0.872 | 3.70E-01 | 4.32E-01 |  |  |
| rs1217745  | chr5 | 71,281,720 | 27  | 247 | 648 | 26  | 239 | 667 | 1.05  | 5.80E-01 | 2.37E-01 |  |  |
| rs1217750  | chr5 | 71,285,196 | 47  | 332 | 543 | 44  | 309 | 579 | 1.11  | 2.00E-01 | 6.99E-01 |  |  |
| rs2662334  | chr5 | 71,285,696 | 85  | 397 | 440 | 93  | 403 | 436 | 0.961 | 6.00E-01 | 2.22E-01 |  |  |

|            |      |            |     |     |     |     |     |     |       |          |          |  |  |
|------------|------|------------|-----|-----|-----|-----|-----|-----|-------|----------|----------|--|--|
| rs2610424  | chr5 | 71,292,415 | 290 | 460 | 172 | 303 | 479 | 150 | 0.929 | 2.80E-01 | 5.53E-01 |  |  |
| rs2250816  | chr5 | 71,293,761 | 391 | 414 | 104 | 387 | 399 | 119 | 1.04  | 5.60E-01 | 2.52E-01 |  |  |
| rs1217824  | chr5 | 71,296,429 | 334 | 429 | 159 | 325 | 455 | 152 | 1.01  | 9.20E-01 | 3.62E-02 |  |  |
| rs2662317  | chr5 | 71,302,469 | 32  | 262 | 628 | 36  | 279 | 617 | 0.926 | 3.90E-01 | 4.09E-01 |  |  |
| rs1217736  | chr5 | 71,304,705 | 110 | 400 | 412 | 106 | 396 | 430 | 1.05  | 5.40E-01 | 2.68E-01 |  |  |
| rs6453365  | chr5 | 71,308,844 | 33  | 265 | 624 | 38  | 279 | 615 | 0.93  | 4.10E-01 | 3.87E-01 |  |  |
| rs962512   | chr5 | 71,321,316 | 921 | 0   | 1   | 930 | 2   | 0   | 0.989 | 1.00E+00 | 0.00E+00 |  |  |
| rs1344024  | chr5 | 71,326,135 | 0   | 3   | 918 | 1   | 0   | 930 | 1.52  | 6.90E-01 | 1.61E-01 |  |  |
| rs13187253 | chr5 | 71,330,913 | 33  | 263 | 626 | 37  | 279 | 616 | 0.93  | 4.10E-01 | 3.87E-01 |  |  |
| rs7704592  | chr5 | 71,331,087 | 624 | 266 | 32  | 615 | 279 | 38  | 1.08  | 3.90E-01 | 4.09E-01 |  |  |
| rs1217770  | chr5 | 71,343,136 | 453 | 393 | 76  | 473 | 382 | 77  | 0.962 | 6.20E-01 | 2.08E-01 |  |  |
| rs1692423  | chr5 | 71,355,018 | 30  | 246 | 646 | 21  | 246 | 665 | 1.09  | 3.70E-01 | 4.32E-01 |  |  |
| rs1217760  | chr5 | 71,365,042 | 422 | 402 | 98  | 424 | 412 | 96  | 0.999 | 9.90E-01 | 4.36E-03 |  |  |
| rs1692356  | chr5 | 71,383,640 | 682 | 221 | 19  | 704 | 211 | 17  | 0.926 | 4.50E-01 | 3.47E-01 |  |  |
| rs1692395  | chr5 | 71,389,241 | 19  | 220 | 683 | 17  | 212 | 703 | 1.07  | 5.10E-01 | 2.92E-01 |  |  |
| rs1692404  | chr5 | 71,395,533 | 639 | 252 | 28  | 651 | 256 | 25  | 0.976 | 8.10E-01 | 9.15E-02 |  |  |
| rs1026508  | chr5 | 71,400,037 | 64  | 376 | 482 | 74  | 400 | 458 | 0.903 | 1.70E-01 | 7.70E-01 |  |  |
| rs1217778  | chr5 | 71,402,652 | 20  | 205 | 696 | 16  | 219 | 697 | 0.986 | 9.20E-01 | 3.62E-02 |  |  |
| rs1217785  | chr5 | 71,404,593 | 242 | 465 | 215 | 248 | 442 | 242 | 1.05  | 5.10E-01 | 2.92E-01 |  |  |
| rs16874468 | chr5 | 71,405,201 | 13  | 194 | 715 | 19  | 208 | 705 | 0.891 | 2.70E-01 | 5.69E-01 |  |  |
| rs1217791  | chr5 | 71,406,940 | 63  | 375 | 483 | 74  | 401 | 456 | 0.894 | 1.30E-01 | 8.86E-01 |  |  |
| rs1217793  | chr5 | 71,408,637 | 16  | 185 | 721 | 13  | 197 | 722 | 0.981 | 8.90E-01 | 5.06E-02 |  |  |
| rs1217795  | chr5 | 71,411,270 | 16  | 186 | 720 | 13  | 197 | 722 | 0.987 | 9.30E-01 | 3.15E-02 |  |  |
| rs17300302 | chr5 | 71,411,721 | 42  | 310 | 570 | 41  | 295 | 596 | 1.07  | 4.10E-01 | 3.87E-01 |  |  |
| rs1217800  | chr5 | 71,412,888 | 147 | 444 | 331 | 156 | 423 | 352 | 1.02  | 7.60E-01 | 1.19E-01 |  |  |
| rs17300532 | chr5 | 71,416,111 | 61  | 359 | 502 | 55  | 359 | 518 | 1.05  | 5.40E-01 | 2.68E-01 |  |  |
| rs6897294  | chr5 | 71,416,670 | 488 | 361 | 64  | 507 | 354 | 63  | 0.959 | 6.10E-01 | 2.15E-01 |  |  |
| rs1217806  | chr5 | 71,417,118 | 350 | 444 | 128 | 369 | 436 | 127 | 0.961 | 5.80E-01 | 2.37E-01 |  |  |
| rs1217816  | chr5 | 71,424,094 | 299 | 453 | 170 | 320 | 427 | 185 | 0.99  | 9.10E-01 | 4.10E-02 |  |  |
| rs1217823  | chr5 | 71,429,871 | 121 | 418 | 383 | 133 | 428 | 370 | 0.938 | 3.70E-01 | 4.32E-01 |  |  |
| rs3112400  | chr5 | 71,430,625 | 611 | 276 | 35  | 603 | 297 | 32  | 1.04  | 6.70E-01 | 1.74E-01 |  |  |
| rs6880685  | chr5 | 71,433,805 | 25  | 250 | 647 | 35  | 240 | 657 | 0.974 | 8.00E-01 | 9.69E-02 |  |  |
| rs2337390  | chr5 | 71,444,623 | 79  | 359 | 484 | 65  | 386 | 481 | 1.02  | 8.40E-01 | 7.57E-02 |  |  |
| rs7732739  | chr5 | 71,445,139 | 579 | 298 | 44  | 578 | 299 | 54  | 1.06  | 5.30E-01 | 2.76E-01 |  |  |
| rs3101186  | chr5 | 71,445,325 | 25  | 265 | 631 | 19  | 276 | 637 | 1.02  | 8.70E-01 | 6.05E-02 |  |  |
| rs1531312  | chr5 | 71,447,474 | 82  | 368 | 471 | 75  | 393 | 463 | 0.986 | 8.80E-01 | 5.55E-02 |  |  |
| rs1466344  | chr5 | 71,449,384 | 12  | 177 | 722 | 14  | 176 | 738 | 1     | 9.90E-01 | 4.36E-03 |  |  |
| rs1459215  | chr5 | 71,450,356 | 230 | 460 | 229 | 230 | 450 | 251 | 1.05  | 4.90E-01 | 3.10E-01 |  |  |
| rs3101187  | chr5 | 71,452,383 | 708 | 198 | 16  | 715 | 198 | 19  | 1.02  | 9.00E-01 | 4.58E-02 |  |  |
| rs10474585 | chr5 | 71,457,764 | 146 | 450 | 325 | 151 | 457 | 323 | 0.98  | 7.90E-01 | 1.02E-01 |  |  |
| rs4704553  | chr5 | 71,466,651 | 147 | 476 | 299 | 159 | 448 | 325 | 1.03  | 7.10E-01 | 1.49E-01 |  |  |
| rs4704554  | chr5 | 71,467,472 | 147 | 476 | 299 | 159 | 447 | 326 | 1.03  | 6.80E-01 | 1.67E-01 |  |  |
| rs4703774  | chr5 | 71,473,018 | 78  | 406 | 437 | 108 | 378 | 443 | 0.934 | 3.60E-01 | 4.44E-01 |  |  |
| rs4569852  | chr5 | 71,477,345 | 425 | 401 | 96  | 438 | 395 | 99  | 0.984 | 8.50E-01 | 7.06E-02 |  |  |
| rs12655013 | chr5 | 71,486,711 | 730 | 177 | 15  | 758 | 155 | 19  | 0.913 | 4.20E-01 | 3.77E-01 |  |  |
| rs6872830  | chr5 | 71,489,931 | 14  | 232 | 676 | 24  | 245 | 663 | 0.88  | 1.80E-01 | 7.45E-01 |  |  |
| rs2337692  | chr5 | 71,491,374 | 57  | 351 | 514 | 61  | 357 | 514 | 0.975 | 7.70E-01 | 1.14E-01 |  |  |
| rs10063919 | chr5 | 71,491,849 | 2   | 96  | 824 | 3   | 121 | 808 | 0.784 | 9.00E-02 | 1.05E+00 |  |  |
| rs1545170  | chr5 | 71,492,764 | 702 | 199 | 8   | 665 | 226 | 17  | 1.25  | 2.90E-02 | 1.54E+00 |  |  |
| rs17301591 | chr5 | 71,497,821 | 41  | 310 | 571 | 30  | 315 | 587 | 1.07  | 4.10E-01 | 3.87E-01 |  |  |
| rs3098378  | chr5 | 71,503,426 | 329 | 450 | 143 | 367 | 434 | 129 | 0.892 | 9.70E-02 | 1.01E+00 |  |  |
| rs2118695  | chr5 | 71,507,085 | 111 | 394 | 417 | 135 | 416 | 381 | 0.861 | 3.30E-02 | 1.48E+00 |  |  |
| rs12186804 | chr5 | 71,507,469 | 587 | 305 | 29  | 625 | 283 | 22  | 0.869 | 1.10E-01 | 9.59E-01 |  |  |
| rs10055619 | chr5 | 71,510,030 | 9   | 195 | 718 | 13  | 190 | 729 | 0.996 | 9.90E-01 | 4.36E-03 |  |  |
| rs2196760  | chr5 | 71,510,043 | 118 | 424 | 380 | 120 | 423 | 389 | 1.01  | 9.10E-01 | 4.10E-02 |  |  |
| rs2337694  | chr5 | 71,512,661 | 23  | 248 | 650 | 27  | 261 | 644 | 0.934 | 4.70E-01 | 3.28E-01 |  |  |
| rs2028260  | chr5 | 71,512,713 | 391 | 441 | 89  | 387 | 445 | 100 | 1.05  | 5.40E-01 | 2.68E-01 |  |  |
| rs6874186  | chr5 | 71,512,871 | 402 | 415 | 105 | 416 | 409 | 107 | 0.979 | 7.90E-01 | 1.02E-01 |  |  |
| rs3792806  | chr5 | 71,517,643 | 601 | 287 | 34  | 604 | 299 | 29  | 0.994 | 9.70E-01 | 1.32E-02 |  |  |
| rs16875959 | chr5 | 71,519,497 | 11  | 205 | 705 | 10  | 169 | 752 | 1.24  | 4.10E-02 | 1.39E+00 |  |  |
| rs1561398  | chr5 | 71,522,541 | 49  | 353 | 519 | 48  | 337 | 547 | 1.07  | 3.90E-01 | 4.09E-01 |  |  |
| rs7736611  | chr5 | 71,524,660 | 125 | 437 | 360 | 126 | 435 | 371 | 1.02  | 8.30E-01 | 8.09E-02 |  |  |
| rs1866374  | chr5 | 71,526,718 | 30  | 244 | 648 | 23  | 273 | 636 | 0.956 | 6.40E-01 | 1.94E-01 |  |  |
| rs13153166 | chr5 | 71,530,687 | 822 | 95  | 5   | 844 | 86  | 2   | 0.84  | 2.70E-01 | 5.69E-01 |  |  |
| rs3805452  | chr5 | 71,530,797 | 529 | 333 | 60  | 513 | 364 | 55  | 1.05  | 5.70E-01 | 2.44E-01 |  |  |
| rs3828616  | chr5 | 71,532,175 | 418 | 410 | 94  | 413 | 426 | 93  | 1.02  | 8.20E-01 | 8.62E-02 |  |  |
| rs930391   | chr5 | 71,539,443 | 700 | 201 | 12  | 687 | 226 | 11  | 1.1   | 3.50E-01 | 4.56E-01 |  |  |
| rs10039706 | chr5 | 71,542,190 | 157 | 458 | 307 | 181 | 440 | 311 | 0.954 | 5.00E-01 | 3.01E-01 |  |  |
| rs17302844 | chr5 | 71,546,745 | 108 | 416 | 398 | 111 | 433 | 388 | 0.962 | 6.00E-01 | 2.22E-01 |  |  |
| rs2289281  | chr5 | 71,557,438 | 718 | 194 | 10  | 743 | 182 | 7   | 0.895 | 3.10E-01 | 5.09E-01 |  |  |

|            |      |            |     |     |     |     |     |     |       |          |          |  |  |
|------------|------|------------|-----|-----|-----|-----|-----|-----|-------|----------|----------|--|--|
| rs3213894  | chr5 | 71,563,866 | 405 | 403 | 114 | 390 | 428 | 114 | 1.04  | 5.60E-01 | 2.52E-01 |  |  |
| rs10073728 | chr5 | 71,567,938 | 698 | 208 | 16  | 715 | 200 | 16  | 0.951 | 6.50E-01 | 1.87E-01 |  |  |
| rs12697910 | chr5 | 71,570,309 | 2   | 87  | 833 | 2   | 89  | 841 | 0.989 | 1.00E+00 | 0.00E+00 |  |  |
| rs11956209 | chr5 | 71,570,610 | 749 | 166 | 7   | 727 | 196 | 9   | 1.2   | 1.00E-01 | 1.00E+00 |  |  |
| rs4434362  | chr5 | 71,575,797 | 918 | 3   | 1   | 931 | 1   | 0   | 0.197 | 1.20E-01 | 9.21E-01 |  |  |
| rs2289279  | chr5 | 71,577,959 | 681 | 223 | 18  | 687 | 227 | 18  | 1.01  | 9.90E-01 | 4.36E-03 |  |  |
| rs10454918 | chr5 | 71,578,770 | 41  | 357 | 524 | 59  | 358 | 513 | 0.908 | 2.20E-01 | 6.58E-01 |  |  |
| rs7710169  | chr5 | 71,584,804 | 1   | 53  | 867 | 2   | 52  | 878 | 0.994 | 9.50E-01 | 2.23E-02 |  |  |
| rs4703813  | chr5 | 71,587,943 | 11  | 183 | 728 | 9   | 190 | 733 | 0.996 | 9.90E-01 | 4.36E-03 |  |  |
| rs11749445 | chr5 | 71,603,661 | 469 | 379 | 59  | 523 | 338 | 56  | 0.862 | 5.30E-02 | 1.28E+00 |  |  |
| rs2047588  | chr5 | 71,614,658 | 380 | 437 | 103 | 373 | 431 | 126 | 1.08  | 2.80E-01 | 5.53E-01 |  |  |
| rs9293273  | chr5 | 71,657,184 | 29  | 286 | 604 | 33  | 263 | 635 | 1.07  | 4.30E-01 | 3.67E-01 |  |  |
| rs10942271 | chr5 | 71,670,468 | 725 | 182 | 11  | 732 | 186 | 9   | 0.989 | 9.60E-01 | 1.77E-02 |  |  |
| rs7734699  | chr5 | 71,690,514 | 871 | 51  | 0   | 879 | 51  | 0   | 0.991 | 9.60E-01 | 1.77E-02 |  |  |
| rs10223066 | chr5 | 71,697,344 | 475 | 387 | 60  | 521 | 352 | 59  | 0.889 | 1.20E-01 | 9.21E-01 |  |  |
| rs4507472  | chr5 | 71,702,830 | 112 | 407 | 403 | 110 | 427 | 395 | 0.978 | 7.80E-01 | 1.08E-01 |  |  |
| rs9293282  | chr5 | 71,703,434 | 12  | 194 | 716 | 13  | 180 | 739 | 1.08  | 4.90E-01 | 3.10E-01 |  |  |
| rs9293289  | chr5 | 71,719,641 | 72  | 380 | 469 | 89  | 387 | 456 | 0.914 | 2.30E-01 | 6.38E-01 |  |  |
| rs13158670 | chr5 | 71,723,979 | 186 | 497 | 239 | 186 | 448 | 298 | 1.13  | 6.00E-02 | 1.22E+00 |  |  |
| rs11750874 | chr5 | 71,726,098 | 10  | 169 | 743 | 10  | 188 | 734 | 0.909 | 4.00E-01 | 3.98E-01 |  |  |
| rs4703854  | chr5 | 71,729,219 | 548 | 307 | 50  | 539 | 325 | 48  | 1.03  | 7.00E-01 | 1.55E-01 |  |  |
| rs4703855  | chr5 | 71,729,655 | 79  | 395 | 446 | 97  | 407 | 428 | 0.903 | 1.60E-01 | 7.96E-01 |  |  |
| rs10040192 | chr5 | 71,731,636 | 239 | 442 | 241 | 216 | 468 | 248 | 1.07  | 3.40E-01 | 4.69E-01 |  |  |
| rs7445013  | chr5 | 71,733,733 | 262 | 459 | 201 | 240 | 480 | 212 | 1.08  | 2.90E-01 | 5.38E-01 |  |  |
| rs2338216  | chr5 | 71,737,570 | 198 | 460 | 264 | 211 | 480 | 241 | 0.924 | 2.40E-01 | 6.20E-01 |  |  |
| rs16878312 | chr5 | 71,741,140 | 72  | 374 | 473 | 82  | 386 | 464 | 0.938 | 3.90E-01 | 4.09E-01 |  |  |
| rs6452453  | chr5 | 71,748,955 | 557 | 313 | 52  | 549 | 333 | 50  | 1.04  | 6.80E-01 | 1.67E-01 |  |  |
| rs7723734  | chr5 | 71,753,361 | 394 | 413 | 115 | 387 | 430 | 115 | 1.02  | 7.60E-01 | 1.19E-01 |  |  |
| rs13180645 | chr5 | 71,755,940 | 6   | 135 | 781 | 4   | 133 | 795 | 1.06  | 6.90E-01 | 1.61E-01 |  |  |
| rs4703872  | chr5 | 71,759,400 | 197 | 460 | 264 | 212 | 478 | 242 | 0.922 | 2.30E-01 | 6.38E-01 |  |  |
| rs6452473  | chr5 | 71,776,850 | 14  | 186 | 720 | 17  | 201 | 714 | 0.912 | 3.90E-01 | 4.09E-01 |  |  |
| rs17378840 | chr5 | 71,777,912 | 55  | 369 | 498 | 59  | 340 | 533 | 1.08  | 3.40E-01 | 4.69E-01 |  |  |
| rs13177417 | chr5 | 71,779,710 | 136 | 441 | 345 | 137 | 450 | 345 | 0.993 | 9.40E-01 | 2.69E-02 |  |  |
| rs10068109 | chr5 | 71,779,955 | 14  | 181 | 726 | 16  | 198 | 718 | 0.909 | 3.80E-01 | 4.20E-01 |  |  |
| rs10070001 | chr5 | 71,780,420 | 61  | 412 | 449 | 84  | 398 | 449 | 0.933 | 3.60E-01 | 4.44E-01 |  |  |
| rs16878635 | chr5 | 71,783,204 | 31  | 299 | 592 | 37  | 294 | 601 | 0.99  | 9.30E-01 | 3.15E-02 |  |  |
| rs3112482  | chr5 | 71,786,656 | 3   | 82  | 837 | 10  | 103 | 819 | 0.709 | 2.00E-02 | 1.70E+00 |  |  |
| rs6862221  | chr5 | 71,790,718 | 602 | 290 | 29  | 600 | 296 | 35  | 1.05  | 5.80E-01 | 2.37E-01 |  |  |
| rs7721922  | chr5 | 71,791,858 | 96  | 423 | 403 | 106 | 425 | 401 | 0.964 | 6.20E-01 | 2.08E-01 |  |  |
| rs2278600  | chr5 | 71,792,426 | 22  | 222 | 678 | 21  | 232 | 679 | 0.978 | 8.50E-01 | 7.06E-02 |  |  |
| rs12054660 | chr5 | 71,796,031 | 761 | 156 | 2   | 785 | 137 | 10  | 0.965 | 8.00E-01 | 9.69E-02 |  |  |
| rs1019457  | chr5 | 71,798,910 | 48  | 361 | 513 | 53  | 347 | 532 | 1.03  | 7.60E-01 | 1.19E-01 |  |  |
| rs6874676  | chr5 | 71,799,471 | 509 | 339 | 74  | 503 | 372 | 57  | 0.983 | 8.40E-01 | 7.57E-02 |  |  |
| rs1421968  | chr5 | 71,802,075 | 801 | 118 | 3   | 833 | 95  | 4   | 0.811 | 1.50E-01 | 8.24E-01 |  |  |
| rs4703910  | chr5 | 71,807,866 | 580 | 313 | 29  | 585 | 308 | 39  | 1.04  | 6.90E-01 | 1.61E-01 |  |  |
| rs10043659 | chr5 | 71,817,595 | 580 | 310 | 32  | 579 | 311 | 42  | 1.06  | 5.20E-01 | 2.84E-01 |  |  |
| rs246565   | chr5 | 71,845,003 | 25  | 282 | 615 | 32  | 286 | 614 | 0.95  | 5.70E-01 | 2.44E-01 |  |  |
| rs246580   | chr5 | 71,851,370 | 25  | 278 | 619 | 32  | 284 | 616 | 0.943 | 5.10E-01 | 2.92E-01 |  |  |
| rs165986   | chr5 | 71,857,770 | 28  | 287 | 607 | 34  | 298 | 600 | 0.935 | 4.50E-01 | 3.47E-01 |  |  |
| rs381734   | chr5 | 71,879,511 | 35  | 326 | 559 | 46  | 328 | 554 | 0.938 | 4.40E-01 | 3.57E-01 |  |  |
| rs16899650 | chr5 | 71,883,978 | 0   | 2   | 920 | 0   | 1   | 931 | 2.02  | 6.20E-01 | 2.08E-01 |  |  |
| rs1379263  | chr5 | 71,885,325 | 9   | 149 | 764 | 8   | 170 | 754 | 0.898 | 3.70E-01 | 4.32E-01 |  |  |
| rs16899839 | chr5 | 71,907,547 | 919 | 3   | 0   | 931 | 1   | 0   | 0.329 | 3.70E-01 | 4.32E-01 |  |  |
| rs42775    | chr5 | 71,916,270 | 81  | 409 | 432 | 77  | 412 | 443 | 1.03  | 7.20E-01 | 1.43E-01 |  |  |
| rs33424    | chr5 | 71,918,365 | 434 | 405 | 81  | 441 | 411 | 76  | 0.978 | 7.80E-01 | 1.08E-01 |  |  |
| rs33425    | chr5 | 71,928,668 | 327 | 454 | 139 | 335 | 451 | 146 | 1     | 9.90E-01 | 4.36E-03 |  |  |
| rs636926   | chr5 | 72,455,373 | 61  | 359 | 502 | 54  | 363 | 514 | 1.04  | 6.10E-01 | 2.15E-01 |  |  |
| rs570888   | chr5 | 72,457,774 | 61  | 358 | 503 | 54  | 363 | 515 | 1.04  | 6.20E-01 | 2.08E-01 |  |  |
| rs703871   | chr5 | 72,461,417 | 522 | 341 | 58  | 530 | 332 | 70  | 1.03  | 7.50E-01 | 1.25E-01 |  |  |
| rs1083428  | chr5 | 72,462,531 | 549 | 315 | 52  | 562 | 306 | 62  | 1.01  | 8.90E-01 | 5.06E-02 |  |  |
| rs488174   | chr5 | 72,465,102 | 1   | 55  | 866 | 2   | 50  | 880 | 1.07  | 8.00E-01 | 9.69E-02 |  |  |
| rs549579   | chr5 | 72,467,213 | 225 | 428 | 269 | 201 | 436 | 295 | 1.11  | 1.10E-01 | 9.59E-01 |  |  |
| rs13160226 | chr5 | 72,469,980 | 539 | 315 | 68  | 538 | 334 | 60  | 0.995 | 9.70E-01 | 1.32E-02 |  |  |
| rs471507   | chr5 | 72,470,057 | 156 | 389 | 377 | 183 | 403 | 346 | 0.873 | 4.70E-02 | 1.33E+00 |  |  |
| rs484573   | chr5 | 72,476,863 | 9   | 154 | 759 | 16  | 165 | 749 | 0.868 | 2.20E-01 | 6.58E-01 |  |  |
| rs648441   | chr5 | 72,482,521 | 157 | 389 | 376 | 184 | 409 | 339 | 0.862 | 2.90E-02 | 1.54E+00 |  |  |
| rs71542    | chr5 | 72,487,477 | 669 | 231 | 22  | 686 | 223 | 23  | 0.962 | 7.10E-01 | 1.49E-01 |  |  |
| rs7720612  | chr5 | 72,490,276 | 788 | 127 | 7   | 799 | 130 | 3   | 0.951 | 7.30E-01 | 1.37E-01 |  |  |
| rs9293528  | chr5 | 72,492,023 | 694 | 213 | 15  | 727 | 190 | 15  | 0.882 | 2.20E-01 | 6.58E-01 |  |  |
| rs17731153 | chr5 | 72,492,177 | 66  | 312 | 537 | 58  | 312 | 557 | 1.07  | 4.20E-01 | 3.77E-01 |  |  |

|            |      |            |     |     |     |     |     |     |       |          |          |  |  |
|------------|------|------------|-----|-----|-----|-----|-----|-----|-------|----------|----------|--|--|
| rs1457139  | chr5 | 72,492,876 | 344 | 425 | 141 | 357 | 423 | 144 | 0.984 | 8.40E-01 | 7.57E-02 |  |  |
| rs575415   | chr5 | 72,495,882 | 733 | 181 | 8   | 735 | 186 | 11  | 1.05  | 6.80E-01 | 1.67E-01 |  |  |
| rs576243   | chr5 | 72,495,951 | 16  | 243 | 663 | 30  | 227 | 675 | 0.963 | 7.20E-01 | 1.43E-01 |  |  |
| rs6879012  | chr5 | 72,498,637 | 99  | 346 | 477 | 101 | 376 | 455 | 0.931 | 3.40E-01 | 4.69E-01 |  |  |
| rs3733859  | chr5 | 72,508,520 | 435 | 392 | 95  | 450 | 400 | 82  | 0.941 | 4.10E-01 | 3.87E-01 |  |  |
| rs6893265  | chr5 | 72,509,655 | 681 | 220 | 21  | 677 | 226 | 29  | 1.09  | 4.00E-01 | 3.98E-01 |  |  |
| rs7702108  | chr5 | 72,529,022 | 263 | 465 | 194 | 279 | 443 | 210 | 1     | 9.90E-01 | 4.36E-03 |  |  |
| rs4416586  | chr5 | 72,530,549 | 186 | 459 | 277 | 194 | 447 | 291 | 1.01  | 9.00E-01 | 4.58E-02 |  |  |
| rs4703597  | chr5 | 72,531,935 | 7   | 144 | 771 | 2   | 158 | 772 | 0.985 | 9.40E-01 | 2.69E-02 |  |  |
| rs3935430  | chr5 | 72,536,852 | 289 | 460 | 173 | 273 | 456 | 203 | 1.11  | 1.30E-01 | 8.86E-01 |  |  |
| rs4457052  | chr5 | 72,564,678 | 420 | 406 | 96  | 426 | 395 | 111 | 1.03  | 6.90E-01 | 1.61E-01 |  |  |
| rs4540159  | chr5 | 72,582,234 | 486 | 348 | 86  | 500 | 349 | 83  | 0.969 | 7.00E-01 | 1.55E-01 |  |  |
| rs7702331  | chr5 | 72,586,890 | 349 | 422 | 151 | 374 | 405 | 153 | 0.954 | 5.10E-01 | 2.92E-01 |  |  |
| rs13155213 | chr5 | 72,587,093 | 490 | 346 | 86  | 498 | 350 | 84  | 0.985 | 8.70E-01 | 6.05E-02 |  |  |
| rs4703599  | chr5 | 72,597,052 | 42  | 251 | 629 | 19  | 277 | 636 | 1.09  | 3.30E-01 | 4.81E-01 |  |  |
| rs4704066  | chr5 | 72,601,244 | 184 | 475 | 263 | 201 | 435 | 295 | 1.03  | 6.60E-01 | 1.80E-01 |  |  |
| rs7727448  | chr5 | 72,605,701 | 312 | 443 | 164 | 311 | 437 | 182 | 1.05  | 5.10E-01 | 2.92E-01 |  |  |
| rs13165516 | chr5 | 72,612,771 | 488 | 371 | 63  | 500 | 367 | 65  | 0.985 | 8.70E-01 | 6.05E-02 |  |  |
| rs4235676  | chr5 | 72,614,799 | 57  | 345 | 520 | 51  | 340 | 541 | 1.07  | 4.20E-01 | 3.77E-01 |  |  |
| rs4422515  | chr5 | 72,623,211 | 325 | 455 | 142 | 343 | 415 | 174 | 1.04  | 6.20E-01 | 2.08E-01 |  |  |
| rs4703603  | chr5 | 72,628,339 | 474 | 373 | 74  | 469 | 372 | 91  | 1.07  | 3.50E-01 | 4.56E-01 |  |  |
| rs4704077  | chr5 | 72,632,403 | 148 | 408 | 366 | 138 | 432 | 362 | 1.01  | 9.30E-01 | 3.15E-02 |  |  |
| rs9293560  | chr5 | 72,637,254 | 242 | 466 | 214 | 265 | 447 | 220 | 0.965 | 6.10E-01 | 2.15E-01 |  |  |
| rs9293561  | chr5 | 72,639,843 | 55  | 308 | 559 | 50  | 309 | 573 | 1.04  | 6.20E-01 | 2.08E-01 |  |  |
| rs4389670  | chr5 | 72,646,286 | 407 | 414 | 101 | 420 | 409 | 103 | 0.982 | 8.20E-01 | 8.62E-02 |  |  |
| rs4582254  | chr5 | 72,646,950 | 263 | 465 | 194 | 294 | 441 | 197 | 0.943 | 3.90E-01 | 4.09E-01 |  |  |
| rs3922417  | chr5 | 72,655,258 | 739 | 174 | 9   | 748 | 171 | 13  | 1.02  | 9.20E-01 | 3.62E-02 |  |  |
| rs2972195  | chr5 | 72,656,100 | 579 | 313 | 23  | 604 | 280 | 41  | 0.997 | 1.00E+00 | 0.00E+00 |  |  |
| rs6895622  | chr5 | 72,660,292 | 11  | 228 | 683 | 20  | 210 | 702 | 1.01  | 9.30E-01 | 3.15E-02 |  |  |
| rs4704082  | chr5 | 72,685,941 | 394 | 423 | 104 | 381 | 432 | 119 | 1.08  | 3.00E-01 | 5.23E-01 |  |  |
| rs4443403  | chr5 | 72,690,060 | 722 | 191 | 9   | 741 | 182 | 9   | 0.94  | 5.90E-01 | 2.29E-01 |  |  |
| rs4515275  | chr5 | 72,690,217 | 842 | 78  | 2   | 856 | 74  | 2   | 0.938 | 7.50E-01 | 1.25E-01 |  |  |
| rs6452972  | chr5 | 72,695,929 | 2   | 121 | 799 | 3   | 115 | 814 | 1.05  | 7.80E-01 | 1.08E-01 |  |  |
| rs2972212  | chr5 | 72,696,541 | 289 | 459 | 174 | 273 | 476 | 182 | 1.06  | 4.30E-01 | 3.67E-01 |  |  |
| rs6875658  | chr5 | 72,706,878 | 766 | 147 | 9   | 777 | 147 | 8   | 0.975 | 8.70E-01 | 6.05E-02 |  |  |
| rs4639198  | chr5 | 72,710,994 | 793 | 125 | 4   | 815 | 109 | 8   | 0.925 | 5.90E-01 | 2.29E-01 |  |  |
| rs4418079  | chr5 | 72,726,876 | 19  | 223 | 679 | 18  | 210 | 703 | 1.08  | 4.20E-01 | 3.77E-01 |  |  |
| rs6863278  | chr5 | 72,727,144 | 3   | 124 | 795 | 4   | 115 | 813 | 1.07  | 6.30E-01 | 2.10E-01 |  |  |
| rs958583   | chr5 | 72,758,558 | 97  | 381 | 442 | 93  | 423 | 409 | 0.926 | 2.90E-01 | 5.38E-01 |  |  |
| rs874973   | chr5 | 72,773,651 | 788 | 129 | 5   | 811 | 112 | 9   | 0.92  | 5.50E-01 | 2.60E-01 |  |  |
| rs1449272  | chr5 | 72,785,919 | 787 | 130 | 5   | 811 | 112 | 9   | 0.913 | 5.10E-01 | 2.92E-01 |  |  |
| rs968660   | chr5 | 72,803,922 | 6   | 94  | 822 | 5   | 107 | 820 | 0.911 | 5.40E-01 | 2.68E-01 |  |  |
| rs347251   | chr5 | 72,807,818 | 88  | 408 | 426 | 92  | 408 | 431 | 0.994 | 9.60E-01 | 1.77E-02 |  |  |
| rs12659487 | chr5 | 72,820,607 | 7   | 95  | 820 | 5   | 110 | 817 | 0.913 | 5.50E-01 | 2.60E-01 |  |  |
| rs347243   | chr5 | 72,826,449 | 504 | 356 | 62  | 495 | 369 | 67  | 1.05  | 5.20E-01 | 2.84E-01 |  |  |
| rs17663872 | chr5 | 72,827,065 | 748 | 163 | 11  | 758 | 165 | 9   | 0.976 | 8.70E-01 | 6.05E-02 |  |  |
| rs347245   | chr5 | 72,828,807 | 124 | 443 | 354 | 138 | 432 | 362 | 0.98  | 7.90E-01 | 1.02E-01 |  |  |
| rs2298890  | chr5 | 72,837,683 | 7   | 94  | 821 | 5   | 109 | 818 | 0.912 | 5.50E-01 | 2.60E-01 |  |  |
| rs7703551  | chr5 | 72,842,274 | 821 | 95  | 6   | 819 | 108 | 5   | 1.1   | 5.50E-01 | 2.60E-01 |  |  |
| rs10064416 | chr5 | 72,844,806 | 2   | 114 | 806 | 4   | 112 | 816 | 0.994 | 9.80E-01 | 8.77E-03 |  |  |
| rs2914544  | chr5 | 72,845,587 | 210 | 471 | 241 | 199 | 470 | 263 | 1.07  | 3.00E-01 | 5.23E-01 |  |  |
| rs10462345 | chr5 | 72,846,913 | 678 | 225 | 19  | 664 | 248 | 20  | 1.1   | 3.30E-01 | 4.81E-01 |  |  |
| rs6453008  | chr5 | 72,851,543 | 291 | 439 | 192 | 254 | 467 | 211 | 1.13  | 6.60E-02 | 1.18E+00 |  |  |
| rs3857374  | chr5 | 72,854,468 | 277 | 439 | 204 | 247 | 464 | 220 | 1.11  | 1.30E-01 | 8.86E-01 |  |  |
| rs819561   | chr5 | 72,854,962 | 29  | 258 | 635 | 29  | 280 | 623 | 0.934 | 4.50E-01 | 3.47E-01 |  |  |
| rs819557   | chr5 | 72,857,853 | 370 | 414 | 136 | 325 | 468 | 136 | 1.11  | 1.20E-01 | 9.21E-01 |  |  |
| rs865340   | chr5 | 72,858,222 | 13  | 213 | 696 | 17  | 223 | 692 | 0.931 | 4.90E-01 | 3.10E-01 |  |  |
| rs12651911 | chr5 | 72,858,386 | 524 | 350 | 47  | 506 | 367 | 57  | 1.1   | 2.30E-01 | 6.38E-01 |  |  |
| rs819550   | chr5 | 72,860,712 | 355 | 438 | 129 | 361 | 433 | 138 | 1.01  | 8.80E-01 | 5.55E-02 |  |  |
| rs819571   | chr5 | 72,863,969 | 17  | 206 | 699 | 19  | 232 | 680 | 0.882 | 2.10E-01 | 6.78E-01 |  |  |
| rs17663979 | chr5 | 72,865,786 | 4   | 76  | 842 | 3   | 86  | 843 | 0.919 | 6.40E-01 | 1.94E-01 |  |  |
| rs819569   | chr5 | 72,867,949 | 339 | 437 | 146 | 301 | 469 | 162 | 1.13  | 6.70E-02 | 1.17E+00 |  |  |
| rs819600   | chr5 | 72,873,338 | 148 | 454 | 320 | 126 | 464 | 342 | 1.1   | 1.70E-01 | 7.70E-01 |  |  |
| rs819591   | chr5 | 72,879,536 | 572 | 311 | 34  | 542 | 342 | 46  | 1.17  | 5.50E-02 | 1.26E+00 |  |  |
| rs703879   | chr5 | 72,890,735 | 90  | 424 | 408 | 90  | 393 | 449 | 1.1   | 2.00E-01 | 6.99E-01 |  |  |
| rs347236   | chr5 | 72,898,045 | 408 | 419 | 90  | 448 | 388 | 90  | 0.912 | 2.10E-01 | 6.78E-01 |  |  |
| rs1220634  | chr5 | 72,904,302 | 516 | 357 | 49  | 486 | 378 | 68  | 1.16  | 4.90E-02 | 1.31E+00 |  |  |
| rs343120   | chr5 | 72,911,791 | 59  | 306 | 557 | 64  | 346 | 522 | 0.876 | 9.10E-02 | 1.04E+00 |  |  |
| rs13170849 | chr5 | 72,917,884 | 169 | 445 | 308 | 162 | 449 | 321 | 1.04  | 5.60E-01 | 2.52E-01 |  |  |
| rs2249074  | chr5 | 72,926,029 | 465 | 389 | 68  | 504 | 353 | 75  | 0.929 | 3.30E-01 | 4.81E-01 |  |  |

|            |      |            |     |     |     |     |     |     |       |          |          |  |  |
|------------|------|------------|-----|-----|-----|-----|-----|-----|-------|----------|----------|--|--|
| rs980631   | chr5 | 72,927,514 | 257 | 453 | 199 | 285 | 442 | 198 | 0.941 | 3.80E-01 | 4.20E-01 |  |  |
| rs16870631 | chr5 | 72,929,457 | 2   | 68  | 846 | 1   | 70  | 850 | 1.01  | 9.60E-01 | 1.77E-02 |  |  |
| rs17633441 | chr5 | 72,964,003 | 273 | 467 | 182 | 302 | 447 | 183 | 0.943 | 3.90E-01 | 4.09E-01 |  |  |
| rs6890730  | chr5 | 72,968,811 | 848 | 73  | 1   | 853 | 79  | 0   | 1.04  | 8.60E-01 | 6.55E-02 |  |  |
| rs2464432  | chr5 | 72,970,310 | 67  | 378 | 475 | 73  | 394 | 465 | 0.945 | 4.60E-01 | 3.37E-01 |  |  |
| rs13178946 | chr5 | 72,995,212 | 207 | 474 | 239 | 207 | 456 | 268 | 1.06  | 3.70E-01 | 4.32E-01 |  |  |
| rs10805881 | chr5 | 72,999,704 | 470 | 376 | 76  | 473 | 382 | 77  | 1.01  | 9.60E-01 | 1.77E-02 |  |  |
| rs4704090  | chr5 | 73,002,834 | 470 | 376 | 76  | 473 | 382 | 77  | 1.01  | 9.60E-01 | 1.77E-02 |  |  |
| rs754374   | chr5 | 73,014,534 | 549 | 323 | 50  | 527 | 355 | 50  | 1.08  | 3.10E-01 | 5.09E-01 |  |  |
| rs750345   | chr5 | 73,015,009 | 275 | 467 | 180 | 304 | 456 | 171 | 0.922 | 2.30E-01 | 6.38E-01 |  |  |
| rs17552288 | chr5 | 73,021,756 | 5   | 133 | 784 | 7   | 132 | 793 | 0.989 | 9.80E-01 | 8.77E-03 |  |  |
| rs6868499  | chr5 | 73,025,228 | 859 | 62  | 1   | 858 | 74  | 0   | 1.15  | 4.70E-01 | 3.28E-01 |  |  |
| rs16870743 | chr5 | 73,052,566 | 501 | 355 | 66  | 473 | 388 | 71  | 1.11  | 1.80E-01 | 7.45E-01 |  |  |
| rs7703182  | chr5 | 73,058,823 | 504 | 355 | 63  | 479 | 386 | 67  | 1.1   | 2.30E-01 | 6.38E-01 |  |  |
| rs17664695 | chr5 | 73,066,698 | 852 | 66  | 3   | 851 | 76  | 1   | 1.08  | 7.10E-01 | 1.49E-01 |  |  |
| rs11746513 | chr5 | 73,072,829 | 454 | 376 | 91  | 421 | 420 | 89  | 1.09  | 2.40E-01 | 6.20E-01 |  |  |
| rs952995   | chr5 | 73,077,540 | 53  | 310 | 559 | 43  | 354 | 535 | 0.943 | 4.70E-01 | 3.28E-01 |  |  |
| rs905159   | chr5 | 73,082,471 | 78  | 364 | 480 | 81  | 424 | 427 | 0.857 | 3.40E-02 | 1.47E+00 |  |  |
| rs10515162 | chr5 | 73,090,012 | 776 | 139 | 7   | 783 | 144 | 5   | 0.995 | 9.80E-01 | 8.77E-03 |  |  |
| rs10515163 | chr5 | 73,091,337 | 478 | 364 | 79  | 427 | 422 | 82  | 1.16  | 4.10E-02 | 1.39E+00 |  |  |
| rs6875883  | chr5 | 73,095,704 | 921 | 1   | 0   | 932 | 0   | 0   | 0     | 5.00E-01 | 3.01E-01 |  |  |
| rs16870823 | chr5 | 73,096,410 | 865 | 57  | 0   | 865 | 67  | 0   | 1.17  | 4.50E-01 | 3.47E-01 |  |  |
| rs10062885 | chr5 | 73,104,644 | 545 | 315 | 62  | 507 | 359 | 65  | 1.14  | 9.20E-02 | 1.04E+00 |  |  |
| rs7712515  | chr5 | 73,104,765 | 495 | 353 | 74  | 467 | 401 | 64  | 1.06  | 4.30E-01 | 3.67E-01 |  |  |
| rs10065074 | chr5 | 73,105,788 | 797 | 121 | 4   | 777 | 148 | 7   | 1.27  | 6.30E-02 | 1.20E+00 |  |  |
| rs7714670  | chr5 | 73,108,110 | 270 | 449 | 203 | 243 | 499 | 190 | 1.03  | 6.50E-01 | 1.87E-01 |  |  |
| rs11960055 | chr5 | 73,108,956 | 2   | 95  | 825 | 3   | 120 | 809 | 0.783 | 8.80E-02 | 1.06E+00 |  |  |
| rs6453022  | chr5 | 73,112,267 | 231 | 457 | 234 | 222 | 506 | 204 | 0.956 | 5.10E-01 | 2.92E-01 |  |  |
| rs4597943  | chr5 | 73,123,824 | 219 | 456 | 247 | 212 | 485 | 235 | 0.989 | 8.90E-01 | 5.06E-02 |  |  |
| rs12653477 | chr5 | 73,125,845 | 248 | 451 | 223 | 245 | 477 | 210 | 0.979 | 7.80E-01 | 1.08E-01 |  |  |
| rs2973548  | chr5 | 73,126,984 | 223 | 451 | 248 | 210 | 477 | 245 | 1.02  | 7.80E-01 | 1.08E-01 |  |  |
| rs6883409  | chr5 | 73,128,025 | 850 | 69  | 3   | 842 | 87  | 3   | 1.24  | 2.00E-01 | 6.99E-01 |  |  |
| rs716707   | chr5 | 73,133,625 | 4   | 61  | 857 | 2   | 59  | 871 | 1.11  | 6.10E-01 | 2.15E-01 |  |  |
| rs2931417  | chr5 | 73,140,466 | 279 | 457 | 186 | 301 | 455 | 176 | 0.935 | 3.20E-01 | 4.95E-01 |  |  |
| rs1009200  | chr5 | 73,141,031 | 160 | 440 | 321 | 154 | 444 | 334 | 1.04  | 5.90E-01 | 2.29E-01 |  |  |
| rs2973540  | chr5 | 73,144,309 | 347 | 415 | 160 | 346 | 443 | 143 | 0.969 | 6.60E-01 | 1.80E-01 |  |  |
| rs4703613  | chr5 | 73,144,329 | 44  | 310 | 568 | 48  | 317 | 567 | 0.967 | 7.00E-01 | 1.55E-01 |  |  |
| rs6868665  | chr5 | 73,148,104 | 123 | 401 | 398 | 109 | 428 | 395 | 1.02  | 8.10E-01 | 9.15E-02 |  |  |
| rs16870904 | chr5 | 73,149,406 | 582 | 293 | 46  | 601 | 292 | 38  | 0.932 | 4.10E-01 | 3.87E-01 |  |  |
| rs1038559  | chr5 | 73,149,488 | 88  | 353 | 481 | 86  | 374 | 472 | 0.971 | 7.10E-01 | 1.49E-01 |  |  |
| rs7705309  | chr5 | 73,150,757 | 155 | 405 | 348 | 138 | 439 | 336 | 1.01  | 9.20E-01 | 3.62E-02 |  |  |
| rs4704098  | chr5 | 73,151,031 | 13  | 192 | 717 | 12  | 217 | 703 | 0.903 | 3.30E-01 | 4.81E-01 |  |  |
| rs11949468 | chr5 | 73,151,683 | 15  | 202 | 703 | 16  | 203 | 713 | 1     | 9.60E-01 | 1.77E-02 |  |  |
| rs2931431  | chr5 | 73,160,902 | 485 | 358 | 79  | 475 | 385 | 71  | 1.02  | 8.60E-01 | 6.55E-02 |  |  |
| rs10515164 | chr5 | 73,164,783 | 781 | 131 | 9   | 803 | 124 | 5   | 0.88  | 3.30E-01 | 4.81E-01 |  |  |
| rs2973575  | chr5 | 73,170,750 | 351 | 416 | 155 | 345 | 448 | 139 | 0.982 | 8.20E-01 | 8.62E-02 |  |  |
| rs10040601 | chr5 | 73,171,241 | 309 | 424 | 189 | 308 | 453 | 171 | 0.966 | 6.30E-01 | 2.01E-01 |  |  |
| rs16870944 | chr5 | 73,178,862 | 802 | 110 | 6   | 813 | 113 | 4   | 0.978 | 9.20E-01 | 3.62E-02 |  |  |
| rs2931443  | chr5 | 73,180,057 | 212 | 456 | 253 | 214 | 469 | 247 | 0.982 | 8.10E-01 | 9.15E-02 |  |  |
| rs2973567  | chr5 | 73,181,782 | 212 | 459 | 251 | 216 | 469 | 246 | 0.98  | 7.80E-01 | 1.08E-01 |  |  |
| rs2973566  | chr5 | 73,184,237 | 93  | 372 | 437 | 84  | 367 | 444 | 1.05  | 5.20E-01 | 2.84E-01 |  |  |
| rs17553316 | chr5 | 73,184,872 | 798 | 118 | 6   | 809 | 119 | 4   | 0.964 | 8.30E-01 | 8.09E-02 |  |  |
| rs17732825 | chr5 | 73,184,921 | 6   | 115 | 801 | 4   | 115 | 813 | 1.05  | 7.80E-01 | 1.08E-01 |  |  |
| rs16870977 | chr5 | 73,185,069 | 21  | 210 | 682 | 15  | 220 | 692 | 1.03  | 8.20E-01 | 8.62E-02 |  |  |
| rs2973564  | chr5 | 73,186,789 | 438 | 376 | 93  | 455 | 381 | 87  | 0.958 | 5.70E-01 | 2.44E-01 |  |  |
| rs2973563  | chr5 | 73,189,510 | 198 | 435 | 288 | 183 | 479 | 270 | 0.991 | 9.20E-01 | 3.62E-02 |  |  |
| rs2931434  | chr5 | 73,194,854 | 113 | 410 | 399 | 98  | 413 | 421 | 1.08  | 2.60E-01 | 5.85E-01 |  |  |
| rs6869486  | chr5 | 73,195,357 | 598 | 285 | 39  | 577 | 312 | 43  | 1.11  | 2.20E-01 | 6.58E-01 |  |  |
| rs7720220  | chr5 | 73,197,110 | 762 | 150 | 10  | 740 | 183 | 9   | 1.19  | 1.30E-01 | 8.86E-01 |  |  |
| rs2973558  | chr5 | 73,199,721 | 113 | 410 | 399 | 98  | 414 | 420 | 1.08  | 2.70E-01 | 5.69E-01 |  |  |
| rs2931418  | chr5 | 73,200,644 | 399 | 407 | 116 | 420 | 414 | 98  | 0.917 | 2.30E-01 | 6.38E-01 |  |  |
| rs2973556  | chr5 | 73,201,136 | 292 | 456 | 174 | 293 | 470 | 169 | 0.99  | 9.00E-01 | 4.58E-02 |  |  |
| rs1352200  | chr5 | 73,203,090 | 25  | 228 | 669 | 16  | 228 | 688 | 1.1   | 3.50E-01 | 4.56E-01 |  |  |
| rs2973550  | chr5 | 73,204,335 | 317 | 441 | 159 | 294 | 482 | 151 | 1.04  | 6.00E-01 | 2.22E-01 |  |  |
| rs3749645  | chr5 | 73,215,428 | 16  | 169 | 733 | 12  | 215 | 702 | 0.833 | 8.10E-02 | 1.09E+00 |  |  |
| rs7732677  | chr5 | 73,217,006 | 810 | 105 | 2   | 832 | 96  | 3   | 0.917 | 5.90E-01 | 2.29E-01 |  |  |
| rs729272   | chr5 | 73,221,260 | 604 | 276 | 42  | 578 | 315 | 39  | 1.1   | 2.50E-01 | 6.02E-01 |  |  |
| rs2973529  | chr5 | 73,224,901 | 140 | 439 | 343 | 116 | 445 | 371 | 1.12  | 1.00E-01 | 1.00E+00 |  |  |
| rs3749642  | chr5 | 73,232,396 | 148 | 471 | 303 | 164 | 459 | 309 | 0.975 | 7.20E-01 | 1.43E-01 |  |  |
| rs3749640  | chr5 | 73,232,566 | 101 | 404 | 417 | 87  | 403 | 442 | 1.09  | 2.30E-01 | 6.38E-01 |  |  |

|            |      |            |     |     |     |     |     |     |       |          |          |  |  |
|------------|------|------------|-----|-----|-----|-----|-----|-----|-------|----------|----------|--|--|
| rs283622   | chr5 | 73,234,120 | 201 | 467 | 245 | 216 | 459 | 255 | 0.988 | 8.80E-01 | 5.55E-02 |  |  |
| rs283623   | chr5 | 73,234,405 | 287 | 464 | 169 | 297 | 463 | 172 | 0.988 | 8.80E-01 | 5.55E-02 |  |  |
| rs283624   | chr5 | 73,234,657 | 237 | 476 | 208 | 251 | 472 | 208 | 0.971 | 6.80E-01 | 1.67E-01 |  |  |
| rs283626   | chr5 | 73,237,008 | 199 | 458 | 265 | 196 | 475 | 261 | 0.996 | 9.80E-01 | 8.77E-03 |  |  |
| rs2434215  | chr5 | 73,237,747 | 27  | 257 | 638 | 34  | 307 | 591 | 0.806 | 1.20E-02 | 1.92E+00 |  |  |
| rs2931425  | chr5 | 73,238,236 | 216 | 454 | 252 | 202 | 478 | 252 | 1.03  | 6.80E-01 | 1.67E-01 |  |  |
| rs283619   | chr5 | 73,239,166 | 389 | 405 | 128 | 375 | 440 | 117 | 1.01  | 8.70E-01 | 6.05E-02 |  |  |
| rs10515168 | chr5 | 73,242,423 | 5   | 163 | 754 | 4   | 154 | 774 | 1.09  | 5.00E-01 | 3.01E-01 |  |  |
| rs2931426  | chr5 | 73,245,007 | 260 | 454 | 208 | 295 | 453 | 183 | 0.879 | 5.50E-02 | 1.26E+00 |  |  |
| rs392344   | chr5 | 73,245,048 | 453 | 365 | 104 | 442 | 396 | 94  | 1.01  | 8.90E-01 | 5.06E-02 |  |  |
| rs411585   | chr5 | 73,247,072 | 50  | 337 | 532 | 49  | 364 | 517 | 0.944 | 4.70E-01 | 3.28E-01 |  |  |
| rs434008   | chr5 | 73,250,537 | 16  | 191 | 715 | 7   | 188 | 737 | 1.13  | 2.50E-01 | 6.02E-01 |  |  |
| rs425911   | chr5 | 73,250,793 | 16  | 189 | 715 | 7   | 186 | 736 | 1.13  | 2.50E-01 | 6.02E-01 |  |  |
| rs16871035 | chr5 | 73,254,617 | 1   | 71  | 848 | 1   | 80  | 851 | 0.898 | 5.70E-01 | 2.44E-01 |  |  |
| rs2973534  | chr5 | 73,260,445 | 782 | 131 | 9   | 760 | 167 | 5   | 1.19  | 1.40E-01 | 8.54E-01 |  |  |
| rs283628   | chr5 | 73,261,646 | 124 | 432 | 366 | 114 | 457 | 361 | 1.01  | 9.60E-01 | 1.77E-02 |  |  |
| rs1684850  | chr5 | 73,265,862 | 33  | 317 | 572 | 31  | 283 | 618 | 1.15  | 9.10E-02 | 1.04E+00 |  |  |
| rs1650439  | chr5 | 73,266,817 | 352 | 432 | 130 | 345 | 449 | 131 | 1.02  | 7.40E-01 | 1.31E-01 |  |  |
| rs283592   | chr5 | 73,276,726 | 297 | 471 | 154 | 294 | 481 | 157 | 1.02  | 8.30E-01 | 8.09E-02 |  |  |
| rs283596   | chr5 | 73,278,467 | 296 | 471 | 154 | 293 | 482 | 157 | 1.02  | 8.30E-01 | 8.09E-02 |  |  |
| rs283608   | chr5 | 73,283,089 | 304 | 466 | 152 | 296 | 485 | 151 | 1.02  | 8.00E-01 | 9.69E-02 |  |  |
| rs283612   | chr5 | 73,286,248 | 349 | 438 | 135 | 334 | 465 | 133 | 1.04  | 6.30E-01 | 2.01E-01 |  |  |
| rs2450438  | chr5 | 73,290,296 | 629 | 263 | 30  | 606 | 291 | 35  | 1.13  | 1.60E-01 | 7.96E-01 |  |  |
| rs17733544 | chr5 | 73,293,966 | 661 | 237 | 24  | 649 | 256 | 27  | 1.09  | 3.50E-01 | 4.56E-01 |  |  |
| rs388272   | chr5 | 73,294,996 | 174 | 464 | 282 | 182 | 491 | 259 | 0.932 | 3.00E-01 | 5.23E-01 |  |  |
| rs17733586 | chr5 | 73,295,365 | 1   | 74  | 847 | 1   | 84  | 847 | 0.889 | 5.10E-01 | 2.92E-01 |  |  |
| rs416286   | chr5 | 73,297,869 | 487 | 362 | 73  | 474 | 396 | 62  | 1.02  | 8.40E-01 | 7.57E-02 |  |  |
| rs453036   | chr5 | 73,299,713 | 143 | 437 | 342 | 143 | 464 | 325 | 0.958 | 5.40E-01 | 2.68E-01 |  |  |
| rs511623   | chr5 | 73,300,426 | 143 | 436 | 343 | 143 | 464 | 325 | 0.956 | 5.20E-01 | 2.84E-01 |  |  |
| rs410914   | chr5 | 73,301,141 | 142 | 435 | 345 | 142 | 463 | 327 | 0.956 | 5.20E-01 | 2.84E-01 |  |  |
| rs671716   | chr5 | 73,302,245 | 104 | 408 | 410 | 92  | 452 | 388 | 0.969 | 6.70E-01 | 1.74E-01 |  |  |
| rs282372   | chr5 | 73,303,018 | 170 | 468 | 283 | 184 | 478 | 270 | 0.94  | 3.70E-01 | 4.32E-01 |  |  |
| rs9986187  | chr5 | 73,303,123 | 13  | 165 | 744 | 13  | 177 | 735 | 0.937 | 5.80E-01 | 2.37E-01 |  |  |
| rs378872   | chr5 | 73,303,585 | 286 | 463 | 170 | 270 | 479 | 183 | 1.07  | 3.30E-01 | 4.81E-01 |  |  |
| rs414915   | chr5 | 73,304,421 | 68  | 328 | 526 | 67  | 361 | 504 | 0.93  | 3.50E-01 | 4.56E-01 |  |  |
| rs10038733 | chr5 | 73,307,698 | 13  | 165 | 744 | 14  | 178 | 740 | 0.93  | 5.30E-01 | 2.76E-01 |  |  |
| rs282376   | chr5 | 73,308,860 | 95  | 393 | 429 | 90  | 429 | 409 | 0.954 | 5.30E-01 | 2.76E-01 |  |  |
| rs403936   | chr5 | 73,309,151 | 51  | 340 | 531 | 60  | 364 | 508 | 0.899 | 1.70E-01 | 7.70E-01 |  |  |
| rs282377   | chr5 | 73,309,406 | 5   | 75  | 842 | 2   | 65  | 865 | 1.26  | 1.90E-01 | 7.21E-01 |  |  |
| rs384834   | chr5 | 73,309,452 | 161 | 469 | 292 | 178 | 478 | 276 | 0.928 | 2.70E-01 | 5.69E-01 |  |  |
| rs6894385  | chr5 | 73,312,659 | 617 | 276 | 29  | 634 | 273 | 25  | 0.948 | 5.60E-01 | 2.52E-01 |  |  |
| rs282381   | chr5 | 73,313,129 | 228 | 480 | 212 | 263 | 468 | 200 | 0.904 | 1.30E-01 | 8.86E-01 |  |  |
| rs2973536  | chr5 | 73,316,114 | 223 | 483 | 215 | 214 | 480 | 238 | 1.07  | 3.10E-01 | 5.09E-01 |  |  |
| rs255597   | chr5 | 73,318,007 | 50  | 338 | 534 | 59  | 364 | 509 | 0.893 | 1.50E-01 | 8.24E-01 |  |  |
| rs1904170  | chr5 | 73,319,448 | 163 | 466 | 288 | 180 | 475 | 274 | 0.931 | 3.00E-01 | 5.23E-01 |  |  |
| rs9293613  | chr5 | 73,322,054 | 920 | 2   | 0   | 932 | 0   | 0   | 0     | 2.50E-01 | 6.02E-01 |  |  |
| rs10058557 | chr5 | 73,322,836 | 150 | 471 | 301 | 161 | 480 | 291 | 0.951 | 4.70E-01 | 3.28E-01 |  |  |
| rs255592   | chr5 | 73,323,167 | 473 | 378 | 71  | 481 | 377 | 74  | 0.998 | 9.90E-01 | 4.36E-03 |  |  |
| rs17666430 | chr5 | 73,331,083 | 783 | 131 | 8   | 777 | 145 | 10  | 1.12  | 3.60E-01 | 4.44E-01 |  |  |
| rs1002830  | chr5 | 73,332,988 | 588 | 279 | 27  | 606 | 270 | 25  | 0.943 | 5.30E-01 | 2.76E-01 |  |  |
| rs194274   | chr5 | 73,344,099 | 17  | 214 | 691 | 16  | 245 | 671 | 0.89  | 2.40E-01 | 6.20E-01 |  |  |
| rs187637   | chr5 | 73,345,060 | 301 | 460 | 161 | 282 | 487 | 163 | 1.05  | 4.80E-01 | 3.19E-01 |  |  |
| rs10078294 | chr5 | 73,349,730 | 293 | 446 | 180 | 276 | 480 | 174 | 1.03  | 7.10E-01 | 1.49E-01 |  |  |
| rs3101727  | chr5 | 73,364,958 | 303 | 443 | 176 | 320 | 445 | 166 | 0.945 | 4.10E-01 | 3.87E-01 |  |  |
| rs410390   | chr5 | 73,365,915 | 102 | 410 | 409 | 106 | 383 | 443 | 1.07  | 3.80E-01 | 4.20E-01 |  |  |
| rs17636051 | chr5 | 73,367,510 | 0   | 62  | 860 | 1   | 68  | 863 | 0.892 | 5.80E-01 | 2.37E-01 |  |  |
| rs285600   | chr5 | 73,367,540 | 888 | 34  | 0   | 891 | 41  | 0   | 1.2   | 5.10E-01 | 2.92E-01 |  |  |
| rs285599   | chr5 | 73,374,870 | 112 | 405 | 405 | 97  | 386 | 449 | 1.15  | 5.60E-02 | 1.25E+00 |  |  |
| rs285598   | chr5 | 73,375,361 | 112 | 405 | 405 | 97  | 386 | 449 | 1.15  | 5.60E-02 | 1.25E+00 |  |  |
| rs255585   | chr5 | 73,379,702 | 380 | 416 | 126 | 415 | 407 | 110 | 0.892 | 1.10E-01 | 9.59E-01 |  |  |
| rs16871304 | chr5 | 73,387,781 | 25  | 244 | 653 | 19  | 247 | 666 | 1.05  | 6.10E-01 | 2.15E-01 |  |  |
| rs6861281  | chr5 | 73,389,024 | 803 | 114 | 3   | 820 | 109 | 3   | 0.942 | 7.10E-01 | 1.49E-01 |  |  |
| rs12522885 | chr5 | 73,391,892 | 24  | 245 | 653 | 19  | 246 | 666 | 1.05  | 6.20E-01 | 2.08E-01 |  |  |
| rs286645   | chr5 | 73,402,451 | 413 | 411 | 98  | 444 | 386 | 101 | 0.941 | 4.00E-01 | 3.98E-01 |  |  |
| rs286641   | chr5 | 73,403,994 | 532 | 333 | 56  | 489 | 371 | 72  | 1.2   | 1.80E-02 | 1.74E+00 |  |  |
| rs286636   | chr5 | 73,406,589 | 541 | 324 | 51  | 498 | 361 | 69  | 1.21  | 1.20E-02 | 1.92E+00 |  |  |
| rs152044   | chr5 | 73,407,434 | 346 | 457 | 119 | 389 | 416 | 127 | 0.928 | 2.90E-01 | 5.38E-01 |  |  |
| rs173483   | chr5 | 73,408,092 | 346 | 456 | 120 | 386 | 420 | 126 | 0.93  | 3.00E-01 | 5.23E-01 |  |  |
| rs1818123  | chr5 | 73,411,975 | 159 | 474 | 289 | 163 | 455 | 314 | 1.04  | 5.40E-01 | 2.68E-01 |  |  |
| rs768262   | chr5 | 73,415,087 | 403 | 421 | 93  | 435 | 381 | 114 | 0.984 | 8.50E-01 | 7.06E-02 |  |  |



|            |      |            |     |     |     |     |     |     |       |          |          |  |  |
|------------|------|------------|-----|-----|-----|-----|-----|-----|-------|----------|----------|--|--|
| rs1995385  | chr5 | 73,415,681 | 559 | 324 | 38  | 564 | 312 | 56  | 1.06  | 4.70E-01 | 3.28E-01 |  |  |
| rs718164   | chr5 | 73,417,137 | 559 | 325 | 38  | 565 | 311 | 56  | 1.06  | 5.10E-01 | 2.92E-01 |  |  |
| rs7735553  | chr5 | 73,418,739 | 365 | 426 | 131 | 405 | 391 | 136 | 0.928 | 2.90E-01 | 5.38E-01 |  |  |
| rs17636389 | chr5 | 73,418,871 | 9   | 150 | 763 | 9   | 149 | 774 | 1.02  | 9.20E-01 | 3.62E-02 |  |  |
| rs4703619  | chr5 | 73,420,482 | 147 | 462 | 313 | 182 | 413 | 336 | 0.97  | 6.80E-01 | 1.67E-01 |  |  |
| rs2840108  | chr5 | 73,428,125 | 213 | 482 | 227 | 243 | 430 | 258 | 1     | 1.00E+00 | 0.00E+00 |  |  |
| rs4704108  | chr5 | 73,428,422 | 79  | 379 | 464 | 84  | 354 | 494 | 1.06  | 4.70E-01 | 3.28E-01 |  |  |
| rs10063644 | chr5 | 73,430,875 | 145 | 456 | 321 | 178 | 412 | 341 | 0.968 | 6.50E-01 | 1.87E-01 |  |  |
| rs17555606 | chr5 | 73,435,599 | 9   | 144 | 768 | 7   | 136 | 787 | 1.1   | 4.60E-01 | 3.37E-01 |  |  |
| rs288855   | chr5 | 73,438,971 | 493 | 373 | 56  | 504 | 358 | 70  | 1.02  | 8.00E-01 | 9.69E-02 |  |  |
| rs464577   | chr5 | 73,447,915 | 494 | 372 | 56  | 503 | 358 | 70  | 1.03  | 7.60E-01 | 1.19E-01 |  |  |
| rs10064733 | chr5 | 73,455,822 | 93  | 421 | 408 | 113 | 374 | 445 | 1.03  | 6.60E-01 | 1.80E-01 |  |  |
| rs10072489 | chr5 | 73,455,899 | 406 | 422 | 94  | 446 | 374 | 112 | 0.956 | 5.40E-01 | 2.68E-01 |  |  |
| rs169628   | chr5 | 73,459,050 | 143 | 462 | 317 | 176 | 413 | 343 | 0.98  | 7.90E-01 | 1.02E-01 |  |  |
| rs288864   | chr5 | 73,463,799 | 188 | 472 | 258 | 238 | 436 | 255 | 0.89  | 8.40E-02 | 1.08E+00 |  |  |
| rs158580   | chr5 | 73,470,256 | 72  | 378 | 472 | 72  | 363 | 497 | 1.06  | 4.70E-01 | 3.28E-01 |  |  |
| rs2120729  | chr5 | 73,478,194 | 78  | 404 | 438 | 102 | 365 | 464 | 0.994 | 9.60E-01 | 1.77E-02 |  |  |
| rs191899   | chr5 | 73,481,573 | 347 | 436 | 139 | 361 | 429 | 142 | 0.98  | 8.00E-01 | 9.69E-02 |  |  |
| rs10515174 | chr5 | 73,483,134 | 842 | 78  | 1   | 862 | 68  | 2   | 0.885 | 5.10E-01 | 2.92E-01 |  |  |
| rs12188714 | chr5 | 73,486,196 | 605 | 282 | 35  | 634 | 256 | 42  | 0.946 | 5.30E-01 | 2.76E-01 |  |  |
| rs12188320 | chr5 | 73,488,183 | 113 | 412 | 396 | 126 | 407 | 399 | 0.969 | 6.70E-01 | 1.74E-01 |  |  |
| rs17735123 | chr5 | 73,488,223 | 658 | 240 | 24  | 640 | 262 | 30  | 1.13  | 1.90E-01 | 7.21E-01 |  |  |
| rs290726   | chr5 | 73,495,641 | 80  | 399 | 443 | 87  | 380 | 465 | 1.03  | 7.20E-01 | 1.43E-01 |  |  |
| rs288837   | chr5 | 73,499,743 | 59  | 376 | 487 | 76  | 341 | 515 | 1.02  | 8.40E-01 | 7.57E-02 |  |  |
| rs1444565  | chr5 | 73,506,496 | 379 | 434 | 108 | 399 | 418 | 115 | 0.977 | 7.60E-01 | 1.19E-01 |  |  |
| rs158807   | chr5 | 73,510,358 | 77  | 408 | 436 | 85  | 373 | 473 | 1.07  | 3.90E-01 | 4.09E-01 |  |  |
| rs11745556 | chr5 | 73,512,572 | 5   | 111 | 806 | 4   | 116 | 812 | 0.985 | 9.60E-01 | 1.77E-02 |  |  |
| rs4704111  | chr5 | 73,518,971 | 256 | 468 | 198 | 298 | 444 | 190 | 0.899 | 1.10E-01 | 9.59E-01 |  |  |
| rs158805   | chr5 | 73,522,406 | 476 | 384 | 62  | 511 | 353 | 68  | 0.935 | 3.90E-01 | 4.09E-01 |  |  |
| rs716212   | chr5 | 73,523,708 | 6   | 123 | 793 | 6   | 118 | 808 | 1.05  | 7.30E-01 | 1.37E-01 |  |  |
| rs13169946 | chr5 | 73,524,948 | 189 | 466 | 267 | 226 | 459 | 247 | 0.883 | 6.30E-02 | 1.20E+00 |  |  |
| rs1444560  | chr5 | 73,526,320 | 275 | 463 | 174 | 254 | 456 | 219 | 1.16  | 2.90E-02 | 1.54E+00 |  |  |
| rs158815   | chr5 | 73,533,753 | 547 | 323 | 52  | 574 | 312 | 46  | 0.918 | 3.00E-01 | 5.23E-01 |  |  |
| rs10061061 | chr5 | 73,538,940 | 177 | 454 | 287 | 206 | 473 | 249 | 0.862 | 2.70E-02 | 1.57E+00 |  |  |
| rs7719793  | chr5 | 73,541,155 | 820 | 98  | 3   | 835 | 96  | 0   | 0.908 | 5.60E-01 | 2.52E-01 |  |  |
| rs158810   | chr5 | 73,541,867 | 566 | 320 | 35  | 600 | 299 | 33  | 0.907 | 2.50E-01 | 6.02E-01 |  |  |
| rs292203   | chr5 | 73,542,540 | 79  | 401 | 442 | 75  | 381 | 476 | 1.09  | 2.40E-01 | 6.20E-01 |  |  |
| rs167111   | chr5 | 73,542,948 | 150 | 467 | 305 | 152 | 472 | 308 | 0.998 | 9.90E-01 | 4.36E-03 |  |  |
| rs12519078 | chr5 | 73,545,252 | 62  | 348 | 511 | 62  | 354 | 516 | 0.999 | 9.80E-01 | 8.77E-03 |  |  |
| rs209770   | chr5 | 73,545,509 | 460 | 374 | 88  | 463 | 392 | 77  | 0.975 | 7.50E-01 | 1.25E-01 |  |  |
| rs2004500  | chr5 | 73,546,408 | 188 | 437 | 297 | 208 | 443 | 281 | 0.923 | 2.40E-01 | 6.20E-01 |  |  |
| rs680500   | chr5 | 73,547,443 | 486 | 368 | 68  | 514 | 348 | 70  | 0.943 | 4.50E-01 | 3.47E-01 |  |  |
| rs7728448  | chr5 | 73,552,681 | 511 | 347 | 64  | 515 | 353 | 64  | 1     | 1.00E+00 | 0.00E+00 |  |  |
| rs6453045  | chr5 | 73,555,480 | 155 | 427 | 339 | 142 | 420 | 368 | 1.1   | 1.90E-01 | 7.21E-01 |  |  |
| rs685295   | chr5 | 73,556,393 | 335 | 417 | 170 | 337 | 434 | 161 | 0.98  | 7.90E-01 | 1.02E-01 |  |  |
| rs6863889  | chr5 | 73,560,159 | 800 | 120 | 2   | 820 | 106 | 6   | 0.937 | 6.80E-01 | 1.67E-01 |  |  |
| rs4479825  | chr5 | 73,563,084 | 6   | 173 | 743 | 7   | 169 | 756 | 1.02  | 8.70E-01 | 6.05E-02 |  |  |
| rs10515165 | chr5 | 73,563,580 | 196 | 483 | 243 | 226 | 474 | 232 | 0.915 | 1.90E-01 | 7.21E-01 |  |  |
| rs1824495  | chr5 | 73,572,506 | 387 | 400 | 135 | 393 | 438 | 101 | 0.916 | 2.20E-01 | 6.58E-01 |  |  |
| rs627834   | chr5 | 73,575,492 | 686 | 215 | 21  | 694 | 212 | 26  | 1.02  | 8.80E-01 | 5.55E-02 |  |  |
| rs292213   | chr5 | 73,579,347 | 46  | 367 | 509 | 74  | 364 | 494 | 0.875 | 8.10E-02 | 1.09E+00 |  |  |
| rs654937   | chr5 | 73,582,825 | 76  | 368 | 478 | 82  | 391 | 459 | 0.926 | 3.10E-01 | 5.09E-01 |  |  |
| rs7723844  | chr5 | 73,583,800 | 8   | 170 | 743 | 11  | 181 | 740 | 0.919 | 4.60E-01 | 3.37E-01 |  |  |
| rs2962622  | chr5 | 73,584,027 | 60  | 369 | 493 | 74  | 384 | 474 | 0.904 | 1.80E-01 | 7.45E-01 |  |  |
| rs292209   | chr5 | 73,590,100 | 482 | 366 | 74  | 457 | 383 | 92  | 1.13  | 9.50E-02 | 1.02E+00 |  |  |
| rs11740435 | chr5 | 73,591,760 | 799 | 119 | 4   | 779 | 150 | 3   | 1.23  | 1.00E-01 | 1.00E+00 |  |  |
| rs7728483  | chr5 | 73,592,316 | 16  | 222 | 683 | 20  | 229 | 683 | 0.948 | 6.10E-01 | 2.15E-01 |  |  |
| rs1460806  | chr5 | 73,593,425 | 211 | 442 | 269 | 223 | 473 | 235 | 0.905 | 1.40E-01 | 8.54E-01 |  |  |
| rs2126039  | chr5 | 73,600,305 | 29  | 259 | 634 | 28  | 265 | 639 | 0.998 | 9.80E-01 | 8.77E-03 |  |  |
| rs17643294 | chr5 | 73,601,431 | 515 | 344 | 63  | 506 | 361 | 65  | 1.05  | 5.80E-01 | 2.37E-01 |  |  |
| rs569120   | chr5 | 73,605,019 | 219 | 463 | 240 | 232 | 458 | 242 | 0.976 | 7.40E-01 | 1.31E-01 |  |  |
| rs1870658  | chr5 | 73,612,235 | 777 | 140 | 5   | 782 | 143 | 7   | 1.04  | 8.00E-01 | 9.69E-02 |  |  |
| rs471405   | chr5 | 73,613,440 | 5   | 140 | 777 | 7   | 143 | 782 | 0.963 | 8.00E-01 | 9.69E-02 |  |  |
| rs2962624  | chr5 | 73,614,274 | 172 | 459 | 291 | 182 | 426 | 324 | 1.05  | 4.90E-01 | 3.10E-01 |  |  |
| rs10515167 | chr5 | 73,616,240 | 427 | 410 | 85  | 471 | 386 | 75  | 0.88  | 7.90E-02 | 1.10E+00 |  |  |
| rs922202   | chr5 | 73,624,885 | 222 | 483 | 217 | 209 | 481 | 242 | 1.09  | 2.30E-01 | 6.38E-01 |  |  |
| rs16871645 | chr5 | 73,639,570 | 2   | 87  | 831 | 3   | 100 | 826 | 0.86  | 3.40E-01 | 4.69E-01 |  |  |
| rs2872489  | chr5 | 73,645,873 | 122 | 441 | 359 | 132 | 458 | 342 | 0.935 | 3.40E-01 | 4.69E-01 |  |  |
| rs533886   | chr5 | 73,654,548 | 9   | 178 | 735 | 8   | 183 | 741 | 0.995 | 9.90E-01 | 4.36E-03 |  |  |
| rs12521529 | chr5 | 73,654,575 | 355 | 444 | 123 | 343 | 457 | 132 | 1.05  | 4.50E-01 | 3.47E-01 |  |  |

|            |      |            |     |     |     |     |     |     |       |          |          |  |  |
|------------|------|------------|-----|-----|-----|-----|-----|-----|-------|----------|----------|--|--|
| rs2199316  | chr5 | 73,655,326 | 89  | 417 | 416 | 94  | 428 | 410 | 0.965 | 6.40E-01 | 1.94E-01 |  |  |
| rs4704129  | chr5 | 73,655,459 | 245 | 474 | 203 | 234 | 487 | 211 | 1.04  | 5.50E-01 | 2.60E-01 |  |  |
| rs4704133  | chr5 | 73,667,082 | 94  | 419 | 409 | 93  | 431 | 408 | 0.992 | 9.30E-01 | 3.15E-02 |  |  |
| rs4704134  | chr5 | 73,669,592 | 152 | 472 | 298 | 155 | 473 | 304 | 1     | 9.90E-01 | 4.36E-03 |  |  |
| rs376518   | chr5 | 73,689,743 | 8   | 186 | 727 | 12  | 204 | 716 | 0.884 | 2.50E-01 | 6.02E-01 |  |  |
| rs571408   | chr5 | 73,690,403 | 8   | 187 | 727 | 12  | 204 | 716 | 0.888 | 2.70E-01 | 5.69E-01 |  |  |
| rs1873363  | chr5 | 73,692,476 | 749 | 162 | 10  | 762 | 159 | 11  | 0.981 | 9.10E-01 | 4.10E-02 |  |  |
| rs409773   | chr5 | 73,693,516 | 37  | 311 | 574 | 41  | 329 | 562 | 0.933 | 4.10E-01 | 3.87E-01 |  |  |
| rs548734   | chr5 | 73,704,090 | 92  | 415 | 413 | 93  | 419 | 420 | 1     | 9.80E-01 | 8.77E-03 |  |  |
| rs10036629 | chr5 | 73,706,989 | 191 | 445 | 285 | 178 | 471 | 283 | 1.02  | 7.70E-01 | 1.14E-01 |  |  |
| rs10515178 | chr5 | 73,709,913 | 124 | 412 | 386 | 126 | 401 | 405 | 1.03  | 6.50E-01 | 1.87E-01 |  |  |
| rs540104   | chr5 | 73,714,392 | 651 | 238 | 32  | 638 | 269 | 25  | 1.05  | 5.90E-01 | 2.29E-01 |  |  |
| rs452853   | chr5 | 73,715,141 | 32  | 239 | 650 | 26  | 268 | 638 | 0.95  | 5.90E-01 | 2.29E-01 |  |  |
| rs9293625  | chr5 | 73,715,681 | 149 | 411 | 362 | 135 | 428 | 369 | 1.04  | 5.50E-01 | 2.60E-01 |  |  |
| rs7704601  | chr5 | 73,718,020 | 214 | 434 | 268 | 212 | 430 | 281 | 1.03  | 6.50E-01 | 1.87E-01 |  |  |
| rs294986   | chr5 | 73,718,795 | 592 | 289 | 41  | 581 | 304 | 47  | 1.08  | 3.80E-01 | 4.20E-01 |  |  |
| rs17558109 | chr5 | 73,719,123 | 21  | 257 | 630 | 24  | 230 | 651 | 1.09  | 3.90E-01 | 4.09E-01 |  |  |
| rs10454913 | chr5 | 73,720,859 | 286 | 442 | 194 | 293 | 445 | 194 | 0.987 | 8.70E-01 | 6.05E-02 |  |  |
| rs1846971  | chr5 | 73,724,253 | 760 | 157 | 5   | 759 | 165 | 7   | 1.07  | 6.00E-01 | 2.22E-01 |  |  |
| rs10065639 | chr5 | 73,726,105 | 509 | 349 | 64  | 511 | 348 | 73  | 1.03  | 6.90E-01 | 1.61E-01 |  |  |
| rs4704139  | chr5 | 73,729,635 | 632 | 259 | 30  | 630 | 270 | 32  | 1.04  | 6.60E-01 | 1.80E-01 |  |  |
| rs10474415 | chr5 | 73,730,174 | 122 | 416 | 384 | 125 | 417 | 390 | 1     | 9.80E-01 | 8.77E-03 |  |  |
| rs295691   | chr5 | 73,738,066 | 364 | 410 | 148 | 362 | 436 | 134 | 0.978 | 7.70E-01 | 1.14E-01 |  |  |
| rs464581   | chr5 | 73,741,558 | 622 | 276 | 24  | 661 | 245 | 26  | 0.889 | 2.00E-01 | 6.99E-01 |  |  |
| rs413430   | chr5 | 73,746,180 | 761 | 155 | 6   | 752 | 168 | 12  | 1.15  | 2.20E-01 | 6.58E-01 |  |  |
| rs435958   | chr5 | 73,748,965 | 189 | 449 | 283 | 215 | 456 | 261 | 0.899 | 1.20E-01 | 9.21E-01 |  |  |
| rs10515181 | chr5 | 73,751,240 | 11  | 159 | 752 | 14  | 159 | 759 | 0.976 | 8.70E-01 | 6.05E-02 |  |  |
| rs6889605  | chr5 | 73,753,356 | 661 | 233 | 27  | 646 | 255 | 31  | 1.11  | 2.60E-01 | 5.85E-01 |  |  |
| rs6863488  | chr5 | 73,753,401 | 27  | 234 | 661 | 31  | 255 | 645 | 0.902 | 2.70E-01 | 5.69E-01 |  |  |
| rs460738   | chr5 | 73,755,416 | 343 | 410 | 165 | 354 | 427 | 145 | 0.936 | 3.40E-01 | 4.69E-01 |  |  |
| rs417421   | chr5 | 73,757,300 | 638 | 258 | 25  | 627 | 268 | 35  | 1.11  | 2.60E-01 | 5.85E-01 |  |  |
| rs294983   | chr5 | 73,757,965 | 105 | 385 | 432 | 126 | 405 | 401 | 0.875 | 6.00E-02 | 1.22E+00 |  |  |
| rs16871870 | chr5 | 73,778,817 | 711 | 191 | 20  | 728 | 188 | 16  | 0.934 | 5.30E-01 | 2.76E-01 |  |  |
| rs445653   | chr5 | 73,780,322 | 447 | 395 | 80  | 483 | 359 | 90  | 0.945 | 4.50E-01 | 3.47E-01 |  |  |
| rs294971   | chr5 | 73,780,816 | 133 | 395 | 393 | 139 | 431 | 362 | 0.912 | 1.90E-01 | 7.21E-01 |  |  |
| rs296941   | chr5 | 73,782,343 | 619 | 275 | 28  | 643 | 255 | 34  | 0.958 | 6.50E-01 | 1.87E-01 |  |  |
| rs294975   | chr5 | 73,783,037 | 190 | 447 | 285 | 193 | 429 | 310 | 1.05  | 5.10E-01 | 2.92E-01 |  |  |
| rs1873365  | chr5 | 73,785,648 | 869 | 38  | 3   | 869 | 56  | 3   | 1.39  | 1.20E-01 | 9.21E-01 |  |  |
| rs2927624  | chr5 | 73,793,817 | 665 | 234 | 23  | 687 | 226 | 19  | 0.922 | 4.10E-01 | 3.87E-01 |  |  |
| rs17559038 | chr5 | 73,802,706 | 782 | 135 | 4   | 811 | 116 | 4   | 0.848 | 2.20E-01 | 6.58E-01 |  |  |
| rs7703491  | chr5 | 73,803,337 | 644 | 250 | 28  | 677 | 232 | 23  | 0.881 | 1.70E-01 | 7.70E-01 |  |  |
| rs6453059  | chr5 | 73,803,891 | 45  | 365 | 510 | 59  | 340 | 532 | 1.01  | 9.60E-01 | 1.77E-02 |  |  |
| rs6453061  | chr5 | 73,807,422 | 304 | 442 | 176 | 296 | 458 | 176 | 1.02  | 7.90E-01 | 1.02E-01 |  |  |
| rs12153302 | chr5 | 73,813,134 | 30  | 230 | 662 | 16  | 263 | 652 | 0.991 | 9.60E-01 | 1.77E-02 |  |  |
| rs2927632  | chr5 | 73,814,412 | 70  | 359 | 493 | 86  | 357 | 489 | 0.936 | 3.90E-01 | 4.09E-01 |  |  |
| rs2962189  | chr5 | 73,814,530 | 21  | 269 | 632 | 28  | 270 | 634 | 0.957 | 6.50E-01 | 1.87E-01 |  |  |
| rs2927633  | chr5 | 73,816,540 | 168 | 444 | 310 | 189 | 470 | 273 | 0.878 | 5.40E-02 | 1.27E+00 |  |  |
| rs6874566  | chr5 | 73,822,636 | 500 | 351 | 71  | 491 | 361 | 80  | 1.06  | 4.30E-01 | 3.67E-01 |  |  |
| rs1544939  | chr5 | 73,823,034 | 499 | 350 | 72  | 488 | 364 | 80  | 1.07  | 4.00E-01 | 3.98E-01 |  |  |
| rs890995   | chr5 | 73,824,022 | 331 | 455 | 136 | 342 | 455 | 135 | 0.978 | 7.70E-01 | 1.14E-01 |  |  |
| rs298380   | chr5 | 73,829,765 | 522 | 340 | 55  | 528 | 327 | 73  | 1.05  | 5.30E-01 | 2.76E-01 |  |  |
| rs6453065  | chr5 | 73,832,280 | 22  | 283 | 617 | 21  | 247 | 664 | 1.17  | 7.50E-02 | 1.12E+00 |  |  |
| rs11749231 | chr5 | 73,835,839 | 587 | 309 | 26  | 631 | 274 | 27  | 0.877 | 1.30E-01 | 8.86E-01 |  |  |
| rs298372   | chr5 | 73,836,077 | 525 | 342 | 55  | 526 | 332 | 74  | 1.07  | 4.10E-01 | 3.87E-01 |  |  |
| rs17645426 | chr5 | 73,836,374 | 26  | 308 | 588 | 27  | 274 | 631 | 1.14  | 1.40E-01 | 8.54E-01 |  |  |
| rs10053091 | chr5 | 73,839,457 | 728 | 188 | 6   | 712 | 200 | 20  | 1.21  | 6.30E-02 | 1.20E+00 |  |  |
| rs16871933 | chr5 | 73,841,521 | 796 | 119 | 7   | 804 | 125 | 2   | 0.958 | 7.80E-01 | 1.08E-01 |  |  |
| rs16871943 | chr5 | 73,844,502 | 7   | 120 | 795 | 2   | 129 | 800 | 1.02  | 9.30E-01 | 3.15E-02 |  |  |
| rs212925   | chr5 | 73,846,234 | 205 | 463 | 254 | 228 | 442 | 262 | 0.967 | 6.30E-01 | 2.01E-01 |  |  |
| rs11745925 | chr5 | 73,847,006 | 59  | 380 | 483 | 55  | 356 | 520 | 1.11  | 1.80E-01 | 7.45E-01 |  |  |
| rs186139   | chr5 | 73,851,866 | 204 | 464 | 254 | 227 | 440 | 265 | 0.973 | 7.10E-01 | 1.49E-01 |  |  |
| rs298393   | chr5 | 73,856,998 | 205 | 464 | 253 | 229 | 439 | 264 | 0.971 | 6.80E-01 | 1.67E-01 |  |  |
| rs16871987 | chr5 | 73,867,959 | 7   | 143 | 772 | 5   | 152 | 775 | 0.978 | 8.90E-01 | 5.06E-02 |  |  |
| rs1651349  | chr5 | 73,869,708 | 113 | 408 | 401 | 127 | 411 | 394 | 0.945 | 4.30E-01 | 3.67E-01 |  |  |
| rs1510936  | chr5 | 73,869,868 | 507 | 354 | 61  | 515 | 335 | 82  | 1.05  | 5.30E-01 | 2.76E-01 |  |  |
| rs390755   | chr5 | 73,875,573 | 327 | 446 | 149 | 324 | 443 | 165 | 1.05  | 5.10E-01 | 2.92E-01 |  |  |
| rs435624   | chr5 | 73,877,583 | 277 | 462 | 183 | 307 | 445 | 180 | 0.933 | 3.10E-01 | 5.09E-01 |  |  |
| rs13189660 | chr5 | 73,877,692 | 437 | 393 | 92  | 456 | 395 | 81  | 0.936 | 3.70E-01 | 4.32E-01 |  |  |
| rs424946   | chr5 | 73,880,084 | 92  | 393 | 437 | 81  | 395 | 456 | 1.07  | 3.70E-01 | 4.32E-01 |  |  |
| rs2173671  | chr5 | 73,882,800 | 85  | 399 | 438 | 92  | 383 | 457 | 1.02  | 8.00E-01 | 9.69E-02 |  |  |

|            |      |            |     |     |     |     |     |     |       |          |          |  |  |
|------------|------|------------|-----|-----|-----|-----|-----|-----|-------|----------|----------|--|--|
| rs298389   | chr5 | 73,884,748 | 44  | 319 | 550 | 67  | 321 | 534 | 0.876 | 9.60E-02 | 1.02E+00 |  |  |
| rs1428558  | chr5 | 73,887,534 | 121 | 459 | 342 | 160 | 443 | 329 | 0.885 | 7.40E-02 | 1.13E+00 |  |  |
| rs298385   | chr5 | 73,890,920 | 143 | 457 | 320 | 169 | 433 | 329 | 0.958 | 5.50E-01 | 2.60E-01 |  |  |
| rs17560029 | chr5 | 73,891,614 | 12  | 205 | 703 | 18  | 195 | 718 | 1     | 9.90E-01 | 4.36E-03 |  |  |
| rs1428557  | chr5 | 73,891,765 | 702 | 207 | 13  | 718 | 195 | 19  | 0.988 | 9.40E-01 | 2.69E-02 |  |  |
| rs4704147  | chr5 | 73,897,034 | 36  | 289 | 597 | 41  | 273 | 618 | 1.03  | 7.10E-01 | 1.49E-01 |  |  |
| rs300248   | chr5 | 73,914,951 | 501 | 365 | 56  | 539 | 337 | 56  | 0.909 | 2.20E-01 | 6.58E-01 |  |  |
| rs300252   | chr5 | 73,919,643 | 117 | 427 | 378 | 103 | 419 | 410 | 1.11  | 1.50E-01 | 8.24E-01 |  |  |
| rs300245   | chr5 | 73,922,447 | 242 | 474 | 206 | 272 | 444 | 216 | 0.959 | 5.40E-01 | 2.68E-01 |  |  |
| rs17560266 | chr5 | 73,929,865 | 746 | 169 | 7   | 767 | 159 | 6   | 0.917 | 4.70E-01 | 3.28E-01 |  |  |
| rs300262   | chr5 | 73,942,462 | 339 | 459 | 124 | 366 | 420 | 145 | 0.991 | 9.20E-01 | 3.62E-02 |  |  |
| rs300261   | chr5 | 73,943,589 | 493 | 369 | 59  | 525 | 348 | 59  | 0.927 | 3.30E-01 | 4.81E-01 |  |  |
| rs10079609 | chr5 | 73,954,372 | 711 | 200 | 11  | 702 | 211 | 19  | 1.13  | 2.50E-01 | 6.02E-01 |  |  |
| rs300259   | chr5 | 73,959,815 | 0   | 79  | 843 | 3   | 74  | 855 | 0.998 | 9.40E-01 | 2.69E-02 |  |  |
| rs10075142 | chr5 | 73,962,740 | 11  | 193 | 718 | 17  | 203 | 712 | 0.906 | 3.50E-01 | 4.56E-01 |  |  |
| rs300240   | chr5 | 73,966,198 | 387 | 416 | 119 | 404 | 405 | 123 | 0.977 | 7.60E-01 | 1.19E-01 |  |  |
| rs10474420 | chr5 | 73,970,030 | 711 | 200 | 11  | 709 | 206 | 17  | 1.08  | 4.70E-01 | 3.28E-01 |  |  |
| rs1039321  | chr5 | 73,973,262 | 546 | 321 | 55  | 567 | 317 | 48  | 0.933 | 4.00E-01 | 3.98E-01 |  |  |
| rs7704467  | chr5 | 73,979,865 | 110 | 411 | 401 | 118 | 399 | 415 | 1.01  | 9.50E-01 | 2.23E-02 |  |  |
| rs6864196  | chr5 | 73,980,200 | 706 | 204 | 12  | 711 | 205 | 16  | 1.03  | 7.90E-01 | 1.02E-01 |  |  |
| rs2173673  | chr5 | 73,981,854 | 546 | 321 | 55  | 563 | 314 | 55  | 0.965 | 6.80E-01 | 1.67E-01 |  |  |
| rs9942341  | chr5 | 73,982,920 | 60  | 324 | 538 | 50  | 331 | 547 | 1.05  | 5.70E-01 | 2.44E-01 |  |  |
| rs13173835 | chr5 | 73,983,347 | 129 | 416 | 377 | 137 | 409 | 386 | 0.996 | 9.80E-01 | 8.77E-03 |  |  |
| rs10058135 | chr5 | 73,984,765 | 777 | 139 | 6   | 777 | 146 | 9   | 1.08  | 5.40E-01 | 2.68E-01 |  |  |
| rs4703638  | chr5 | 73,987,489 | 56  | 274 | 588 | 56  | 328 | 545 | 0.858 | 5.80E-02 | 1.24E+00 |  |  |
| rs12152861 | chr5 | 73,990,375 | 264 | 445 | 213 | 238 | 466 | 228 | 1.09  | 1.90E-01 | 7.21E-01 |  |  |
| rs16872154 | chr5 | 73,991,036 | 39  | 325 | 558 | 55  | 316 | 561 | 0.944 | 4.90E-01 | 3.10E-01 |  |  |
| rs4703640  | chr5 | 73,994,001 | 73  | 333 | 516 | 80  | 360 | 492 | 0.907 | 2.00E-01 | 6.99E-01 |  |  |
| rs2454847  | chr5 | 73,995,388 | 67  | 349 | 506 | 64  | 312 | 556 | 1.15  | 7.40E-02 | 1.13E+00 |  |  |
| rs820857   | chr5 | 73,996,748 | 448 | 384 | 90  | 486 | 357 | 89  | 0.914 | 2.20E-01 | 6.58E-01 |  |  |
| rs820853   | chr5 | 73,998,262 | 335 | 419 | 168 | 323 | 450 | 159 | 1.01  | 9.00E-01 | 4.58E-02 |  |  |
| rs820848   | chr5 | 74,000,416 | 441 | 379 | 102 | 482 | 359 | 91  | 0.884 | 9.30E-02 | 1.03E+00 |  |  |
| rs820846   | chr5 | 74,001,266 | 163 | 420 | 339 | 155 | 451 | 326 | 0.985 | 8.40E-01 | 7.57E-02 |  |  |
| rs6453072  | chr5 | 74,002,657 | 267 | 472 | 183 | 270 | 478 | 184 | 0.998 | 1.00E+00 | 0.00E+00 |  |  |
| rs820844   | chr5 | 74,003,720 | 156 | 436 | 330 | 171 | 462 | 299 | 0.9   | 1.20E-01 | 9.21E-01 |  |  |
| rs16872173 | chr5 | 74,004,814 | 706 | 199 | 17  | 705 | 212 | 15  | 1.03  | 7.90E-01 | 1.02E-01 |  |  |
| rs820841   | chr5 | 74,006,353 | 254 | 473 | 192 | 281 | 461 | 188 | 0.937 | 3.40E-01 | 4.69E-01 |  |  |
| rs820840   | chr5 | 74,006,863 | 158 | 439 | 324 | 152 | 427 | 353 | 1.08  | 2.90E-01 | 5.38E-01 |  |  |
| rs11749103 | chr5 | 74,007,533 | 710 | 201 | 11  | 721 | 195 | 16  | 1.01  | 9.80E-01 | 8.77E-03 |  |  |
| rs11748460 | chr5 | 74,010,243 | 3   | 106 | 813 | 7   | 102 | 823 | 0.974 | 9.00E-01 | 4.58E-02 |  |  |
| rs3846656  | chr5 | 74,013,224 | 0   | 1   | 921 | 0   | 0   | 932 | 0     | 5.00E-01 | 3.01E-01 |  |  |
| rs820870   | chr5 | 74,015,867 | 279 | 469 | 174 | 298 | 465 | 169 | 0.951 | 4.70E-01 | 3.28E-01 |  |  |
| rs820880   | chr5 | 74,018,081 | 474 | 382 | 65  | 516 | 351 | 65  | 0.903 | 1.80E-01 | 7.45E-01 |  |  |
| rs11556045 | chr5 | 74,020,971 | 592 | 302 | 28  | 641 | 265 | 26  | 0.851 | 6.30E-02 | 1.20E+00 |  |  |
| rs820889   | chr5 | 74,021,290 | 3   | 148 | 771 | 12  | 139 | 781 | 0.951 | 7.10E-01 | 1.49E-01 |  |  |
| rs3756443  | chr5 | 74,023,302 | 590 | 303 | 28  | 641 | 265 | 26  | 0.846 | 5.60E-02 | 1.25E+00 |  |  |
| rs3756444  | chr5 | 74,023,531 | 380 | 422 | 117 | 402 | 423 | 105 | 0.93  | 3.10E-01 | 5.09E-01 |  |  |
| rs1696979  | chr5 | 74,028,162 | 131 | 440 | 345 | 141 | 446 | 337 | 0.956 | 5.30E-01 | 2.76E-01 |  |  |
| rs10805890 | chr5 | 74,028,637 | 648 | 249 | 25  | 643 | 261 | 28  | 1.06  | 5.50E-01 | 2.60E-01 |  |  |
| rs820834   | chr5 | 74,034,961 | 5   | 149 | 768 | 9   | 156 | 767 | 0.917 | 4.80E-01 | 3.19E-01 |  |  |
| rs820827   | chr5 | 74,037,733 | 740 | 170 | 8   | 723 | 197 | 10  | 1.17  | 1.50E-01 | 8.24E-01 |  |  |
| rs17561000 | chr5 | 74,045,083 | 770 | 142 | 10  | 772 | 153 | 7   | 1.02  | 9.00E-01 | 4.58E-02 |  |  |
| rs6453074  | chr5 | 74,049,367 | 46  | 309 | 561 | 42  | 284 | 597 | 1.13  | 1.60E-01 | 7.96E-01 |  |  |
| rs6867972  | chr5 | 74,051,106 | 334 | 434 | 153 | 311 | 464 | 156 | 1.06  | 3.70E-01 | 4.32E-01 |  |  |
| rs7705519  | chr5 | 74,092,269 | 688 | 205 | 26  | 702 | 209 | 21  | 0.957 | 6.80E-01 | 1.67E-01 |  |  |
| rs11948188 | chr5 | 74,093,839 | 56  | 305 | 559 | 48  | 330 | 552 | 0.986 | 8.90E-01 | 5.06E-02 |  |  |
| rs10942719 | chr5 | 74,094,154 | 328 | 429 | 165 | 335 | 429 | 167 | 0.992 | 9.40E-01 | 2.69E-02 |  |  |
| rs10515193 | chr5 | 74,094,847 | 712 | 202 | 8   | 699 | 215 | 18  | 1.16  | 1.50E-01 | 8.24E-01 |  |  |
| rs1164694  | chr5 | 74,102,142 | 857 | 61  | 4   | 850 | 81  | 1   | 1.2   | 3.10E-01 | 5.09E-01 |  |  |
| rs6453083  | chr5 | 74,111,114 | 117 | 402 | 394 | 115 | 435 | 368 | 0.941 | 4.00E-01 | 3.98E-01 |  |  |
| rs10044287 | chr5 | 74,131,298 | 607 | 277 | 38  | 588 | 296 | 47  | 1.12  | 1.80E-01 | 7.45E-01 |  |  |
| rs6866082  | chr5 | 74,132,165 | 55  | 305 | 562 | 46  | 330 | 556 | 0.992 | 9.50E-01 | 2.23E-02 |  |  |
| rs6881400  | chr5 | 74,152,776 | 712 | 194 | 16  | 738 | 179 | 15  | 0.904 | 3.50E-01 | 4.56E-01 |  |  |
| rs6877116  | chr5 | 74,155,058 | 43  | 290 | 555 | 39  | 298 | 564 | 1.02  | 8.50E-01 | 7.06E-02 |  |  |
| rs2218517  | chr5 | 74,157,402 | 56  | 332 | 534 | 46  | 329 | 557 | 1.09  | 3.00E-01 | 5.23E-01 |  |  |
| rs1164624  | chr5 | 74,178,621 | 318 | 439 | 165 | 290 | 471 | 171 | 1.08  | 2.50E-01 | 6.02E-01 |  |  |
| rs17738565 | chr5 | 74,179,544 | 765 | 149 | 5   | 767 | 154 | 9   | 1.08  | 5.60E-01 | 2.52E-01 |  |  |
| rs10062244 | chr5 | 74,204,801 | 1   | 144 | 777 | 8   | 150 | 774 | 0.88  | 3.10E-01 | 5.09E-01 |  |  |
| rs11739301 | chr5 | 74,208,224 | 33  | 274 | 615 | 31  | 269 | 632 | 1.05  | 6.20E-01 | 2.08E-01 |  |  |
| rs10942722 | chr5 | 74,219,900 | 338 | 446 | 138 | 347 | 442 | 143 | 0.996 | 9.80E-01 | 8.77E-03 |  |  |

|            |      |            |     |     |     |     |     |     |       |          |          |  |  |
|------------|------|------------|-----|-----|-----|-----|-----|-----|-------|----------|----------|--|--|
| rs12519932 | chr5 | 74,233,709 | 439 | 406 | 76  | 449 | 398 | 85  | 1.01  | 9.30E-01 | 3.15E-02 |  |  |
| rs11745686 | chr5 | 74,234,367 | 441 | 406 | 75  | 450 | 397 | 85  | 1.01  | 8.90E-01 | 5.06E-02 |  |  |
| rs11746561 | chr5 | 74,248,684 | 34  | 278 | 610 | 32  | 272 | 628 | 1.05  | 5.90E-01 | 2.29E-01 |  |  |
| rs7722269  | chr5 | 74,251,060 | 8   | 190 | 722 | 14  | 203 | 714 | 0.89  | 2.80E-01 | 5.53E-01 |  |  |
| rs6878227  | chr5 | 74,257,948 | 65  | 356 | 501 | 74  | 343 | 515 | 1     | 9.80E-01 | 8.77E-03 |  |  |
| rs6453096  | chr5 | 74,272,205 | 750 | 156 | 16  | 768 | 152 | 9   | 0.887 | 3.10E-01 | 5.09E-01 |  |  |
| rs7728102  | chr5 | 74,275,132 | 568 | 299 | 55  | 596 | 299 | 37  | 0.878 | 1.10E-01 | 9.59E-01 |  |  |
| rs9293636  | chr5 | 74,275,702 | 15  | 191 | 716 | 9   | 181 | 742 | 1.14  | 2.30E-01 | 6.38E-01 |  |  |
| rs3934476  | chr5 | 74,278,608 | 287 | 460 | 175 | 289 | 473 | 170 | 0.987 | 8.70E-01 | 6.05E-02 |  |  |
| rs7356745  | chr5 | 74,278,876 | 728 | 182 | 12  | 737 | 183 | 12  | 0.993 | 9.90E-01 | 4.36E-03 |  |  |
| rs6453099  | chr5 | 74,295,306 | 149 | 434 | 339 | 145 | 453 | 334 | 0.993 | 9.50E-01 | 2.23E-02 |  |  |
| rs4392601  | chr5 | 74,298,736 | 504 | 357 | 61  | 515 | 351 | 66  | 0.997 | 9.90E-01 | 4.36E-03 |  |  |
| rs10069744 | chr5 | 74,299,211 | 749 | 160 | 13  | 751 | 168 | 13  | 1.04  | 7.90E-01 | 1.02E-01 |  |  |
| rs10043960 | chr5 | 74,302,099 | 543 | 323 | 56  | 544 | 336 | 52  | 1     | 9.80E-01 | 8.77E-03 |  |  |
| rs13182265 | chr5 | 74,305,480 | 27  | 236 | 659 | 23  | 254 | 655 | 0.973 | 7.90E-01 | 1.02E-01 |  |  |
| rs6870053  | chr5 | 74,312,322 | 353 | 433 | 136 | 356 | 449 | 126 | 0.975 | 7.40E-01 | 1.31E-01 |  |  |
| rs6867482  | chr5 | 74,316,736 | 179 | 438 | 305 | 169 | 474 | 289 | 0.984 | 8.30E-01 | 8.09E-02 |  |  |
| rs7707671  | chr5 | 74,323,498 | 454 | 370 | 98  | 455 | 386 | 91  | 0.99  | 9.10E-01 | 4.10E-02 |  |  |
| rs6453104  | chr5 | 74,324,825 | 347 | 425 | 148 | 339 | 453 | 135 | 0.992 | 9.30E-01 | 3.15E-02 |  |  |
| rs6894634  | chr5 | 74,336,369 | 56  | 360 | 506 | 62  | 369 | 501 | 0.957 | 5.80E-01 | 2.37E-01 |  |  |
| rs12651778 | chr5 | 74,337,389 | 5   | 115 | 802 | 5   | 126 | 801 | 0.924 | 5.80E-01 | 2.37E-01 |  |  |
| rs7721887  | chr5 | 74,337,608 | 775 | 142 | 4   | 774 | 152 | 6   | 1.09  | 5.10E-01 | 2.92E-01 |  |  |
| rs3811986  | chr5 | 74,360,193 | 55  | 366 | 501 | 60  | 374 | 498 | 0.965 | 6.60E-01 | 1.80E-01 |  |  |
| rs4704166  | chr5 | 74,360,658 | 54  | 367 | 501 | 60  | 374 | 498 | 0.962 | 6.30E-01 | 2.01E-01 |  |  |
| rs7734427  | chr5 | 74,363,824 | 55  | 366 | 501 | 60  | 374 | 498 | 0.965 | 6.60E-01 | 1.80E-01 |  |  |
| rs11955513 | chr5 | 74,372,639 | 8   | 151 | 763 | 7   | 148 | 776 | 1.05  | 7.50E-01 | 1.25E-01 |  |  |
| rs7714420  | chr5 | 74,376,083 | 480 | 371 | 71  | 478 | 391 | 63  | 0.996 | 9.80E-01 | 8.77E-03 |  |  |
| rs9293641  | chr5 | 74,381,125 | 14  | 151 | 757 | 10  | 153 | 769 | 1.05  | 7.00E-01 | 1.55E-01 |  |  |
| rs7700965  | chr5 | 74,392,613 | 381 | 425 | 116 | 407 | 418 | 107 | 0.927 | 2.90E-01 | 5.38E-01 |  |  |
| rs3923323  | chr5 | 74,407,897 | 649 | 240 | 33  | 667 | 243 | 22  | 0.915 | 3.40E-01 | 4.69E-01 |  |  |
| rs4345300  | chr5 | 74,412,327 | 117 | 424 | 381 | 108 | 418 | 406 | 1.08  | 3.00E-01 | 5.23E-01 |  |  |
| rs4301212  | chr5 | 74,444,735 | 24  | 239 | 657 | 20  | 237 | 671 | 1.05  | 6.00E-01 | 2.22E-01 |  |  |
| rs2035191  | chr5 | 74,449,469 | 637 | 252 | 33  | 651 | 258 | 22  | 0.929 | 4.30E-01 | 3.67E-01 |  |  |
| rs6453116  | chr5 | 74,457,542 | 721 | 190 | 11  | 748 | 174 | 10  | 0.894 | 3.10E-01 | 5.09E-01 |  |  |
| rs717587   | chr5 | 74,469,591 | 716 | 188 | 11  | 746 | 169 | 10  | 0.878 | 2.40E-01 | 6.20E-01 |  |  |
| rs1422698  | chr5 | 74,478,888 | 115 | 419 | 375 | 105 | 412 | 402 | 1.09  | 2.50E-01 | 6.02E-01 |  |  |
| rs10054860 | chr5 | 74,482,560 | 571 | 307 | 44  | 586 | 304 | 42  | 0.964 | 6.80E-01 | 1.67E-01 |  |  |
| rs7378985  | chr5 | 74,490,823 | 11  | 175 | 736 | 10  | 157 | 765 | 1.14  | 2.50E-01 | 6.02E-01 |  |  |
| rs6872586  | chr5 | 74,492,233 | 13  | 208 | 699 | 13  | 184 | 733 | 1.14  | 2.00E-01 | 6.99E-01 |  |  |
| rs9293646  | chr5 | 74,495,327 | 886 | 36  | 0   | 892 | 40  | 0   | 1.1   | 7.60E-01 | 1.19E-01 |  |  |
| rs7726659  | chr5 | 74,513,834 | 897 | 22  | 0   | 915 | 17  | 0   | 0.76  | 4.90E-01 | 3.10E-01 |  |  |
| rs2219745  | chr5 | 74,542,414 | 44  | 307 | 569 | 43  | 302 | 585 | 1.04  | 6.80E-01 | 1.67E-01 |  |  |
| rs6866661  | chr5 | 74,570,128 | 375 | 428 | 119 | 398 | 422 | 112 | 0.938 | 3.70E-01 | 4.32E-01 |  |  |
| rs1551894  | chr5 | 74,606,287 | 38  | 307 | 577 | 36  | 307 | 589 | 1.03  | 7.70E-01 | 1.14E-01 |  |  |
| rs1423528  | chr5 | 74,632,733 | 826 | 93  | 0   | 825 | 103 | 3   | 1.17  | 3.20E-01 | 4.95E-01 |  |  |
| rs2335418  | chr5 | 74,639,235 | 166 | 431 | 325 | 151 | 471 | 310 | 0.996 | 9.80E-01 | 8.77E-03 |  |  |
| rs4703666  | chr5 | 74,642,616 | 830 | 91  | 1   | 829 | 99  | 4   | 1.15  | 3.90E-01 | 4.09E-01 |  |  |
| rs13358429 | chr5 | 74,653,942 | 104 | 395 | 408 | 99  | 403 | 417 | 1.02  | 7.50E-01 | 1.25E-01 |  |  |
| rs13354746 | chr5 | 74,654,888 | 40  | 323 | 550 | 39  | 319 | 560 | 1.03  | 7.70E-01 | 1.14E-01 |  |  |
| rs3761739  | chr5 | 74,667,257 | 13  | 224 | 685 | 21  | 243 | 668 | 0.869 | 1.50E-01 | 8.24E-01 |  |  |
| rs3761740  | chr5 | 74,667,889 | 4   | 150 | 768 | 9   | 162 | 761 | 0.877 | 2.70E-01 | 5.69E-01 |  |  |
| rs2303152  | chr5 | 74,677,463 | 8   | 160 | 754 | 12  | 165 | 753 | 0.933 | 5.70E-01 | 2.44E-01 |  |  |
| rs11742194 | chr5 | 74,682,634 | 3   | 151 | 757 | 7   | 162 | 750 | 0.89  | 3.40E-01 | 4.69E-01 |  |  |
| rs3846662  | chr5 | 74,686,840 | 315 | 439 | 168 | 306 | 470 | 156 | 0.997 | 9.90E-01 | 4.36E-03 |  |  |
| rs5909     | chr5 | 74,691,931 | 3   | 151 | 768 | 7   | 164 | 761 | 0.881 | 3.00E-01 | 5.23E-01 |  |  |
| rs16872536 | chr5 | 74,714,241 | 4   | 146 | 772 | 10  | 150 | 772 | 0.908 | 4.40E-01 | 3.57E-01 |  |  |
| rs3761742  | chr5 | 74,714,693 | 31  | 306 | 562 | 36  | 308 | 573 | 0.985 | 8.80E-01 | 5.55E-02 |  |  |
| rs6453133  | chr5 | 74,728,532 | 462 | 376 | 79  | 461 | 399 | 70  | 0.993 | 9.60E-01 | 1.77E-02 |  |  |
| rs4385188  | chr5 | 74,770,118 | 525 | 350 | 47  | 548 | 334 | 50  | 0.957 | 6.00E-01 | 2.22E-01 |  |  |
| rs6872314  | chr5 | 74,771,821 | 525 | 350 | 47  | 549 | 332 | 51  | 0.957 | 6.00E-01 | 2.22E-01 |  |  |
| rs12659791 | chr5 | 74,793,514 | 683 | 224 | 13  | 665 | 244 | 22  | 1.16  | 1.10E-01 | 9.59E-01 |  |  |
| rs6896136  | chr5 | 74,823,066 | 361 | 427 | 134 | 338 | 465 | 129 | 1.05  | 5.10E-01 | 2.92E-01 |  |  |
| rs10055011 | chr5 | 74,833,912 | 12  | 212 | 697 | 12  | 192 | 727 | 1.12  | 2.80E-01 | 5.53E-01 |  |  |
| rs5744545  | chr5 | 74,844,173 | 10  | 191 | 721 | 9   | 181 | 742 | 1.08  | 4.90E-01 | 3.10E-01 |  |  |
| rs3756558  | chr5 | 74,898,797 | 680 | 228 | 14  | 664 | 248 | 20  | 1.13  | 1.90E-01 | 7.21E-01 |  |  |
| rs3097154  | chr5 | 74,906,574 | 919 | 2   | 0   | 932 | 0   | 0   | 0     | 2.50E-01 | 6.02E-01 |  |  |
| rs5744661  | chr5 | 74,910,746 | 4   | 145 | 773 | 10  | 150 | 772 | 0.902 | 4.10E-01 | 3.87E-01 |  |  |
| rs3213801  | chr5 | 74,913,022 | 9   | 154 | 751 | 10  | 189 | 728 | 0.817 | 7.10E-02 | 1.15E+00 |  |  |
| rs5744680  | chr5 | 74,915,646 | 132 | 428 | 362 | 121 | 467 | 344 | 0.979 | 7.70E-01 | 1.14E-01 |  |  |
| rs5744707  | chr5 | 74,926,374 | 762 | 156 | 4   | 755 | 170 | 7   | 1.12  | 3.30E-01 | 4.81E-01 |  |  |

|            |      |            |     |     |     |     |     |     |       |          |          |  |  |
|------------|------|------------|-----|-----|-----|-----|-----|-----|-------|----------|----------|--|--|
| rs1051795  | chr5 | 74,932,554 | 37  | 317 | 568 | 37  | 313 | 582 | 1.03  | 7.70E-01 | 1.14E-01 |  |  |
| rs904743   | chr5 | 74,953,618 | 688 | 219 | 15  | 716 | 202 | 14  | 0.902 | 3.10E-01 | 5.09E-01 |  |  |
| rs16872661 | chr5 | 74,959,688 | 1   | 46  | 874 | 1   | 43  | 888 | 1.08  | 7.90E-01 | 1.02E-01 |  |  |
| rs924452   | chr5 | 74,959,712 | 36  | 320 | 565 | 37  | 310 | 581 | 1.04  | 6.90E-01 | 1.61E-01 |  |  |
| rs253407   | chr5 | 74,962,534 | 68  | 380 | 474 | 74  | 359 | 499 | 1.04  | 6.20E-01 | 2.08E-01 |  |  |
| rs34344    | chr5 | 74,971,581 | 60  | 372 | 485 | 70  | 339 | 511 | 1.04  | 6.10E-01 | 2.15E-01 |  |  |
| rs16872693 | chr5 | 74,982,211 | 1   | 50  | 871 | 2   | 43  | 887 | 1.12  | 6.40E-01 | 1.94E-01 |  |  |
| rs16872698 | chr5 | 74,983,191 | 874 | 47  | 1   | 887 | 43  | 2   | 0.948 | 8.80E-01 | 5.55E-02 |  |  |
| rs10942740 | chr5 | 74,984,799 | 921 | 1   | 0   | 932 | 0   | 0   | 0     | 5.00E-01 | 3.01E-01 |  |  |
| rs7717355  | chr5 | 74,987,657 | 11  | 142 | 769 | 10  | 153 | 769 | 0.954 | 7.20E-01 | 1.43E-01 |  |  |
| rs253414   | chr5 | 74,992,273 | 420 | 406 | 96  | 427 | 405 | 96  | 0.988 | 8.90E-01 | 5.06E-02 |  |  |
| rs16872726 | chr5 | 74,994,052 | 1   | 59  | 862 | 1   | 63  | 863 | 0.942 | 8.10E-01 | 9.15E-02 |  |  |
| rs34355    | chr5 | 74,995,726 | 601 | 283 | 38  | 598 | 294 | 40  | 1.04  | 6.80E-01 | 1.67E-01 |  |  |
| rs6453138  | chr5 | 74,996,114 | 921 | 0   | 1   | 930 | 2   | 0   | 0.989 | 1.00E+00 | 0.00E+00 |  |  |
| rs6453139  | chr5 | 74,998,524 | 4   | 81  | 837 | 4   | 90  | 838 | 0.914 | 6.00E-01 | 2.22E-01 |  |  |
| rs11750595 | chr5 | 74,999,356 | 807 | 105 | 7   | 822 | 107 | 3   | 0.932 | 6.50E-01 | 1.87E-01 |  |  |
| rs34358    | chr5 | 75,000,878 | 409 | 414 | 99  | 408 | 416 | 108 | 1.03  | 6.70E-01 | 1.74E-01 |  |  |
| rs10056022 | chr5 | 75,005,171 | 7   | 111 | 804 | 4   | 111 | 817 | 1.07  | 6.80E-01 | 1.67E-01 |  |  |
| rs17648910 | chr5 | 75,006,312 | 814 | 103 | 5   | 824 | 105 | 3   | 0.97  | 8.80E-01 | 5.55E-02 |  |  |
| rs888786   | chr5 | 75,006,606 | 22  | 208 | 692 | 21  | 225 | 686 | 0.947 | 6.00E-01 | 2.22E-01 |  |  |
| rs2303647  | chr5 | 75,009,635 | 7   | 147 | 768 | 10  | 148 | 773 | 0.965 | 8.00E-01 | 9.69E-02 |  |  |
| rs253388   | chr5 | 75,011,668 | 70  | 342 | 507 | 66  | 355 | 509 | 1     | 9.90E-01 | 4.36E-03 |  |  |
| rs253390   | chr5 | 75,013,417 | 72  | 351 | 497 | 72  | 355 | 505 | 1.01  | 9.60E-01 | 1.77E-02 |  |  |
| rs194137   | chr5 | 75,014,613 | 499 | 351 | 72  | 506 | 354 | 72  | 0.994 | 9.60E-01 | 1.77E-02 |  |  |
| rs17649248 | chr5 | 75,034,182 | 41  | 289 | 592 | 40  | 297 | 595 | 0.993 | 9.70E-01 | 1.32E-02 |  |  |
| rs2307111  | chr5 | 75,039,434 | 345 | 438 | 138 | 354 | 431 | 146 | 1     | 9.90E-01 | 4.36E-03 |  |  |
| rs17649332 | chr5 | 75,039,634 | 591 | 289 | 41  | 594 | 297 | 40  | 1.01  | 9.70E-01 | 1.32E-02 |  |  |
| rs4640771  | chr5 | 75,047,529 | 0   | 1   | 921 | 0   | 0   | 931 | 0     | 5.00E-01 | 3.01E-01 |  |  |
| rs7730317  | chr5 | 75,048,073 | 6   | 146 | 770 | 10  | 146 | 776 | 0.959 | 7.60E-01 | 1.19E-01 |  |  |
| rs2291631  | chr5 | 75,048,792 | 4   | 79  | 838 | 4   | 88  | 839 | 0.912 | 5.90E-01 | 2.29E-01 |  |  |
| rs6867195  | chr5 | 75,051,345 | 0   | 1   | 920 | 0   | 0   | 931 | 0     | 5.00E-01 | 3.01E-01 |  |  |
| rs7715806  | chr5 | 75,070,143 | 132 | 417 | 373 | 122 | 420 | 390 | 1.06  | 4.30E-01 | 3.67E-01 |  |  |
| rs1001935  | chr5 | 75,075,936 | 6   | 145 | 771 | 4   | 124 | 804 | 1.22  | 1.20E-01 | 9.21E-01 |  |  |
| rs258497   | chr5 | 75,080,441 | 180 | 457 | 284 | 161 | 452 | 319 | 1.12  | 8.80E-02 | 1.06E+00 |  |  |
| rs795024   | chr5 | 75,109,450 | 280 | 461 | 181 | 322 | 442 | 168 | 0.889 | 8.10E-02 | 1.09E+00 |  |  |
| rs7725316  | chr5 | 75,132,315 | 124 | 438 | 360 | 127 | 412 | 393 | 1.07  | 3.70E-01 | 4.32E-01 |  |  |
| rs1525774  | chr5 | 75,133,141 | 193 | 455 | 271 | 176 | 437 | 319 | 1.15  | 3.90E-02 | 1.41E+00 |  |  |
| rs1464919  | chr5 | 75,139,565 | 421 | 410 | 91  | 458 | 382 | 92  | 0.922 | 2.70E-01 | 5.69E-01 |  |  |
| rs7709242  | chr5 | 75,147,153 | 421 | 409 | 91  | 458 | 382 | 92  | 0.923 | 2.70E-01 | 5.69E-01 |  |  |
| rs2049495  | chr5 | 75,158,571 | 75  | 390 | 456 | 73  | 361 | 494 | 1.1   | 1.90E-01 | 7.21E-01 |  |  |
| rs13158199 | chr5 | 75,164,186 | 287 | 478 | 156 | 332 | 444 | 156 | 0.909 | 1.60E-01 | 7.96E-01 |  |  |
| rs2049494  | chr5 | 75,170,912 | 158 | 476 | 288 | 156 | 443 | 333 | 1.11  | 1.40E-01 | 8.54E-01 |  |  |
| rs6891632  | chr5 | 75,174,199 | 265 | 487 | 169 | 304 | 457 | 171 | 0.925 | 2.50E-01 | 6.02E-01 |  |  |
| rs1546791  | chr5 | 75,179,469 | 722 | 188 | 12  | 734 | 182 | 16  | 0.998 | 9.70E-01 | 1.32E-02 |  |  |
| rs10805894 | chr5 | 75,182,012 | 169 | 485 | 266 | 170 | 456 | 303 | 1.08  | 2.60E-01 | 5.85E-01 |  |  |
| rs10515208 | chr5 | 75,195,675 | 659 | 238 | 21  | 668 | 238 | 22  | 0.996 | 1.00E+00 | 0.00E+00 |  |  |
| rs6891276  | chr5 | 75,196,222 | 21  | 240 | 658 | 23  | 240 | 667 | 0.997 | 9.90E-01 | 4.36E-03 |  |  |
| rs1464914  | chr5 | 75,209,785 | 534 | 340 | 48  | 553 | 326 | 53  | 0.974 | 7.70E-01 | 1.14E-01 |  |  |
| rs6859261  | chr5 | 75,210,354 | 7   | 153 | 762 | 7   | 147 | 778 | 1.05  | 7.00E-01 | 1.55E-01 |  |  |
| rs6860538  | chr5 | 75,210,382 | 9   | 161 | 752 | 9   | 153 | 770 | 1.06  | 6.20E-01 | 2.08E-01 |  |  |
| rs10474452 | chr5 | 75,211,038 | 214 | 498 | 210 | 250 | 460 | 222 | 0.95  | 4.50E-01 | 3.47E-01 |  |  |
| rs1357999  | chr5 | 75,215,969 | 777 | 138 | 7   | 793 | 133 | 6   | 0.939 | 6.50E-01 | 1.87E-01 |  |  |
| rs1404989  | chr5 | 75,220,176 | 695 | 211 | 16  | 711 | 202 | 19  | 0.974 | 8.20E-01 | 8.62E-02 |  |  |
| rs4704262  | chr5 | 75,227,206 | 481 | 368 | 70  | 507 | 350 | 72  | 0.948 | 5.00E-01 | 3.01E-01 |  |  |
| rs1525763  | chr5 | 75,236,640 | 896 | 25  | 1   | 908 | 23  | 1   | 0.915 | 8.60E-01 | 6.55E-02 |  |  |
| rs2222624  | chr5 | 75,246,011 | 788 | 128 | 6   | 803 | 123 | 6   | 0.95  | 7.30E-01 | 1.37E-01 |  |  |
| rs17650177 | chr5 | 75,250,155 | 15  | 223 | 684 | 18  | 211 | 703 | 1.04  | 7.10E-01 | 1.49E-01 |  |  |
| rs6863177  | chr5 | 75,251,076 | 9   | 136 | 777 | 6   | 132 | 794 | 1.09  | 5.20E-01 | 2.84E-01 |  |  |
| rs17564993 | chr5 | 75,251,726 | 39  | 315 | 567 | 45  | 291 | 596 | 1.06  | 5.30E-01 | 2.76E-01 |  |  |
| rs10942747 | chr5 | 75,252,167 | 293 | 482 | 147 | 323 | 465 | 144 | 0.933 | 3.10E-01 | 5.09E-01 |  |  |
| rs1917759  | chr5 | 75,256,689 | 42  | 321 | 558 | 45  | 298 | 588 | 1.07  | 4.20E-01 | 3.77E-01 |  |  |
| rs4487476  | chr5 | 75,265,370 | 246 | 462 | 213 | 233 | 467 | 232 | 1.07  | 3.10E-01 | 5.09E-01 |  |  |
| rs7729037  | chr5 | 75,266,283 | 59  | 373 | 490 | 80  | 383 | 469 | 0.883 | 9.60E-02 | 1.02E+00 |  |  |
| rs10076338 | chr5 | 75,266,403 | 36  | 296 | 590 | 37  | 284 | 611 | 1.05  | 5.90E-01 | 2.29E-01 |  |  |
| rs1357997  | chr5 | 75,268,145 | 234 | 466 | 222 | 222 | 470 | 240 | 1.07  | 3.40E-01 | 4.69E-01 |  |  |
| rs6453180  | chr5 | 75,269,863 | 245 | 463 | 213 | 232 | 468 | 232 | 1.07  | 3.10E-01 | 5.09E-01 |  |  |
| rs10075075 | chr5 | 75,274,068 | 592 | 291 | 39  | 613 | 283 | 36  | 0.94  | 4.80E-01 | 3.19E-01 |  |  |
| rs6895132  | chr5 | 75,274,886 | 547 | 325 | 43  | 572 | 308 | 49  | 0.965 | 6.90E-01 | 1.61E-01 |  |  |
| rs1917757  | chr5 | 75,283,433 | 8   | 160 | 754 | 5   | 171 | 756 | 0.981 | 9.10E-01 | 4.10E-02 |  |  |
| rs4704273  | chr5 | 75,290,699 | 400 | 403 | 119 | 422 | 432 | 78  | 0.865 | 4.10E-02 | 1.39E+00 |  |  |

|            |      |            |     |     |     |     |     |     |       |          |          |  |  |
|------------|------|------------|-----|-----|-----|-----|-----|-----|-------|----------|----------|--|--|
| rs11747018 | chr5 | 75,296,268 | 352 | 418 | 152 | 329 | 464 | 139 | 1.03  | 7.10E-01 | 1.49E-01 |  |  |
| rs11740550 | chr5 | 75,306,396 | 141 | 420 | 360 | 133 | 456 | 342 | 0.972 | 7.00E-01 | 1.55E-01 |  |  |
| rs7731991  | chr5 | 75,309,030 | 1   | 8   | 913 | 0   | 8   | 923 | 1.26  | 8.00E-01 | 9.69E-02 |  |  |
| rs12055083 | chr5 | 75,317,053 | 7   | 156 | 759 | 8   | 164 | 760 | 0.95  | 6.90E-01 | 1.61E-01 |  |  |
| rs6414964  | chr5 | 75,318,788 | 70  | 327 | 525 | 45  | 340 | 547 | 1.13  | 1.20E-01 | 9.21E-01 |  |  |
| rs4580755  | chr5 | 75,321,903 | 338 | 444 | 139 | 338 | 443 | 151 | 1.03  | 6.60E-01 | 1.80E-01 |  |  |
| rs12657643 | chr5 | 75,327,573 | 698 | 210 | 14  | 706 | 211 | 15  | 1     | 9.80E-01 | 8.77E-03 |  |  |
| rs4425488  | chr5 | 75,330,102 | 221 | 427 | 274 | 180 | 469 | 283 | 1.11  | 1.10E-01 | 9.59E-01 |  |  |
| rs6864642  | chr5 | 75,334,249 | 567 | 308 | 47  | 597 | 311 | 24  | 0.856 | 6.10E-02 | 1.21E+00 |  |  |
| rs11750465 | chr5 | 75,335,980 | 222 | 424 | 275 | 180 | 470 | 281 | 1.11  | 1.30E-01 | 8.86E-01 |  |  |
| rs6871717  | chr5 | 75,338,063 | 174 | 416 | 332 | 133 | 455 | 343 | 1.12  | 9.90E-02 | 1.00E+00 |  |  |
| rs4235691  | chr5 | 75,341,330 | 324 | 431 | 163 | 315 | 452 | 160 | 1.02  | 8.30E-01 | 8.09E-02 |  |  |
| rs4704278  | chr5 | 75,347,523 | 168 | 428 | 305 | 166 | 459 | 288 | 0.963 | 6.00E-01 | 2.22E-01 |  |  |
| rs4374745  | chr5 | 75,351,083 | 328 | 433 | 161 | 315 | 454 | 163 | 1.04  | 6.00E-01 | 2.22E-01 |  |  |
| rs9293664  | chr5 | 75,355,790 | 65  | 322 | 534 | 58  | 337 | 535 | 1.01  | 9.30E-01 | 3.15E-02 |  |  |
| rs1553311  | chr5 | 75,356,685 | 609 | 288 | 25  | 615 | 286 | 31  | 1.02  | 8.20E-01 | 8.62E-02 |  |  |
| rs1910051  | chr5 | 75,361,035 | 189 | 455 | 276 | 196 | 459 | 276 | 0.983 | 8.20E-01 | 8.62E-02 |  |  |
| rs10044546 | chr5 | 75,373,350 | 25  | 283 | 614 | 31  | 285 | 616 | 0.963 | 6.90E-01 | 1.61E-01 |  |  |
| rs10515216 | chr5 | 75,373,492 | 187 | 456 | 279 | 195 | 459 | 278 | 0.979 | 7.70E-01 | 1.14E-01 |  |  |
| rs10042012 | chr5 | 75,375,455 | 25  | 279 | 607 | 31  | 282 | 610 | 0.962 | 6.80E-01 | 1.67E-01 |  |  |
| rs258622   | chr5 | 75,424,590 | 189 | 474 | 259 | 187 | 461 | 284 | 1.06  | 4.10E-01 | 3.87E-01 |  |  |
| rs1423101  | chr5 | 75,431,572 | 65  | 326 | 531 | 58  | 333 | 539 | 1.03  | 7.00E-01 | 1.55E-01 |  |  |
| rs2081076  | chr5 | 75,437,493 | 920 | 2   | 0   | 931 | 1   | 0   | 0.494 | 6.20E-01 | 2.08E-01 |  |  |
| rs17673786 | chr5 | 75,439,893 | 607 | 288 | 27  | 612 | 290 | 30  | 1.02  | 8.90E-01 | 5.06E-02 |  |  |
| rs187727   | chr5 | 75,439,941 | 71  | 353 | 498 | 64  | 363 | 504 | 1.02  | 7.70E-01 | 1.14E-01 |  |  |
| rs13160383 | chr5 | 75,445,309 | 38  | 306 | 578 | 39  | 314 | 577 | 0.978 | 8.20E-01 | 8.62E-02 |  |  |
| rs10054931 | chr5 | 75,446,267 | 27  | 283 | 604 | 31  | 286 | 610 | 0.978 | 8.30E-01 | 8.09E-02 |  |  |
| rs183766   | chr5 | 75,446,387 | 421 | 410 | 91  | 436 | 399 | 97  | 0.987 | 8.80E-01 | 5.55E-02 |  |  |
| rs10043369 | chr5 | 75,447,560 | 29  | 285 | 608 | 31  | 289 | 612 | 0.985 | 8.90E-01 | 5.06E-02 |  |  |
| rs10434645 | chr5 | 75,457,862 | 641 | 256 | 24  | 630 | 274 | 28  | 1.09  | 3.50E-01 | 4.56E-01 |  |  |
| rs1021782  | chr5 | 75,459,306 | 312 | 442 | 168 | 324 | 434 | 174 | 0.99  | 9.10E-01 | 4.10E-02 |  |  |
| rs10514059 | chr5 | 75,460,983 | 408 | 401 | 113 | 392 | 423 | 117 | 1.06  | 4.50E-01 | 3.47E-01 |  |  |
| rs2112865  | chr5 | 75,465,359 | 788 | 132 | 2   | 789 | 138 | 5   | 1.08  | 5.60E-01 | 2.52E-01 |  |  |
| rs12657223 | chr5 | 75,467,195 | 540 | 320 | 61  | 530 | 341 | 60  | 1.04  | 6.20E-01 | 2.08E-01 |  |  |
| rs10514061 | chr5 | 75,471,124 | 25  | 235 | 658 | 23  | 227 | 681 | 1.07  | 4.90E-01 | 3.10E-01 |  |  |
| rs7701465  | chr5 | 75,472,145 | 172 | 439 | 310 | 188 | 436 | 306 | 0.954 | 5.00E-01 | 3.01E-01 |  |  |
| rs6453205  | chr5 | 75,474,978 | 325 | 433 | 164 | 319 | 432 | 181 | 1.06  | 4.30E-01 | 3.67E-01 |  |  |
| rs10051982 | chr5 | 75,477,632 | 6   | 107 | 807 | 6   | 103 | 822 | 1.05  | 7.70E-01 | 1.14E-01 |  |  |
| rs1895391  | chr5 | 75,481,681 | 218 | 453 | 249 | 224 | 453 | 249 | 0.987 | 8.60E-01 | 6.55E-02 |  |  |
| rs6879305  | chr5 | 75,485,883 | 219 | 482 | 221 | 227 | 459 | 246 | 1.04  | 6.00E-01 | 2.22E-01 |  |  |
| rs6887093  | chr5 | 75,491,007 | 4   | 100 | 811 | 5   | 109 | 811 | 0.912 | 5.50E-01 | 2.60E-01 |  |  |
| rs13167138 | chr5 | 75,494,053 | 23  | 234 | 665 | 24  | 222 | 686 | 1.06  | 5.80E-01 | 2.37E-01 |  |  |
| rs4610441  | chr5 | 75,494,157 | 289 | 472 | 160 | 305 | 463 | 164 | 0.977 | 7.50E-01 | 1.25E-01 |  |  |
| rs4704283  | chr5 | 75,506,572 | 142 | 467 | 313 | 151 | 456 | 325 | 1     | 1.00E+00 | 0.00E+00 |  |  |
| rs1553325  | chr5 | 75,507,473 | 312 | 466 | 144 | 325 | 455 | 152 | 0.993 | 9.40E-01 | 2.69E-02 |  |  |
| rs9293675  | chr5 | 75,510,536 | 312 | 464 | 144 | 325 | 455 | 152 | 0.994 | 9.50E-01 | 2.23E-02 |  |  |
| rs2055439  | chr5 | 75,511,014 | 286 | 462 | 174 | 294 | 441 | 197 | 1.04  | 6.20E-01 | 2.08E-01 |  |  |
| rs2358531  | chr5 | 75,515,542 | 481 | 385 | 55  | 498 | 360 | 74  | 1.02  | 8.20E-01 | 8.62E-02 |  |  |
| rs1002541  | chr5 | 75,518,658 | 301 | 466 | 155 | 327 | 432 | 173 | 0.986 | 8.60E-01 | 6.55E-02 |  |  |
| rs12655684 | chr5 | 75,528,458 | 43  | 258 | 621 | 34  | 259 | 639 | 1.08  | 4.00E-01 | 3.98E-01 |  |  |
| rs7448529  | chr5 | 75,530,752 | 180 | 443 | 299 | 190 | 472 | 270 | 0.916 | 2.00E-01 | 6.99E-01 |  |  |
| rs11741865 | chr5 | 75,532,899 | 4   | 131 | 787 | 6   | 138 | 788 | 0.932 | 6.10E-01 | 2.15E-01 |  |  |
| rs9293679  | chr5 | 75,538,611 | 110 | 412 | 393 | 103 | 447 | 378 | 0.972 | 7.10E-01 | 1.49E-01 |  |  |
| rs17566351 | chr5 | 75,539,999 | 44  | 301 | 577 | 38  | 271 | 623 | 1.17  | 6.40E-02 | 1.19E+00 |  |  |
| rs4703700  | chr5 | 75,544,306 | 68  | 376 | 478 | 65  | 366 | 501 | 1.06  | 4.50E-01 | 3.47E-01 |  |  |
| rs6870971  | chr5 | 75,554,185 | 109 | 434 | 376 | 110 | 411 | 411 | 1.07  | 3.20E-01 | 4.95E-01 |  |  |
| rs981113   | chr5 | 75,556,684 | 151 | 470 | 301 | 157 | 452 | 323 | 1.03  | 6.60E-01 | 1.80E-01 |  |  |
| rs1532696  | chr5 | 75,559,991 | 743 | 168 | 11  | 712 | 204 | 16  | 1.26  | 2.80E-02 | 1.55E+00 |  |  |
| rs7444555  | chr5 | 75,561,170 | 106 | 421 | 395 | 98  | 420 | 414 | 1.06  | 4.30E-01 | 3.67E-01 |  |  |
| rs11750299 | chr5 | 75,562,678 | 126 | 417 | 379 | 125 | 406 | 401 | 1.05  | 5.10E-01 | 2.92E-01 |  |  |
| rs10514063 | chr5 | 75,566,250 | 130 | 421 | 371 | 137 | 414 | 381 | 1     | 9.80E-01 | 8.77E-03 |  |  |
| rs11959133 | chr5 | 75,566,860 | 0   | 14  | 908 | 0   | 31  | 901 | 0.452 | 1.80E-02 | 1.74E+00 |  |  |
| rs1532699  | chr5 | 75,570,326 | 370 | 420 | 132 | 381 | 412 | 139 | 0.997 | 9.90E-01 | 4.36E-03 |  |  |
| rs11750504 | chr5 | 75,576,597 | 380 | 414 | 126 | 399 | 408 | 124 | 0.959 | 5.60E-01 | 2.52E-01 |  |  |
| rs6879020  | chr5 | 75,580,791 | 275 | 455 | 192 | 269 | 459 | 204 | 1.04  | 5.60E-01 | 2.52E-01 |  |  |
| rs10075253 | chr5 | 75,584,002 | 24  | 225 | 666 | 24  | 222 | 681 | 1.03  | 8.00E-01 | 9.69E-02 |  |  |
| rs6891999  | chr5 | 75,585,263 | 555 | 314 | 53  | 560 | 314 | 58  | 1.02  | 8.60E-01 | 6.55E-02 |  |  |
| rs12654150 | chr5 | 75,586,081 | 439 | 390 | 93  | 471 | 373 | 88  | 0.919 | 2.50E-01 | 6.02E-01 |  |  |
| rs6862529  | chr5 | 75,586,965 | 195 | 448 | 278 | 202 | 453 | 277 | 0.981 | 7.90E-01 | 1.02E-01 |  |  |
| rs10462538 | chr5 | 75,587,861 | 89  | 373 | 460 | 75  | 363 | 494 | 1.12  | 1.20E-01 | 9.21E-01 |  |  |

|            |      |            |     |     |     |     |     |     |       |          |          |  |  |
|------------|------|------------|-----|-----|-----|-----|-----|-----|-------|----------|----------|--|--|
| rs4481336  | chr5 | 75,597,667 | 48  | 279 | 595 | 43  | 278 | 611 | 1.05  | 5.70E-01 | 2.44E-01 |  |  |
| rs10064140 | chr5 | 75,598,554 | 89  | 373 | 460 | 79  | 404 | 449 | 0.987 | 8.90E-01 | 5.06E-02 |  |  |
| rs2972827  | chr5 | 75,598,829 | 49  | 279 | 594 | 45  | 279 | 607 | 1.04  | 6.60E-01 | 1.80E-01 |  |  |
| rs2937720  | chr5 | 75,599,937 | 91  | 389 | 441 | 103 | 369 | 460 | 1.01  | 9.50E-01 | 2.23E-02 |  |  |
| rs2937719  | chr5 | 75,600,193 | 242 | 445 | 235 | 244 | 442 | 246 | 1.02  | 7.90E-01 | 1.02E-01 |  |  |
| rs2972831  | chr5 | 75,602,262 | 9   | 178 | 734 | 10  | 190 | 731 | 0.937 | 5.70E-01 | 2.44E-01 |  |  |
| rs2937715  | chr5 | 75,603,809 | 364 | 449 | 109 | 385 | 428 | 119 | 0.981 | 8.10E-01 | 9.15E-02 |  |  |
| rs16873292 | chr5 | 75,603,935 | 795 | 122 | 4   | 785 | 144 | 3   | 1.15  | 2.80E-01 | 5.53E-01 |  |  |
| rs2937748  | chr5 | 75,607,788 | 774 | 142 | 6   | 792 | 137 | 3   | 0.912 | 4.80E-01 | 3.19E-01 |  |  |
| rs6874435  | chr5 | 75,610,611 | 708 | 202 | 12  | 717 | 199 | 16  | 1.01  | 9.40E-01 | 2.69E-02 |  |  |
| rs4566770  | chr5 | 75,612,069 | 12  | 201 | 709 | 14  | 199 | 719 | 1     | 9.80E-01 | 8.77E-03 |  |  |
| rs2358712  | chr5 | 75,616,443 | 775 | 142 | 5   | 797 | 132 | 3   | 0.89  | 3.70E-01 | 4.32E-01 |  |  |
| rs17566680 | chr5 | 75,622,692 | 33  | 315 | 574 | 44  | 302 | 585 | 0.983 | 8.60E-01 | 6.55E-02 |  |  |
| rs17747572 | chr5 | 75,624,777 | 756 | 149 | 5   | 778 | 134 | 8   | 0.927 | 5.60E-01 | 2.52E-01 |  |  |
| rs246813   | chr5 | 75,635,361 | 5   | 142 | 775 | 3   | 132 | 797 | 1.12  | 3.70E-01 | 4.32E-01 |  |  |
| rs2937746  | chr5 | 75,638,459 | 761 | 154 | 7   | 787 | 141 | 4   | 0.867 | 2.50E-01 | 6.02E-01 |  |  |
| rs2972844  | chr5 | 75,640,607 | 298 | 455 | 169 | 283 | 476 | 173 | 1.05  | 5.20E-01 | 2.84E-01 |  |  |
| rs4703705  | chr5 | 75,642,464 | 461 | 384 | 77  | 440 | 404 | 88  | 1.1   | 2.10E-01 | 6.78E-01 |  |  |
| rs2913261  | chr5 | 75,644,749 | 342 | 445 | 135 | 340 | 445 | 147 | 1.04  | 6.10E-01 | 2.15E-01 |  |  |
| rs2913257  | chr5 | 75,648,088 | 762 | 152 | 7   | 787 | 141 | 4   | 0.877 | 2.90E-01 | 5.38E-01 |  |  |
| rs10062226 | chr5 | 75,650,493 | 2   | 64  | 856 | 2   | 74  | 856 | 0.877 | 4.90E-01 | 3.10E-01 |  |  |
| rs3733860  | chr5 | 75,658,570 | 20  | 210 | 692 | 19  | 200 | 713 | 1.07  | 5.10E-01 | 2.92E-01 |  |  |
| rs2913251  | chr5 | 75,659,445 | 129 | 418 | 375 | 115 | 424 | 393 | 1.07  | 3.30E-01 | 4.81E-01 |  |  |
| rs6892721  | chr5 | 75,659,531 | 70  | 356 | 496 | 73  | 360 | 499 | 0.988 | 8.90E-01 | 5.06E-02 |  |  |
| rs17566917 | chr5 | 75,661,030 | 548 | 311 | 62  | 518 | 351 | 63  | 1.11  | 1.70E-01 | 7.70E-01 |  |  |
| rs31270    | chr5 | 75,661,170 | 303 | 452 | 165 | 333 | 452 | 147 | 0.903 | 1.30E-01 | 8.86E-01 |  |  |
| rs31269    | chr5 | 75,661,708 | 237 | 449 | 235 | 249 | 469 | 214 | 0.932 | 3.00E-01 | 5.23E-01 |  |  |
| rs10805900 | chr5 | 75,662,126 | 643 | 245 | 30  | 674 | 235 | 23  | 0.891 | 2.20E-01 | 6.58E-01 |  |  |
| rs16873320 | chr5 | 75,663,745 | 863 | 59  | 0   | 865 | 64  | 3   | 1.18  | 4.00E-01 | 3.98E-01 |  |  |
| rs31266    | chr5 | 75,664,169 | 216 | 447 | 259 | 193 | 462 | 277 | 1.09  | 2.00E-01 | 6.99E-01 |  |  |
| rs246819   | chr5 | 75,673,318 | 289 | 454 | 177 | 295 | 464 | 173 | 0.982 | 8.00E-01 | 9.69E-02 |  |  |
| rs246804   | chr5 | 75,678,242 | 175 | 459 | 287 | 174 | 465 | 293 | 1.01  | 8.80E-01 | 5.55E-02 |  |  |
| rs246801   | chr5 | 75,681,754 | 165 | 442 | 315 | 165 | 467 | 300 | 0.964 | 6.10E-01 | 2.15E-01 |  |  |
| rs246797   | chr5 | 75,683,386 | 103 | 404 | 415 | 97  | 417 | 418 | 1.01  | 8.70E-01 | 6.05E-02 |  |  |
| rs11748035 | chr5 | 75,687,542 | 769 | 143 | 10  | 760 | 160 | 12  | 1.13  | 3.10E-01 | 5.09E-01 |  |  |
| rs246789   | chr5 | 75,699,372 | 34  | 281 | 605 | 32  | 285 | 608 | 1.01  | 9.70E-01 | 1.32E-02 |  |  |
| rs246784   | chr5 | 75,705,230 | 613 | 279 | 28  | 619 | 281 | 31  | 1.01  | 9.00E-01 | 4.58E-02 |  |  |
| rs10514065 | chr5 | 75,711,075 | 93  | 392 | 437 | 107 | 401 | 424 | 0.927 | 3.00E-01 | 5.23E-01 |  |  |
| rs1811340  | chr5 | 75,712,414 | 70  | 368 | 484 | 79  | 372 | 481 | 0.957 | 5.70E-01 | 2.44E-01 |  |  |
| rs890708   | chr5 | 75,719,916 | 142 | 422 | 355 | 124 | 424 | 384 | 1.11  | 1.50E-01 | 8.24E-01 |  |  |
| rs16873342 | chr5 | 75,720,845 | 914 | 8   | 0   | 928 | 4   | 0   | 0.494 | 2.60E-01 | 5.85E-01 |  |  |
| rs875543   | chr5 | 75,728,732 | 710 | 193 | 19  | 695 | 220 | 17  | 1.1   | 3.50E-01 | 4.56E-01 |  |  |
| rs1984636  | chr5 | 75,734,047 | 712 | 192 | 18  | 696 | 219 | 17  | 1.11  | 3.00E-01 | 5.23E-01 |  |  |
| rs3886043  | chr5 | 75,739,841 | 237 | 473 | 212 | 229 | 470 | 233 | 1.06  | 3.60E-01 | 4.44E-01 |  |  |
| rs4296785  | chr5 | 75,746,539 | 30  | 246 | 646 | 28  | 271 | 633 | 0.935 | 4.70E-01 | 3.28E-01 |  |  |
| rs11749318 | chr5 | 75,758,425 | 224 | 461 | 235 | 252 | 466 | 214 | 0.9   | 1.20E-01 | 9.21E-01 |  |  |
| rs11741153 | chr5 | 75,760,741 | 728 | 180 | 14  | 719 | 200 | 13  | 1.09  | 4.50E-01 | 3.47E-01 |  |  |
| rs13183341 | chr5 | 75,763,487 | 112 | 429 | 381 | 121 | 446 | 363 | 0.934 | 3.30E-01 | 4.81E-01 |  |  |
| rs4130148  | chr5 | 75,775,087 | 728 | 179 | 15  | 720 | 198 | 14  | 1.08  | 4.90E-01 | 3.10E-01 |  |  |
| rs7730891  | chr5 | 75,776,998 | 898 | 23  | 1   | 911 | 21  | 0   | 0.829 | 6.30E-01 | 2.01E-01 |  |  |
| rs6880993  | chr5 | 75,782,569 | 3   | 117 | 802 | 2   | 126 | 804 | 0.953 | 7.60E-01 | 1.19E-01 |  |  |
| rs6898214  | chr5 | 75,787,217 | 219 | 437 | 266 | 191 | 460 | 281 | 1.1   | 1.70E-01 | 7.70E-01 |  |  |
| rs10942781 | chr5 | 75,787,730 | 542 | 332 | 45  | 596 | 300 | 34  | 0.828 | 2.10E-02 | 1.68E+00 |  |  |
| rs10474476 | chr5 | 75,789,080 | 47  | 332 | 543 | 34  | 302 | 596 | 1.21  | 1.80E-02 | 1.74E+00 |  |  |
| rs11739486 | chr5 | 75,789,455 | 455 | 390 | 77  | 455 | 391 | 86  | 1.03  | 6.70E-01 | 1.74E-01 |  |  |
| rs10045155 | chr5 | 75,793,312 | 51  | 319 | 552 | 56  | 346 | 529 | 0.907 | 2.20E-01 | 6.58E-01 |  |  |
| rs4529172  | chr5 | 75,794,828 | 541 | 333 | 48  | 595 | 302 | 35  | 0.822 | 1.60E-02 | 1.80E+00 |  |  |
| rs4452539  | chr5 | 75,795,960 | 279 | 460 | 183 | 252 | 493 | 186 | 1.07  | 3.30E-01 | 4.81E-01 |  |  |
| rs6859984  | chr5 | 75,805,324 | 516 | 344 | 61  | 499 | 370 | 63  | 1.07  | 3.80E-01 | 4.20E-01 |  |  |
| rs10070864 | chr5 | 75,810,816 | 843 | 78  | 1   | 857 | 68  | 7   | 1.01  | 9.90E-01 | 4.36E-03 |  |  |
| rs2068434  | chr5 | 75,815,227 | 144 | 439 | 339 | 137 | 476 | 319 | 0.967 | 6.40E-01 | 1.94E-01 |  |  |
| rs10942782 | chr5 | 75,817,046 | 249 | 438 | 235 | 241 | 469 | 222 | 0.99  | 9.00E-01 | 4.58E-02 |  |  |
| rs7711417  | chr5 | 75,822,160 | 170 | 473 | 279 | 203 | 442 | 287 | 0.945 | 4.10E-01 | 3.87E-01 |  |  |
| rs7727095  | chr5 | 75,831,163 | 235 | 463 | 224 | 222 | 462 | 248 | 1.08  | 2.40E-01 | 6.20E-01 |  |  |
| rs7710225  | chr5 | 75,837,093 | 287 | 472 | 163 | 279 | 457 | 196 | 1.1   | 1.70E-01 | 7.70E-01 |  |  |
| rs10054825 | chr5 | 75,837,339 | 10  | 185 | 727 | 13  | 187 | 732 | 0.969 | 8.10E-01 | 9.15E-02 |  |  |
| rs6453227  | chr5 | 75,840,861 | 618 | 280 | 22  | 615 | 290 | 24  | 1.04  | 6.70E-01 | 1.74E-01 |  |  |
| rs10079855 | chr5 | 75,844,964 | 14  | 219 | 689 | 20  | 230 | 682 | 0.913 | 3.60E-01 | 4.44E-01 |  |  |
| rs4704320  | chr5 | 75,844,989 | 73  | 353 | 495 | 89  | 383 | 460 | 0.863 | 4.70E-02 | 1.33E+00 |  |  |
| rs4438855  | chr5 | 75,848,437 | 11  | 151 | 760 | 4   | 149 | 779 | 1.13  | 3.30E-01 | 4.81E-01 |  |  |

|            |      |            |     |     |     |     |     |     |       |          |          |  |  |
|------------|------|------------|-----|-----|-----|-----|-----|-----|-------|----------|----------|--|--|
| rs4704322  | chr5 | 75,858,230 | 17  | 264 | 641 | 31  | 276 | 625 | 0.87  | 1.20E-01 | 9.21E-01 |  |  |
| rs6872396  | chr5 | 75,859,721 | 124 | 451 | 347 | 158 | 436 | 338 | 0.903 | 1.40E-01 | 8.54E-01 |  |  |
| rs6886903  | chr5 | 75,864,373 | 29  | 279 | 614 | 29  | 271 | 632 | 1.04  | 6.50E-01 | 1.87E-01 |  |  |
| rs9293688  | chr5 | 75,874,921 | 83  | 388 | 450 | 82  | 374 | 476 | 1.06  | 4.40E-01 | 3.57E-01 |  |  |
| rs4703712  | chr5 | 75,875,106 | 664 | 237 | 21  | 684 | 235 | 13  | 0.913 | 3.50E-01 | 4.56E-01 |  |  |
| rs4704330  | chr5 | 75,876,943 | 270 | 464 | 188 | 308 | 446 | 178 | 0.903 | 1.30E-01 | 8.86E-01 |  |  |
| rs6875519  | chr5 | 75,878,333 | 69  | 380 | 473 | 71  | 360 | 501 | 1.06  | 4.50E-01 | 3.47E-01 |  |  |
| rs879017   | chr5 | 75,878,727 | 871 | 51  | 0   | 884 | 48  | 0   | 0.929 | 8.00E-01 | 9.69E-02 |  |  |
| rs10942784 | chr5 | 75,889,806 | 178 | 465 | 267 | 173 | 448 | 296 | 1.08  | 2.80E-01 | 5.53E-01 |  |  |
| rs10072548 | chr5 | 75,890,974 | 66  | 388 | 468 | 72  | 366 | 494 | 1.04  | 5.90E-01 | 2.29E-01 |  |  |
| rs6453232  | chr5 | 75,896,451 | 260 | 462 | 199 | 299 | 447 | 186 | 0.895 | 9.90E-02 | 1.00E+00 |  |  |
| rs4704336  | chr5 | 75,899,375 | 255 | 460 | 206 | 292 | 450 | 190 | 0.893 | 9.20E-02 | 1.04E+00 |  |  |
| rs12523647 | chr5 | 75,899,743 | 0   | 53  | 869 | 0   | 52  | 880 | 1.03  | 9.60E-01 | 1.77E-02 |  |  |
| rs3756514  | chr5 | 75,907,035 | 0   | 53  | 869 | 0   | 51  | 881 | 1.05  | 8.80E-01 | 5.55E-02 |  |  |
| rs16873483 | chr5 | 75,907,106 | 659 | 243 | 20  | 694 | 222 | 16  | 0.87  | 1.50E-01 | 8.24E-01 |  |  |
| rs3797373  | chr5 | 75,908,204 | 547 | 336 | 37  | 569 | 329 | 30  | 0.925 | 3.50E-01 | 4.56E-01 |  |  |
| rs17748322 | chr5 | 75,911,385 | 618 | 272 | 32  | 651 | 254 | 26  | 0.883 | 1.60E-01 | 7.96E-01 |  |  |
| rs905164   | chr5 | 75,915,309 | 255 | 452 | 214 | 290 | 446 | 193 | 0.886 | 7.30E-02 | 1.14E+00 |  |  |
| rs3822528  | chr5 | 75,920,211 | 279 | 459 | 183 | 313 | 456 | 162 | 0.889 | 8.10E-02 | 1.09E+00 |  |  |
| rs1501788  | chr5 | 75,925,776 | 69  | 399 | 454 | 67  | 394 | 471 | 1.04  | 6.20E-01 | 2.08E-01 |  |  |
| rs1501787  | chr5 | 75,925,995 | 51  | 344 | 527 | 36  | 359 | 536 | 1.06  | 4.80E-01 | 3.19E-01 |  |  |
| rs9293690  | chr5 | 75,926,759 | 494 | 371 | 57  | 507 | 374 | 51  | 0.961 | 6.20E-01 | 2.08E-01 |  |  |
| rs11948805 | chr5 | 75,930,894 | 184 | 459 | 278 | 161 | 468 | 302 | 1.11  | 1.40E-01 | 8.54E-01 |  |  |
| rs1393098  | chr5 | 75,938,289 | 19  | 245 | 652 | 18  | 218 | 685 | 1.14  | 1.70E-01 | 7.70E-01 |  |  |
| rs3797390  | chr5 | 75,942,821 | 543 | 330 | 49  | 579 | 311 | 42  | 0.89  | 1.50E-01 | 8.24E-01 |  |  |
| rs2069693  | chr5 | 75,947,471 | 195 | 476 | 251 | 230 | 483 | 217 | 0.861 | 2.50E-02 | 1.60E+00 |  |  |
| rs961536   | chr5 | 75,948,599 | 210 | 486 | 226 | 183 | 484 | 264 | 1.15  | 3.70E-02 | 1.43E+00 |  |  |
| rs2069685  | chr5 | 75,949,061 | 314 | 449 | 151 | 343 | 466 | 117 | 0.871 | 4.50E-02 | 1.35E+00 |  |  |
| rs2069683  | chr5 | 75,949,540 | 909 | 13  | 0   | 925 | 7   | 0   | 0.531 | 2.50E-01 | 6.02E-01 |  |  |
| rs2069682  | chr5 | 75,950,485 | 1   | 51  | 870 | 2   | 46  | 884 | 1.07  | 8.00E-01 | 9.69E-02 |  |  |
| rs2069664  | chr5 | 75,952,190 | 184 | 468 | 270 | 213 | 485 | 233 | 0.866 | 3.10E-02 | 1.51E+00 |  |  |
| rs2069662  | chr5 | 75,952,359 | 3   | 109 | 807 | 1   | 109 | 819 | 1.05  | 7.70E-01 | 1.14E-01 |  |  |
| rs2069698  | chr5 | 75,952,643 | 1   | 59  | 862 | 1   | 73  | 858 | 0.816 | 2.80E-01 | 5.53E-01 |  |  |
| rs2069656  | chr5 | 75,953,389 | 54  | 303 | 565 | 45  | 329 | 558 | 0.989 | 9.20E-01 | 3.62E-02 |  |  |
| rs2069655  | chr5 | 75,953,476 | 14  | 241 | 667 | 15  | 236 | 681 | 1.03  | 8.20E-01 | 8.62E-02 |  |  |
| rs2069641  | chr5 | 75,955,505 | 423 | 392 | 84  | 414 | 402 | 102 | 1.09  | 2.40E-01 | 6.20E-01 |  |  |
| rs6881371  | chr5 | 75,958,425 | 488 | 361 | 73  | 458 | 387 | 87  | 1.14  | 8.70E-02 | 1.06E+00 |  |  |
| rs2455223  | chr5 | 75,959,368 | 338 | 433 | 151 | 330 | 434 | 168 | 1.06  | 3.90E-01 | 4.09E-01 |  |  |
| rs2431359  | chr5 | 75,960,769 | 840 | 79  | 3   | 854 | 75  | 3   | 0.94  | 7.60E-01 | 1.19E-01 |  |  |
| rs17567779 | chr5 | 75,961,672 | 1   | 94  | 827 | 5   | 87  | 838 | 0.998 | 9.50E-01 | 2.23E-02 |  |  |
| rs463815   | chr5 | 75,961,882 | 3   | 80  | 839 | 3   | 74  | 855 | 1.09  | 6.40E-01 | 1.94E-01 |  |  |
| rs3797410  | chr5 | 75,963,391 | 51  | 324 | 547 | 72  | 351 | 509 | 0.831 | 1.70E-02 | 1.77E+00 |  |  |
| rs7728450  | chr5 | 75,964,208 | 674 | 223 | 25  | 710 | 202 | 20  | 0.859 | 1.20E-01 | 9.21E-01 |  |  |
| rs6867296  | chr5 | 75,968,138 | 420 | 392 | 110 | 395 | 407 | 130 | 1.12  | 1.00E-01 | 1.00E+00 |  |  |
| rs2516272  | chr5 | 75,969,337 | 3   | 80  | 839 | 3   | 74  | 855 | 1.09  | 6.40E-01 | 1.94E-01 |  |  |
| rs10474483 | chr5 | 75,970,541 | 551 | 319 | 52  | 606 | 282 | 44  | 0.832 | 2.40E-02 | 1.62E+00 |  |  |
| rs2455232  | chr5 | 75,970,844 | 180 | 443 | 299 | 177 | 461 | 294 | 0.993 | 9.40E-01 | 2.69E-02 |  |  |
| rs3797418  | chr5 | 75,971,170 | 98  | 386 | 438 | 93  | 397 | 442 | 1.01  | 8.80E-01 | 5.55E-02 |  |  |
| rs17748939 | chr5 | 75,973,939 | 2   | 51  | 869 | 1   | 54  | 877 | 0.993 | 9.50E-01 | 2.23E-02 |  |  |
| rs2455236  | chr5 | 75,977,734 | 110 | 393 | 419 | 134 | 410 | 388 | 0.871 | 4.90E-02 | 1.31E+00 |  |  |
| rs458059   | chr5 | 75,978,692 | 253 | 426 | 208 | 232 | 449 | 209 | 1.05  | 4.80E-01 | 3.19E-01 |  |  |
| rs2059222  | chr5 | 75,978,912 | 72  | 360 | 488 | 63  | 323 | 543 | 1.18  | 2.70E-02 | 1.57E+00 |  |  |
| rs615951   | chr5 | 75,980,539 | 155 | 442 | 325 | 156 | 438 | 338 | 1.02  | 7.60E-01 | 1.19E-01 |  |  |
| rs12697857 | chr5 | 75,983,374 | 56  | 327 | 538 | 78  | 355 | 499 | 0.828 | 1.40E-02 | 1.85E+00 |  |  |
| rs2431363  | chr5 | 75,984,406 | 162 | 437 | 323 | 178 | 449 | 305 | 0.924 | 2.50E-01 | 6.02E-01 |  |  |
| rs2431361  | chr5 | 75,984,799 | 324 | 436 | 162 | 305 | 450 | 177 | 1.08  | 2.50E-01 | 6.02E-01 |  |  |
| rs3815774  | chr5 | 75,985,978 | 769 | 141 | 7   | 797 | 124 | 6   | 0.858 | 2.30E-01 | 6.38E-01 |  |  |
| rs2455217  | chr5 | 75,988,521 | 399 | 393 | 97  | 385 | 387 | 124 | 1.11  | 1.40E-01 | 8.54E-01 |  |  |
| rs17681722 | chr5 | 75,989,785 | 3   | 34  | 885 | 0   | 41  | 891 | 0.986 | 9.60E-01 | 1.77E-02 |  |  |
| rs2287930  | chr5 | 75,989,852 | 256 | 453 | 213 | 235 | 460 | 237 | 1.1   | 1.50E-01 | 8.24E-01 |  |  |
| rs3797437  | chr5 | 75,991,706 | 115 | 396 | 406 | 110 | 406 | 414 | 1.02  | 7.90E-01 | 1.02E-01 |  |  |
| rs1038920  | chr5 | 75,993,380 | 84  | 398 | 440 | 114 | 405 | 413 | 0.861 | 3.70E-02 | 1.43E+00 |  |  |
| rs7734540  | chr5 | 75,995,877 | 193 | 454 | 275 | 169 | 440 | 323 | 1.17  | 2.10E-02 | 1.68E+00 |  |  |
| rs253093   | chr5 | 75,996,621 | 0   | 9   | 913 | 0   | 8   | 924 | 1.14  | 9.80E-01 | 8.77E-03 |  |  |
| rs4704350  | chr5 | 75,998,142 | 11  | 167 | 744 | 8   | 171 | 753 | 1.02  | 8.70E-01 | 6.05E-02 |  |  |
| rs253096   | chr5 | 75,998,183 | 549 | 329 | 43  | 589 | 299 | 44  | 0.901 | 2.10E-01 | 6.78E-01 |  |  |
| rs17568154 | chr5 | 75,998,966 | 628 | 267 | 27  | 679 | 229 | 24  | 0.828 | 3.90E-02 | 1.41E+00 |  |  |
| rs3764935  | chr5 | 76,000,458 | 86  | 424 | 412 | 95  | 380 | 457 | 1.08  | 2.70E-01 | 5.69E-01 |  |  |
| rs7734335  | chr5 | 76,002,988 | 332 | 452 | 137 | 303 | 453 | 175 | 1.17  | 2.40E-02 | 1.62E+00 |  |  |
| rs17652917 | chr5 | 76,003,855 | 93  | 399 | 430 | 119 | 425 | 388 | 0.842 | 1.50E-02 | 1.82E+00 |  |  |



|            |      |            |     |     |     |     |     |     |       |          |          |  |  |
|------------|------|------------|-----|-----|-----|-----|-----|-----|-------|----------|----------|--|--|
| rs4704352  | chr5 | 76,004,274 | 534 | 336 | 52  | 572 | 311 | 49  | 0.897 | 1.80E-01 | 7.45E-01 |  |  |
| rs2287933  | chr5 | 76,005,975 | 785 | 134 | 3   | 795 | 129 | 7   | 1.01  | 9.70E-01 | 1.32E-02 |  |  |
| rs2303162  | chr5 | 76,008,707 | 30  | 303 | 589 | 40  | 306 | 586 | 0.939 | 4.60E-01 | 3.37E-01 |  |  |
| rs17568237 | chr5 | 76,009,201 | 5   | 100 | 817 | 5   | 87  | 840 | 1.16  | 3.50E-01 | 4.56E-01 |  |  |
| rs11741978 | chr5 | 76,009,875 | 19  | 231 | 672 | 14  | 188 | 730 | 1.3   | 7.80E-03 | 2.11E+00 |  |  |
| rs10805907 | chr5 | 76,018,426 | 82  | 376 | 464 | 58  | 375 | 499 | 1.16  | 5.00E-02 | 1.30E+00 |  |  |
| rs11951337 | chr5 | 76,021,722 | 34  | 254 | 634 | 16  | 248 | 668 | 1.2   | 4.90E-02 | 1.31E+00 |  |  |
| rs7708326  | chr5 | 76,022,337 | 558 | 310 | 50  | 608 | 284 | 32  | 0.807 | 9.70E-03 | 2.01E+00 |  |  |
| rs6884442  | chr5 | 76,024,190 | 560 | 328 | 33  | 545 | 340 | 47  | 1.12  | 1.80E-01 | 7.45E-01 |  |  |
| rs4704356  | chr5 | 76,029,331 | 106 | 429 | 386 | 116 | 453 | 363 | 0.919 | 2.30E-01 | 6.38E-01 |  |  |
| rs468648   | chr5 | 76,032,621 | 781 | 129 | 12  | 782 | 138 | 12  | 1.05  | 7.10E-01 | 1.49E-01 |  |  |
| rs10063791 | chr5 | 76,032,969 | 386 | 430 | 106 | 363 | 452 | 116 | 1.09  | 2.40E-01 | 6.20E-01 |  |  |
| rs7723344  | chr5 | 76,039,770 | 92  | 445 | 385 | 103 | 441 | 388 | 0.974 | 7.30E-01 | 1.37E-01 |  |  |
| rs153317   | chr5 | 76,040,002 | 316 | 457 | 149 | 311 | 462 | 159 | 1.04  | 6.00E-01 | 2.22E-01 |  |  |
| rs7728560  | chr5 | 76,040,689 | 24  | 200 | 698 | 16  | 174 | 742 | 1.25  | 2.90E-02 | 1.54E+00 |  |  |
| rs27951    | chr5 | 76,041,077 | 73  | 362 | 487 | 92  | 391 | 449 | 0.852 | 3.00E-02 | 1.52E+00 |  |  |
| rs2227744  | chr5 | 76,046,105 | 212 | 435 | 275 | 212 | 448 | 272 | 0.992 | 9.30E-01 | 3.15E-02 |  |  |
| rs32934    | chr5 | 76,046,462 | 11  | 102 | 809 | 11  | 110 | 811 | 0.946 | 7.20E-01 | 1.43E-01 |  |  |
| rs27593    | chr5 | 76,048,669 | 511 | 336 | 74  | 546 | 341 | 45  | 0.844 | 2.90E-02 | 1.54E+00 |  |  |
| rs37244    | chr5 | 76,050,867 | 508 | 340 | 74  | 545 | 342 | 45  | 0.838 | 2.30E-02 | 1.64E+00 |  |  |
| rs37248    | chr5 | 76,052,702 | 458 | 372 | 92  | 478 | 380 | 74  | 0.916 | 2.40E-01 | 6.20E-01 |  |  |
| rs37249    | chr5 | 76,052,731 | 296 | 441 | 185 | 292 | 456 | 184 | 1.01  | 9.20E-01 | 3.62E-02 |  |  |
| rs37250    | chr5 | 76,055,072 | 163 | 437 | 322 | 163 | 457 | 312 | 0.974 | 7.20E-01 | 1.43E-01 |  |  |
| rs153311   | chr5 | 76,063,579 | 68  | 320 | 534 | 49  | 332 | 551 | 1.1   | 2.50E-01 | 6.02E-01 |  |  |
| rs2227800  | chr5 | 76,065,128 | 914 | 8   | 0   | 924 | 8   | 0   | 0.989 | 8.20E-01 | 8.62E-02 |  |  |
| rs250736   | chr5 | 76,070,111 | 40  | 249 | 633 | 37  | 244 | 651 | 1.06  | 5.60E-01 | 2.52E-01 |  |  |
| rs11954573 | chr5 | 76,070,823 | 67  | 352 | 500 | 64  | 373 | 495 | 0.978 | 7.90E-01 | 1.02E-01 |  |  |
| rs250744   | chr5 | 76,077,666 | 143 | 432 | 347 | 142 | 452 | 338 | 0.977 | 7.60E-01 | 1.19E-01 |  |  |
| rs168752   | chr5 | 76,082,411 | 65  | 368 | 489 | 76  | 376 | 480 | 0.936 | 3.90E-01 | 4.09E-01 |  |  |
| rs250723   | chr5 | 76,091,810 | 209 | 442 | 271 | 193 | 452 | 287 | 1.07  | 3.20E-01 | 4.95E-01 |  |  |
| rs2047076  | chr5 | 76,094,265 | 25  | 258 | 613 | 34  | 286 | 591 | 0.861 | 8.90E-02 | 1.05E+00 |  |  |
| rs250724   | chr5 | 76,097,012 | 225 | 448 | 249 | 211 | 464 | 257 | 1.05  | 5.00E-01 | 3.01E-01 |  |  |
| rs250760   | chr5 | 76,103,380 | 136 | 427 | 356 | 145 | 440 | 343 | 0.947 | 4.40E-01 | 3.57E-01 |  |  |
| rs250763   | chr5 | 76,122,353 | 46  | 278 | 598 | 35  | 291 | 606 | 1.05  | 6.20E-01 | 2.08E-01 |  |  |
| rs463466   | chr5 | 76,127,981 | 378 | 406 | 136 | 375 | 436 | 120 | 0.977 | 7.60E-01 | 1.19E-01 |  |  |
| rs615986   | chr5 | 76,128,963 | 135 | 408 | 379 | 119 | 437 | 374 | 1.02  | 7.90E-01 | 1.02E-01 |  |  |
| rs636150   | chr5 | 76,129,070 | 44  | 293 | 584 | 39  | 274 | 618 | 1.12  | 1.90E-01 | 7.21E-01 |  |  |
| rs458591   | chr5 | 76,129,130 | 173 | 441 | 308 | 159 | 443 | 329 | 1.08  | 2.80E-01 | 5.53E-01 |  |  |
| rs1030484  | chr5 | 76,135,668 | 154 | 449 | 318 | 166 | 457 | 307 | 0.947 | 4.30E-01 | 3.67E-01 |  |  |
| rs13177258 | chr5 | 76,136,292 | 322 | 451 | 147 | 313 | 449 | 166 | 1.07  | 3.40E-01 | 4.69E-01 |  |  |
| rs6453251  | chr5 | 76,142,908 | 225 | 472 | 225 | 212 | 456 | 264 | 1.12  | 9.60E-02 | 1.02E+00 |  |  |
| rs639342   | chr5 | 76,148,625 | 24  | 252 | 646 | 26  | 218 | 688 | 1.15  | 1.40E-01 | 8.54E-01 |  |  |
| rs2242993  | chr5 | 76,151,277 | 74  | 404 | 444 | 110 | 397 | 425 | 0.863 | 4.10E-02 | 1.39E+00 |  |  |
| rs4704366  | chr5 | 76,172,978 | 637 | 257 | 28  | 634 | 282 | 16  | 0.991 | 9.50E-01 | 2.23E-02 |  |  |
| rs6883291  | chr5 | 76,176,093 | 476 | 371 | 75  | 461 | 390 | 81  | 1.07  | 3.80E-01 | 4.20E-01 |  |  |
| rs7724915  | chr5 | 76,177,435 | 806 | 109 | 7   | 833 | 95  | 4   | 0.818 | 1.70E-01 | 7.70E-01 |  |  |
| rs2460498  | chr5 | 76,177,535 | 44  | 318 | 555 | 42  | 322 | 564 | 1.02  | 8.80E-01 | 5.55E-02 |  |  |
| rs7729082  | chr5 | 76,177,776 | 561 | 327 | 34  | 538 | 341 | 53  | 1.16  | 6.90E-02 | 1.16E+00 |  |  |
| rs2460506  | chr5 | 76,182,990 | 127 | 432 | 363 | 158 | 460 | 314 | 0.831 | 6.40E-03 | 2.19E+00 |  |  |
| rs2460508  | chr5 | 76,192,137 | 299 | 447 | 176 | 255 | 483 | 194 | 1.15  | 4.10E-02 | 1.39E+00 |  |  |
| rs2359425  | chr5 | 76,193,792 | 3   | 68  | 851 | 2   | 61  | 869 | 1.16  | 4.50E-01 | 3.47E-01 |  |  |
| rs7712142  | chr5 | 76,196,125 | 38  | 289 | 591 | 26  | 281 | 618 | 1.13  | 1.60E-01 | 7.96E-01 |  |  |
| rs6453259  | chr5 | 76,201,774 | 154 | 463 | 305 | 152 | 452 | 328 | 1.05  | 4.60E-01 | 3.37E-01 |  |  |
| rs10462548 | chr5 | 76,205,711 | 120 | 419 | 382 | 142 | 424 | 365 | 0.908 | 1.70E-01 | 7.70E-01 |  |  |
| rs13188087 | chr5 | 76,209,478 | 801 | 118 | 3   | 816 | 112 | 4   | 0.954 | 7.70E-01 | 1.14E-01 |  |  |
| rs1320306  | chr5 | 76,210,275 | 93  | 394 | 434 | 125 | 397 | 410 | 0.864 | 4.00E-02 | 1.40E+00 |  |  |
| rs12519617 | chr5 | 76,211,213 | 91  | 397 | 434 | 124 | 398 | 410 | 0.863 | 3.80E-02 | 1.42E+00 |  |  |
| rs7722773  | chr5 | 76,223,064 | 408 | 407 | 100 | 390 | 395 | 144 | 1.17  | 2.40E-02 | 1.62E+00 |  |  |
| rs17749734 | chr5 | 76,223,533 | 0   | 2   | 919 | 0   | 1   | 928 | 2.02  | 6.20E-01 | 2.08E-01 |  |  |
| rs10942800 | chr5 | 76,255,728 | 96  | 423 | 403 | 140 | 407 | 385 | 0.857 | 2.80E-02 | 1.55E+00 |  |  |
| rs987951   | chr5 | 76,256,954 | 73  | 355 | 494 | 76  | 415 | 441 | 0.853 | 3.20E-02 | 1.49E+00 |  |  |
| rs8180518  | chr5 | 76,258,503 | 365 | 445 | 112 | 369 | 435 | 128 | 1.03  | 6.40E-01 | 1.94E-01 |  |  |
| rs2434651  | chr5 | 76,259,121 | 70  | 374 | 478 | 83  | 389 | 460 | 0.912 | 2.10E-01 | 6.78E-01 |  |  |
| rs1110413  | chr5 | 76,259,612 | 21  | 233 | 668 | 21  | 253 | 658 | 0.932 | 4.70E-01 | 3.28E-01 |  |  |
| rs1715762  | chr5 | 76,260,909 | 603 | 288 | 31  | 588 | 314 | 30  | 1.07  | 4.30E-01 | 3.67E-01 |  |  |
| rs1613519  | chr5 | 76,261,811 | 213 | 430 | 279 | 186 | 466 | 280 | 1.06  | 3.90E-01 | 4.09E-01 |  |  |
| rs11747190 | chr5 | 76,266,949 | 10  | 180 | 732 | 6   | 197 | 729 | 0.963 | 7.60E-01 | 1.19E-01 |  |  |
| rs10942804 | chr5 | 76,267,803 | 781 | 137 | 4   | 787 | 142 | 3   | 1.01  | 9.80E-01 | 8.77E-03 |  |  |
| rs1700687  | chr5 | 76,268,760 | 256 | 443 | 222 | 235 | 457 | 234 | 1.07  | 2.90E-01 | 5.38E-01 |  |  |
| rs1700686  | chr5 | 76,268,926 | 51  | 309 | 556 | 52  | 345 | 531 | 0.906 | 2.20E-01 | 6.58E-01 |  |  |

|            |      |            |     |     |     |     |     |     |       |          |          |  |  |
|------------|------|------------|-----|-----|-----|-----|-----|-----|-------|----------|----------|--|--|
| rs2055627  | chr5 | 76,270,400 | 10  | 171 | 737 | 10  | 196 | 724 | 0.884 | 2.60E-01 | 5.85E-01 |  |  |
| rs1700680  | chr5 | 76,274,234 | 101 | 404 | 416 | 124 | 422 | 386 | 0.874 | 5.50E-02 | 1.26E+00 |  |  |
| rs3792738  | chr5 | 76,283,540 | 5   | 121 | 792 | 3   | 102 | 823 | 1.24  | 1.20E-01 | 9.21E-01 |  |  |
| rs32897    | chr5 | 76,286,728 | 667 | 235 | 20  | 638 | 262 | 31  | 1.2   | 4.40E-02 | 1.36E+00 |  |  |
| rs7728378  | chr5 | 76,295,106 | 379 | 415 | 128 | 339 | 457 | 136 | 1.12  | 9.40E-02 | 1.03E+00 |  |  |
| rs10062367 | chr5 | 76,300,110 | 34  | 260 | 628 | 41  | 299 | 592 | 0.842 | 4.40E-02 | 1.36E+00 |  |  |
| rs1875999  | chr5 | 76,300,738 | 430 | 391 | 99  | 413 | 413 | 105 | 1.07  | 3.70E-01 | 4.32E-01 |  |  |
| rs10514082 | chr5 | 76,302,203 | 689 | 210 | 23  | 661 | 246 | 25  | 1.17  | 9.70E-02 | 1.01E+00 |  |  |
| rs10474485 | chr5 | 76,306,609 | 31  | 269 | 616 | 21  | 283 | 621 | 1.03  | 7.20E-01 | 1.43E-01 |  |  |
| rs7704995  | chr5 | 76,310,293 | 430 | 396 | 96  | 420 | 413 | 99  | 1.04  | 5.90E-01 | 2.29E-01 |  |  |
| rs1651094  | chr5 | 76,328,399 | 525 | 339 | 57  | 528 | 341 | 60  | 1.01  | 9.10E-01 | 4.10E-02 |  |  |
| rs10066702 | chr5 | 76,332,166 | 165 | 459 | 298 | 164 | 453 | 315 | 1.04  | 6.10E-01 | 2.15E-01 |  |  |
| rs173545   | chr5 | 76,332,563 | 42  | 268 | 612 | 20  | 313 | 599 | 1.01  | 9.40E-01 | 2.69E-02 |  |  |
| rs247746   | chr5 | 76,334,528 | 113 | 426 | 383 | 110 | 442 | 380 | 0.993 | 9.50E-01 | 2.23E-02 |  |  |
| rs6898403  | chr5 | 76,339,154 | 369 | 438 | 115 | 367 | 449 | 116 | 1.01  | 8.70E-01 | 6.05E-02 |  |  |
| rs1035887  | chr5 | 76,339,455 | 1   | 62  | 859 | 4   | 67  | 860 | 0.857 | 4.20E-01 | 3.77E-01 |  |  |
| rs10473985 | chr5 | 76,340,812 | 8   | 131 | 783 | 10  | 144 | 778 | 0.898 | 4.00E-01 | 3.98E-01 |  |  |
| rs32902    | chr5 | 76,344,668 | 282 | 441 | 197 | 255 | 480 | 192 | 1.05  | 4.80E-01 | 3.19E-01 |  |  |
| rs12653511 | chr5 | 76,346,536 | 363 | 441 | 113 | 384 | 429 | 114 | 0.96  | 5.80E-01 | 2.37E-01 |  |  |
| rs13178007 | chr5 | 76,347,247 | 337 | 432 | 153 | 315 | 468 | 149 | 1.05  | 5.30E-01 | 2.76E-01 |  |  |
| rs6865782  | chr5 | 76,347,874 | 551 | 308 | 62  | 531 | 351 | 50  | 1.04  | 6.20E-01 | 2.08E-01 |  |  |
| rs17750118 | chr5 | 76,348,021 | 433 | 396 | 93  | 471 | 384 | 77  | 0.88  | 7.90E-02 | 1.10E+00 |  |  |
| rs247748   | chr5 | 76,349,662 | 182 | 407 | 333 | 167 | 495 | 270 | 0.897 | 1.10E-01 | 9.59E-01 |  |  |
| rs4704382  | chr5 | 76,353,962 | 0   | 2   | 920 | 0   | 1   | 931 | 2.02  | 6.20E-01 | 2.08E-01 |  |  |
| rs247753   | chr5 | 76,355,650 | 49  | 292 | 581 | 43  | 317 | 572 | 0.972 | 7.60E-01 | 1.19E-01 |  |  |
| rs3762982  | chr5 | 76,359,244 | 444 | 378 | 100 | 465 | 390 | 77  | 0.903 | 1.60E-01 | 7.96E-01 |  |  |
| rs995743   | chr5 | 76,378,585 | 379 | 412 | 131 | 348 | 453 | 131 | 1.08  | 2.70E-01 | 5.69E-01 |  |  |
| rs10072933 | chr5 | 76,383,219 | 600 | 284 | 38  | 574 | 324 | 33  | 1.09  | 3.00E-01 | 5.23E-01 |  |  |
| rs2545     | chr5 | 76,396,572 | 102 | 395 | 425 | 112 | 424 | 394 | 0.9   | 1.40E-01 | 8.54E-01 |  |  |
| rs1048834  | chr5 | 76,405,093 | 729 | 180 | 13  | 750 | 176 | 6   | 0.892 | 3.10E-01 | 5.09E-01 |  |  |
| rs1001960  | chr5 | 76,406,875 | 12  | 190 | 720 | 14  | 211 | 707 | 0.893 | 2.80E-01 | 5.53E-01 |  |  |
| rs2914143  | chr5 | 76,415,756 | 38  | 330 | 554 | 40  | 336 | 556 | 0.983 | 8.60E-01 | 6.55E-02 |  |  |
| rs10942811 | chr5 | 76,424,037 | 71  | 343 | 508 | 77  | 368 | 487 | 0.917 | 2.60E-01 | 5.85E-01 |  |  |
| rs6882793  | chr5 | 76,434,547 | 362 | 410 | 150 | 315 | 443 | 174 | 1.18  | 1.60E-02 | 1.80E+00 |  |  |
| rs13358038 | chr5 | 76,439,807 | 80  | 347 | 495 | 92  | 374 | 466 | 0.888 | 1.10E-01 | 9.59E-01 |  |  |
| rs3857395  | chr5 | 76,442,207 | 361 | 414 | 147 | 316 | 441 | 175 | 1.18  | 1.30E-02 | 1.89E+00 |  |  |
| rs4703727  | chr5 | 76,443,333 | 493 | 347 | 79  | 465 | 372 | 94  | 1.14  | 8.70E-02 | 1.06E+00 |  |  |
| rs12188833 | chr5 | 76,443,799 | 7   | 184 | 724 | 13  | 192 | 712 | 0.899 | 3.30E-01 | 4.81E-01 |  |  |
| rs7702095  | chr5 | 76,450,368 | 78  | 351 | 493 | 91  | 386 | 455 | 0.865 | 5.00E-02 | 1.30E+00 |  |  |
| rs6453278  | chr5 | 76,452,798 | 448 | 378 | 96  | 410 | 410 | 112 | 1.15  | 4.80E-02 | 1.32E+00 |  |  |
| rs12519589 | chr5 | 76,453,974 | 13  | 209 | 700 | 11  | 216 | 705 | 0.998 | 9.80E-01 | 8.77E-03 |  |  |
| rs10070420 | chr5 | 76,454,850 | 7   | 146 | 766 | 6   | 148 | 778 | 1.02  | 9.40E-01 | 2.69E-02 |  |  |
| rs4128741  | chr5 | 76,459,723 | 136 | 413 | 373 | 124 | 434 | 374 | 1.02  | 7.50E-01 | 1.25E-01 |  |  |
| rs7708285  | chr5 | 76,461,623 | 438 | 376 | 91  | 443 | 385 | 92  | 1     | 9.80E-01 | 8.77E-03 |  |  |
| rs12521058 | chr5 | 76,462,743 | 139 | 412 | 370 | 140 | 440 | 352 | 0.952 | 4.90E-01 | 3.10E-01 |  |  |
| rs6880285  | chr5 | 76,464,235 | 716 | 197 | 9   | 750 | 171 | 11  | 0.875 | 2.20E-01 | 6.58E-01 |  |  |
| rs10052560 | chr5 | 76,466,058 | 139 | 412 | 371 | 140 | 443 | 349 | 0.944 | 4.10E-01 | 3.87E-01 |  |  |
| rs7732628  | chr5 | 76,471,102 | 292 | 445 | 185 | 303 | 444 | 183 | 0.974 | 7.20E-01 | 1.43E-01 |  |  |
| rs6885904  | chr5 | 76,475,006 | 289 | 446 | 187 | 290 | 453 | 189 | 1     | 9.70E-01 | 1.32E-02 |  |  |
| rs9293707  | chr5 | 76,475,423 | 171 | 424 | 327 | 162 | 450 | 319 | 0.999 | 9.90E-01 | 4.36E-03 |  |  |
| rs3924674  | chr5 | 76,476,752 | 3   | 99  | 806 | 3   | 114 | 800 | 0.877 | 3.70E-01 | 4.32E-01 |  |  |
| rs6453285  | chr5 | 76,481,305 | 8   | 182 | 731 | 7   | 174 | 750 | 1.07  | 5.50E-01 | 2.60E-01 |  |  |
| rs12189028 | chr5 | 76,482,604 | 6   | 134 | 782 | 3   | 125 | 804 | 1.14  | 3.30E-01 | 4.81E-01 |  |  |
| rs7708818  | chr5 | 76,484,040 | 1   | 100 | 821 | 3   | 111 | 818 | 0.874 | 3.70E-01 | 4.32E-01 |  |  |
| rs6864250  | chr5 | 76,485,946 | 183 | 433 | 306 | 160 | 460 | 312 | 1.06  | 3.80E-01 | 4.20E-01 |  |  |
| rs9293710  | chr5 | 76,486,642 | 180 | 414 | 327 | 166 | 443 | 320 | 1.01  | 8.80E-01 | 5.55E-02 |  |  |
| rs6866080  | chr5 | 76,487,276 | 139 | 415 | 367 | 122 | 415 | 395 | 1.1   | 1.60E-01 | 7.96E-01 |  |  |
| rs6862414  | chr5 | 76,490,315 | 471 | 368 | 81  | 490 | 366 | 76  | 0.951 | 5.20E-01 | 2.84E-01 |  |  |
| rs4426900  | chr5 | 76,496,556 | 118 | 425 | 379 | 96  | 465 | 371 | 1.03  | 7.30E-01 | 1.37E-01 |  |  |
| rs7721952  | chr5 | 76,499,316 | 6   | 124 | 792 | 1   | 144 | 787 | 0.937 | 6.40E-01 | 1.94E-01 |  |  |
| rs1479561  | chr5 | 76,503,740 | 22  | 226 | 674 | 22  | 241 | 669 | 0.95  | 6.10E-01 | 2.15E-01 |  |  |
| rs2972341  | chr5 | 76,504,599 | 209 | 461 | 252 | 208 | 455 | 269 | 1.04  | 5.90E-01 | 2.29E-01 |  |  |
| rs16874057 | chr5 | 76,504,862 | 3   | 84  | 835 | 3   | 84  | 845 | 1.01  | 1.00E+00 | 0.00E+00 |  |  |
| rs963913   | chr5 | 76,506,179 | 180 | 443 | 299 | 175 | 476 | 281 | 0.969 | 6.60E-01 | 1.80E-01 |  |  |
| rs6453292  | chr5 | 76,516,517 | 292 | 438 | 185 | 284 | 461 | 183 | 1.02  | 8.30E-01 | 8.09E-02 |  |  |
| rs1479558  | chr5 | 76,518,410 | 605 | 271 | 39  | 605 | 297 | 28  | 0.994 | 9.80E-01 | 8.77E-03 |  |  |
| rs1119208  | chr5 | 76,524,369 | 117 | 408 | 397 | 108 | 442 | 382 | 0.979 | 7.80E-01 | 1.08E-01 |  |  |
| rs10462550 | chr5 | 76,531,908 | 9   | 163 | 750 | 9   | 157 | 765 | 1.05  | 7.10E-01 | 1.49E-01 |  |  |
| rs974280   | chr5 | 76,535,005 | 354 | 433 | 135 | 344 | 457 | 131 | 1.02  | 8.00E-01 | 9.69E-02 |  |  |
| rs9687206  | chr5 | 76,551,580 | 307 | 430 | 185 | 302 | 473 | 157 | 0.954 | 4.90E-01 | 3.10E-01 |  |  |

|            |      |            |     |     |     |     |     |     |       |          |          |  |  |
|------------|------|------------|-----|-----|-----|-----|-----|-----|-------|----------|----------|--|--|
| rs12520862 | chr5 | 76,556,268 | 13  | 205 | 704 | 18  | 205 | 709 | 0.964 | 7.50E-01 | 1.25E-01 |  |  |
| rs12516568 | chr5 | 76,557,177 | 13  | 205 | 703 | 18  | 204 | 708 | 0.968 | 7.80E-01 | 1.08E-01 |  |  |
| rs1382879  | chr5 | 76,557,624 | 339 | 444 | 139 | 351 | 452 | 129 | 0.956 | 5.30E-01 | 2.76E-01 |  |  |
| rs2046045  | chr5 | 76,571,567 | 337 | 442 | 143 | 349 | 454 | 129 | 0.947 | 4.40E-01 | 3.57E-01 |  |  |
| rs12515498 | chr5 | 76,575,728 | 517 | 343 | 58  | 544 | 327 | 59  | 0.943 | 4.70E-01 | 3.28E-01 |  |  |
| rs1351283  | chr5 | 76,580,698 | 376 | 424 | 122 | 399 | 424 | 109 | 0.925 | 2.70E-01 | 5.69E-01 |  |  |
| rs989758   | chr5 | 76,580,716 | 122 | 421 | 378 | 109 | 424 | 399 | 1.08  | 3.10E-01 | 5.09E-01 |  |  |
| rs1096752  | chr5 | 76,585,314 | 200 | 462 | 260 | 206 | 487 | 239 | 0.942 | 3.80E-01 | 4.20E-01 |  |  |
| rs4703730  | chr5 | 76,585,444 | 225 | 482 | 214 | 231 | 476 | 220 | 1     | 9.80E-01 | 8.77E-03 |  |  |
| rs832785   | chr5 | 76,586,085 | 353 | 439 | 129 | 327 | 472 | 132 | 1.07  | 3.10E-01 | 5.09E-01 |  |  |
| rs4704400  | chr5 | 76,586,766 | 209 | 486 | 226 | 220 | 479 | 233 | 0.991 | 9.20E-01 | 3.62E-02 |  |  |
| rs7702192  | chr5 | 76,590,563 | 181 | 464 | 277 | 184 | 459 | 289 | 1.02  | 8.20E-01 | 8.62E-02 |  |  |
| rs2859576  | chr5 | 76,592,073 | 723 | 189 | 10  | 758 | 166 | 8   | 0.846 | 1.30E-01 | 8.86E-01 |  |  |
| rs7714529  | chr5 | 76,598,001 | 72  | 416 | 434 | 93  | 387 | 452 | 0.983 | 8.30E-01 | 8.09E-02 |  |  |
| rs16874127 | chr5 | 76,599,527 | 813 | 105 | 4   | 820 | 106 | 6   | 1.04  | 8.50E-01 | 7.06E-02 |  |  |
| rs832790   | chr5 | 76,604,048 | 152 | 435 | 334 | 138 | 424 | 369 | 1.11  | 1.20E-01 | 9.21E-01 |  |  |
| rs6885813  | chr5 | 76,605,367 | 65  | 328 | 518 | 42  | 350 | 531 | 1.09  | 2.70E-01 | 5.69E-01 |  |  |
| rs13361710 | chr5 | 76,606,098 | 58  | 326 | 535 | 41  | 353 | 537 | 1.04  | 6.50E-01 | 1.87E-01 |  |  |
| rs251421   | chr5 | 76,608,726 | 517 | 345 | 58  | 514 | 358 | 60  | 1.03  | 7.10E-01 | 1.49E-01 |  |  |
| rs251416   | chr5 | 76,614,391 | 44  | 337 | 541 | 54  | 335 | 543 | 0.961 | 6.30E-01 | 2.01E-01 |  |  |
| rs251411   | chr5 | 76,623,912 | 43  | 335 | 544 | 54  | 331 | 547 | 0.96  | 6.30E-01 | 2.01E-01 |  |  |
| rs12514694 | chr5 | 76,627,454 | 9   | 203 | 710 | 11  | 196 | 725 | 1.03  | 8.20E-01 | 8.62E-02 |  |  |
| rs844274   | chr5 | 76,628,500 | 43  | 335 | 544 | 54  | 331 | 547 | 0.96  | 6.30E-01 | 2.01E-01 |  |  |
| rs10066802 | chr5 | 76,633,217 | 119 | 403 | 400 | 99  | 427 | 406 | 1.06  | 4.50E-01 | 3.47E-01 |  |  |
| rs10045589 | chr5 | 76,649,815 | 464 | 395 | 63  | 456 | 406 | 70  | 1.05  | 5.10E-01 | 2.92E-01 |  |  |
| rs10474494 | chr5 | 76,650,146 | 79  | 415 | 428 | 87  | 419 | 426 | 0.966 | 6.50E-01 | 1.87E-01 |  |  |
| rs6863296  | chr5 | 76,652,494 | 805 | 114 | 3   | 814 | 114 | 4   | 1.01  | 9.80E-01 | 8.77E-03 |  |  |
| rs1531615  | chr5 | 76,654,613 | 179 | 462 | 281 | 170 | 468 | 294 | 1.05  | 5.10E-01 | 2.92E-01 |  |  |
| rs6873924  | chr5 | 76,656,338 | 0   | 65  | 857 | 0   | 72  | 860 | 0.909 | 6.50E-01 | 1.87E-01 |  |  |
| rs3797462  | chr5 | 76,657,430 | 61  | 394 | 467 | 67  | 405 | 460 | 0.955 | 5.50E-01 | 2.60E-01 |  |  |
| rs9686502  | chr5 | 76,659,177 | 242 | 467 | 213 | 251 | 474 | 207 | 0.969 | 6.50E-01 | 1.87E-01 |  |  |
| rs9687030  | chr5 | 76,663,192 | 306 | 446 | 170 | 282 | 491 | 159 | 1.03  | 6.60E-01 | 1.80E-01 |  |  |
| rs7703993  | chr5 | 76,669,108 | 615 | 281 | 26  | 615 | 292 | 25  | 1.02  | 8.50E-01 | 7.06E-02 |  |  |
| rs11949597 | chr5 | 76,680,266 | 2   | 88  | 832 | 1   | 89  | 842 | 1.02  | 9.40E-01 | 2.69E-02 |  |  |
| rs2046046  | chr5 | 76,680,718 | 439 | 395 | 83  | 439 | 399 | 87  | 1.02  | 8.30E-01 | 8.09E-02 |  |  |
| rs2306344  | chr5 | 76,681,558 | 75  | 396 | 451 | 73  | 415 | 444 | 0.977 | 7.70E-01 | 1.14E-01 |  |  |
| rs7723920  | chr5 | 76,687,906 | 279 | 475 | 168 | 287 | 462 | 183 | 1.02  | 8.10E-01 | 9.15E-02 |  |  |
| rs17683162 | chr5 | 76,689,508 | 142 | 422 | 358 | 122 | 442 | 368 | 1.07  | 3.70E-01 | 4.32E-01 |  |  |
| rs4704416  | chr5 | 76,698,274 | 493 | 367 | 62  | 510 | 368 | 54  | 0.945 | 4.70E-01 | 3.28E-01 |  |  |
| rs10514096 | chr5 | 76,700,940 | 48  | 353 | 521 | 48  | 370 | 513 | 0.964 | 6.60E-01 | 1.80E-01 |  |  |
| rs6453304  | chr5 | 76,706,384 | 20  | 255 | 647 | 18  | 258 | 652 | 1.01  | 9.30E-01 | 3.15E-02 |  |  |
| rs7732963  | chr5 | 76,707,300 | 0   | 68  | 854 | 1   | 67  | 863 | 0.995 | 9.50E-01 | 2.23E-02 |  |  |
| rs7715119  | chr5 | 76,711,174 | 18  | 201 | 703 | 17  | 209 | 706 | 0.984 | 9.10E-01 | 4.10E-02 |  |  |
| rs2359874  | chr5 | 76,713,932 | 330 | 453 | 139 | 329 | 445 | 157 | 1.05  | 5.10E-01 | 2.92E-01 |  |  |
| rs335618   | chr5 | 76,721,372 | 300 | 484 | 138 | 309 | 471 | 152 | 1.02  | 8.50E-01 | 7.06E-02 |  |  |
| rs2359875  | chr5 | 76,731,296 | 557 | 314 | 50  | 579 | 313 | 39  | 0.917 | 2.90E-01 | 5.38E-01 |  |  |
| rs3733952  | chr5 | 76,732,090 | 33  | 286 | 603 | 29  | 278 | 625 | 1.07  | 4.30E-01 | 3.67E-01 |  |  |
| rs6874493  | chr5 | 76,737,495 | 193 | 477 | 252 | 196 | 488 | 248 | 0.984 | 8.30E-01 | 8.09E-02 |  |  |
| rs374003   | chr5 | 76,737,959 | 646 | 258 | 18  | 651 | 258 | 23  | 1.03  | 8.00E-01 | 9.69E-02 |  |  |
| rs7705337  | chr5 | 76,739,091 | 2   | 58  | 862 | 1   | 51  | 880 | 1.19  | 4.10E-01 | 3.87E-01 |  |  |
| rs3101866  | chr5 | 76,739,130 | 225 | 465 | 232 | 205 | 493 | 234 | 1.05  | 4.90E-01 | 3.10E-01 |  |  |
| rs2359876  | chr5 | 76,739,394 | 45  | 345 | 532 | 56  | 341 | 534 | 0.96  | 6.30E-01 | 2.01E-01 |  |  |
| rs11956168 | chr5 | 76,740,007 | 6   | 135 | 781 | 3   | 153 | 776 | 0.929 | 5.80E-01 | 2.37E-01 |  |  |
| rs10514098 | chr5 | 76,740,837 | 683 | 220 | 19  | 698 | 219 | 15  | 0.948 | 6.10E-01 | 2.15E-01 |  |  |
| rs9293713  | chr5 | 76,741,011 | 5   | 119 | 796 | 4   | 113 | 815 | 1.09  | 5.70E-01 | 2.44E-01 |  |  |
| rs335614   | chr5 | 76,744,743 | 132 | 433 | 357 | 141 | 424 | 367 | 0.997 | 9.90E-01 | 4.36E-03 |  |  |
| rs2279095  | chr5 | 76,745,182 | 9   | 146 | 767 | 5   | 148 | 779 | 1.05  | 6.90E-01 | 1.61E-01 |  |  |
| rs12521494 | chr5 | 76,747,918 | 562 | 321 | 39  | 563 | 327 | 42  | 1.02  | 7.90E-01 | 1.02E-01 |  |  |
| rs890717   | chr5 | 76,748,331 | 692 | 219 | 10  | 690 | 225 | 16  | 1.07  | 4.90E-01 | 3.10E-01 |  |  |
| rs2242159  | chr5 | 76,750,136 | 176 | 452 | 294 | 159 | 473 | 300 | 1.05  | 4.90E-01 | 3.10E-01 |  |  |
| rs2242160  | chr5 | 76,750,887 | 385 | 431 | 106 | 405 | 413 | 114 | 0.979 | 7.80E-01 | 1.08E-01 |  |  |
| rs335644   | chr5 | 76,752,669 | 183 | 480 | 259 | 201 | 464 | 267 | 0.977 | 7.50E-01 | 1.25E-01 |  |  |
| rs335643   | chr5 | 76,753,826 | 534 | 338 | 50  | 538 | 339 | 55  | 1.02  | 8.40E-01 | 7.57E-02 |  |  |
| rs335640   | chr5 | 76,756,000 | 77  | 397 | 448 | 89  | 403 | 439 | 0.94  | 4.00E-01 | 3.98E-01 |  |  |
| rs2359877  | chr5 | 76,756,293 | 2   | 128 | 792 | 6   | 136 | 790 | 0.894 | 4.00E-01 | 3.98E-01 |  |  |
| rs90682    | chr5 | 76,756,845 | 357 | 441 | 124 | 387 | 420 | 125 | 0.941 | 3.90E-01 | 4.09E-01 |  |  |
| rs3816609  | chr5 | 76,757,694 | 114 | 429 | 379 | 112 | 412 | 408 | 1.07  | 3.50E-01 | 4.56E-01 |  |  |
| rs335636   | chr5 | 76,760,355 | 203 | 472 | 247 | 222 | 445 | 265 | 0.997 | 9.90E-01 | 4.36E-03 |  |  |
| rs7447456  | chr5 | 76,761,958 | 624 | 248 | 34  | 632 | 268 | 18  | 0.939 | 5.10E-01 | 2.92E-01 |  |  |
| rs3149     | chr5 | 76,764,192 | 578 | 296 | 48  | 597 | 305 | 30  | 0.902 | 2.20E-01 | 6.58E-01 |  |  |

|            |      |            |     |     |     |     |     |     |       |          |          |  |  |
|------------|------|------------|-----|-----|-----|-----|-----|-----|-------|----------|----------|--|--|
| rs335630   | chr5 | 76,765,134 | 443 | 386 | 80  | 428 | 399 | 85  | 1.06  | 4.70E-01 | 3.28E-01 |  |  |
| rs4704421  | chr5 | 76,765,470 | 3   | 82  | 837 | 1   | 87  | 844 | 0.999 | 9.40E-01 | 2.69E-02 |  |  |
| rs335624   | chr5 | 76,766,692 | 233 | 473 | 216 | 251 | 449 | 232 | 0.996 | 9.80E-01 | 8.77E-03 |  |  |
| rs919224   | chr5 | 76,769,135 | 136 | 453 | 333 | 144 | 420 | 368 | 1.06  | 4.20E-01 | 3.77E-01 |  |  |
| rs33204    | chr5 | 76,769,840 | 188 | 477 | 256 | 206 | 441 | 284 | 1.02  | 7.90E-01 | 1.02E-01 |  |  |
| rs2242158  | chr5 | 76,770,300 | 895 | 27  | 0   | 908 | 23  | 1   | 0.915 | 8.60E-01 | 6.55E-02 |  |  |
| rs441102   | chr5 | 76,774,726 | 16  | 242 | 663 | 28  | 240 | 664 | 0.926 | 4.20E-01 | 3.77E-01 |  |  |
| rs463592   | chr5 | 76,790,456 | 800 | 117 | 5   | 794 | 135 | 3   | 1.11  | 4.60E-01 | 3.37E-01 |  |  |
| rs17751165 | chr5 | 76,792,067 | 17  | 207 | 688 | 15  | 203 | 698 | 1.04  | 6.90E-01 | 1.61E-01 |  |  |
| rs690280   | chr5 | 76,794,989 | 166 | 463 | 290 | 185 | 436 | 309 | 0.997 | 9.90E-01 | 4.36E-03 |  |  |
| rs3797644  | chr5 | 76,795,372 | 378 | 429 | 114 | 407 | 412 | 113 | 0.939 | 3.80E-01 | 4.20E-01 |  |  |
| rs251470   | chr5 | 76,814,241 | 179 | 463 | 280 | 195 | 438 | 299 | 1     | 9.80E-01 | 8.77E-03 |  |  |
| rs163035   | chr5 | 76,815,798 | 203 | 472 | 247 | 221 | 446 | 265 | 0.999 | 9.90E-01 | 4.36E-03 |  |  |
| rs163030   | chr5 | 76,817,227 | 202 | 473 | 247 | 221 | 446 | 265 | 0.997 | 9.90E-01 | 4.36E-03 |  |  |
| rs33198    | chr5 | 76,825,021 | 240 | 464 | 218 | 250 | 445 | 237 | 1.02  | 7.90E-01 | 1.02E-01 |  |  |
| rs2359879  | chr5 | 76,841,025 | 5   | 162 | 755 | 8   | 157 | 767 | 1.01  | 9.90E-01 | 4.36E-03 |  |  |
| rs10474516 | chr5 | 76,852,199 | 405 | 410 | 107 | 409 | 406 | 117 | 1.02  | 7.80E-01 | 1.08E-01 |  |  |
| rs1460042  | chr5 | 76,857,474 | 101 | 402 | 418 | 105 | 398 | 429 | 1.01  | 9.40E-01 | 2.69E-02 |  |  |
| rs6872745  | chr5 | 76,868,712 | 146 | 431 | 345 | 162 | 424 | 346 | 0.962 | 5.90E-01 | 2.29E-01 |  |  |
| rs3846672  | chr5 | 76,871,060 | 184 | 453 | 283 | 192 | 445 | 294 | 1     | 9.80E-01 | 8.77E-03 |  |  |
| rs3846673  | chr5 | 76,871,129 | 232 | 457 | 229 | 230 | 448 | 252 | 1.06  | 4.30E-01 | 3.67E-01 |  |  |
| rs7729096  | chr5 | 76,871,684 | 1   | 14  | 907 | 0   | 30  | 902 | 0.535 | 5.80E-02 | 1.24E+00 |  |  |
| rs10070168 | chr5 | 76,871,811 | 405 | 407 | 110 | 420 | 397 | 115 | 0.984 | 8.40E-01 | 7.57E-02 |  |  |
| rs7729808  | chr5 | 76,885,287 | 659 | 240 | 23  | 626 | 292 | 13  | 1.12  | 2.10E-01 | 6.78E-01 |  |  |
| rs10052921 | chr5 | 76,893,626 | 603 | 283 | 36  | 576 | 331 | 25  | 1.08  | 3.90E-01 | 4.09E-01 |  |  |
| rs10063453 | chr5 | 76,898,322 | 775 | 140 | 6   | 783 | 142 | 7   | 1.02  | 9.40E-01 | 2.69E-02 |  |  |
| rs12655063 | chr5 | 76,901,725 | 5   | 139 | 778 | 4   | 156 | 772 | 0.911 | 4.70E-01 | 3.28E-01 |  |  |
| rs12697868 | chr5 | 76,904,514 | 58  | 325 | 539 | 42  | 346 | 544 | 1.05  | 5.70E-01 | 2.44E-01 |  |  |
| rs6453323  | chr5 | 76,904,706 | 377 | 409 | 136 | 358 | 459 | 115 | 1     | 9.90E-01 | 4.36E-03 |  |  |
| rs6453330  | chr5 | 76,907,101 | 517 | 341 | 61  | 517 | 363 | 50  | 0.984 | 8.60E-01 | 6.55E-02 |  |  |
| rs4704434  | chr5 | 76,926,324 | 208 | 461 | 252 | 188 | 502 | 242 | 1.02  | 7.80E-01 | 1.08E-01 |  |  |
| rs7703420  | chr5 | 76,926,777 | 15  | 195 | 712 | 8   | 184 | 740 | 1.16  | 1.80E-01 | 7.45E-01 |  |  |
| rs4532348  | chr5 | 76,927,185 | 266 | 454 | 192 | 282 | 462 | 172 | 0.924 | 2.50E-01 | 6.02E-01 |  |  |
| rs10474519 | chr5 | 76,929,703 | 12  | 182 | 724 | 7   | 170 | 752 | 1.15  | 2.10E-01 | 6.78E-01 |  |  |
| rs4374746  | chr5 | 76,931,773 | 16  | 224 | 682 | 13  | 236 | 683 | 0.986 | 9.20E-01 | 3.62E-02 |  |  |
| rs3933483  | chr5 | 76,939,448 | 706 | 202 | 13  | 707 | 206 | 19  | 1.07  | 5.50E-01 | 2.60E-01 |  |  |
| rs6868555  | chr5 | 76,955,681 | 238 | 455 | 229 | 239 | 481 | 212 | 0.962 | 5.80E-01 | 2.37E-01 |  |  |
| rs2241367  | chr5 | 76,967,981 | 374 | 414 | 134 | 366 | 437 | 129 | 1.01  | 8.80E-01 | 5.55E-02 |  |  |
| rs11746588 | chr5 | 76,969,262 | 36  | 291 | 595 | 34  | 314 | 584 | 0.951 | 5.70E-01 | 2.44E-01 |  |  |
| rs4266383  | chr5 | 76,985,514 | 103 | 416 | 403 | 95  | 431 | 406 | 1.02  | 8.20E-01 | 8.62E-02 |  |  |
| rs6453340  | chr5 | 76,998,030 | 2   | 131 | 789 | 2   | 128 | 802 | 1.04  | 8.30E-01 | 8.09E-02 |  |  |
| rs4579228  | chr5 | 76,999,430 | 788 | 132 | 2   | 804 | 127 | 1   | 0.934 | 6.40E-01 | 1.94E-01 |  |  |
| rs1363443  | chr5 | 77,003,202 | 803 | 118 | 1   | 827 | 104 | 1   | 0.866 | 3.30E-01 | 4.81E-01 |  |  |
| rs456910   | chr5 | 77,007,645 | 211 | 444 | 253 | 187 | 484 | 248 | 1.04  | 5.60E-01 | 2.52E-01 |  |  |
| rs441492   | chr5 | 77,009,108 | 136 | 419 | 364 | 115 | 443 | 372 | 1.06  | 3.90E-01 | 4.09E-01 |  |  |
| rs351871   | chr5 | 77,011,795 | 308 | 436 | 173 | 262 | 488 | 175 | 1.11  | 1.10E-01 | 9.59E-01 |  |  |
| rs2112549  | chr5 | 77,012,598 | 800 | 121 | 1   | 827 | 104 | 1   | 0.844 | 2.40E-01 | 6.20E-01 |  |  |
| rs13156814 | chr5 | 77,015,150 | 27  | 267 | 627 | 19  | 265 | 648 | 1.09  | 3.60E-01 | 4.44E-01 |  |  |
| rs2652217  | chr5 | 77,016,000 | 155 | 435 | 332 | 128 | 444 | 360 | 1.13  | 8.10E-02 | 1.09E+00 |  |  |
| rs16874482 | chr5 | 77,017,565 | 29  | 272 | 621 | 21  | 264 | 647 | 1.11  | 2.50E-01 | 6.02E-01 |  |  |
| rs3776921  | chr5 | 77,023,468 | 2   | 148 | 770 | 1   | 125 | 805 | 1.23  | 1.10E-01 | 9.59E-01 |  |  |
| rs2662352  | chr5 | 77,039,051 | 334 | 439 | 149 | 362 | 445 | 125 | 0.893 | 1.00E-01 | 1.00E+00 |  |  |
| rs2652210  | chr5 | 77,044,009 | 175 | 430 | 317 | 194 | 477 | 261 | 0.847 | 1.30E-02 | 1.89E+00 |  |  |
| rs384109   | chr5 | 77,055,665 | 431 | 393 | 94  | 447 | 397 | 81  | 0.935 | 3.70E-01 | 4.32E-01 |  |  |
| rs11954532 | chr5 | 77,061,922 | 21  | 197 | 704 | 9   | 191 | 732 | 1.18  | 1.10E-01 | 9.59E-01 |  |  |
| rs164814   | chr5 | 77,075,851 | 336 | 437 | 149 | 364 | 444 | 124 | 0.891 | 9.30E-02 | 1.03E+00 |  |  |
| rs352580   | chr5 | 77,076,628 | 128 | 440 | 354 | 132 | 425 | 375 | 1.03  | 6.50E-01 | 1.87E-01 |  |  |
| rs153660   | chr5 | 77,114,267 | 2   | 114 | 804 | 3   | 90  | 838 | 1.26  | 1.20E-01 | 9.21E-01 |  |  |
| rs254412   | chr5 | 77,115,208 | 429 | 393 | 99  | 449 | 400 | 83  | 0.923 | 2.70E-01 | 5.69E-01 |  |  |
| rs254409   | chr5 | 77,116,026 | 247 | 447 | 228 | 263 | 478 | 191 | 0.893 | 9.00E-02 | 1.05E+00 |  |  |
| rs1542891  | chr5 | 77,119,407 | 765 | 154 | 3   | 792 | 139 | 1   | 0.861 | 2.40E-01 | 6.20E-01 |  |  |
| rs6453351  | chr5 | 77,130,159 | 74  | 370 | 478 | 76  | 408 | 448 | 0.91  | 2.00E-01 | 6.99E-01 |  |  |
| rs353951   | chr5 | 77,134,325 | 215 | 472 | 232 | 208 | 483 | 239 | 1.03  | 6.80E-01 | 1.67E-01 |  |  |
| rs353958   | chr5 | 77,149,373 | 351 | 446 | 125 | 347 | 456 | 129 | 1.02  | 7.50E-01 | 1.25E-01 |  |  |
| rs16874730 | chr5 | 77,152,147 | 2   | 117 | 801 | 0   | 83  | 849 | 1.51  | 5.80E-03 | 2.24E+00 |  |  |
| rs13170774 | chr5 | 77,153,515 | 180 | 477 | 263 | 196 | 470 | 266 | 0.97  | 6.70E-01 | 1.74E-01 |  |  |
| rs353964   | chr5 | 77,153,970 | 6   | 162 | 754 | 4   | 125 | 803 | 1.36  | 1.30E-02 | 1.89E+00 |  |  |
| rs16874736 | chr5 | 77,154,664 | 0   | 50  | 871 | 1   | 46  | 884 | 1.05  | 8.80E-01 | 5.55E-02 |  |  |
| rs353966   | chr5 | 77,155,123 | 920 | 2   | 0   | 932 | 0   | 0   | 0     | 2.50E-01 | 6.02E-01 |  |  |
| rs353967   | chr5 | 77,155,814 | 1   | 43  | 878 | 1   | 57  | 874 | 0.765 | 2.20E-01 | 6.58E-01 |  |  |

|            |      |            |     |     |     |     |     |     |       |          |          |  |  |
|------------|------|------------|-----|-----|-----|-----|-----|-----|-------|----------|----------|--|--|
| rs10942832 | chr5 | 77,156,405 | 641 | 260 | 20  | 678 | 228 | 26  | 0.909 | 3.10E-01 | 5.09E-01 |  |  |
| rs354616   | chr5 | 77,157,996 | 2   | 95  | 825 | 6   | 99  | 827 | 0.896 | 4.80E-01 | 3.19E-01 |  |  |
| rs6884279  | chr5 | 77,161,966 | 539 | 325 | 55  | 578 | 305 | 46  | 0.876 | 1.00E-01 | 1.00E+00 |  |  |
| rs10514122 | chr5 | 77,164,410 | 69  | 365 | 488 | 72  | 385 | 475 | 0.947 | 4.80E-01 | 3.19E-01 |  |  |
| rs354599   | chr5 | 77,170,153 | 650 | 251 | 21  | 655 | 249 | 28  | 1.04  | 7.30E-01 | 1.37E-01 |  |  |
| rs16874792 | chr5 | 77,176,956 | 921 | 1   | 0   | 931 | 0   | 0   | 0     | 5.00E-01 | 3.01E-01 |  |  |
| rs6881736  | chr5 | 77,179,822 | 215 | 445 | 262 | 224 | 468 | 240 | 0.935 | 3.20E-01 | 4.95E-01 |  |  |
| rs4262083  | chr5 | 77,187,680 | 279 | 448 | 195 | 271 | 470 | 191 | 1.01  | 9.00E-01 | 4.58E-02 |  |  |
| rs1443096  | chr5 | 77,192,490 | 590 | 301 | 31  | 575 | 316 | 38  | 1.09  | 3.10E-01 | 5.09E-01 |  |  |
| rs10514124 | chr5 | 77,195,152 | 107 | 427 | 387 | 92  | 431 | 406 | 1.08  | 2.90E-01 | 5.38E-01 |  |  |
| rs7730738  | chr5 | 77,195,712 | 9   | 213 | 700 | 12  | 213 | 707 | 0.983 | 9.00E-01 | 4.58E-02 |  |  |
| rs4490567  | chr5 | 77,203,846 | 163 | 480 | 279 | 164 | 471 | 297 | 1.04  | 6.30E-01 | 2.01E-01 |  |  |
| rs9687161  | chr5 | 77,206,176 | 169 | 442 | 311 | 150 | 476 | 306 | 1.03  | 7.00E-01 | 1.55E-01 |  |  |
| rs11741162 | chr5 | 77,206,186 | 155 | 475 | 292 | 150 | 466 | 316 | 1.06  | 3.80E-01 | 4.20E-01 |  |  |
| rs2028595  | chr5 | 77,206,340 | 123 | 452 | 347 | 135 | 450 | 347 | 0.968 | 6.50E-01 | 1.87E-01 |  |  |
| rs7734027  | chr5 | 77,209,278 | 85  | 408 | 428 | 98  | 407 | 427 | 0.956 | 5.50E-01 | 2.60E-01 |  |  |
| rs12656623 | chr5 | 77,216,618 | 11  | 204 | 707 | 19  | 227 | 686 | 0.843 | 8.70E-02 | 1.06E+00 |  |  |
| rs10514128 | chr5 | 77,218,411 | 650 | 255 | 17  | 650 | 257 | 25  | 1.06  | 5.40E-01 | 2.68E-01 |  |  |
| rs10440685 | chr5 | 77,218,843 | 751 | 166 | 5   | 737 | 188 | 7   | 1.15  | 2.10E-01 | 6.78E-01 |  |  |
| rs10060355 | chr5 | 77,223,232 | 473 | 395 | 54  | 480 | 372 | 80  | 1.06  | 4.10E-01 | 3.87E-01 |  |  |
| rs16874849 | chr5 | 77,237,118 | 11  | 208 | 703 | 17  | 238 | 677 | 0.834 | 6.60E-02 | 1.18E+00 |  |  |
| rs2885240  | chr5 | 77,237,767 | 9   | 196 | 716 | 13  | 193 | 726 | 0.987 | 9.40E-01 | 2.69E-02 |  |  |
| rs10069818 | chr5 | 77,238,316 | 283 | 465 | 174 | 306 | 443 | 183 | 0.972 | 7.00E-01 | 1.55E-01 |  |  |
| rs6879124  | chr5 | 77,243,578 | 0   | 56  | 866 | 0   | 50  | 882 | 1.14  | 5.80E-01 | 2.37E-01 |  |  |
| rs2289599  | chr5 | 77,243,905 | 82  | 395 | 445 | 92  | 379 | 461 | 1.01  | 9.70E-01 | 1.32E-02 |  |  |
| rs5014235  | chr5 | 77,245,417 | 81  | 396 | 445 | 93  | 379 | 460 | 0.998 | 1.00E+00 | 0.00E+00 |  |  |
| rs4704458  | chr5 | 77,245,924 | 386 | 422 | 114 | 409 | 401 | 122 | 0.972 | 7.10E-01 | 1.49E-01 |  |  |
| rs2120101  | chr5 | 77,246,636 | 209 | 490 | 220 | 226 | 473 | 227 | 0.978 | 7.70E-01 | 1.14E-01 |  |  |
| rs355425   | chr5 | 77,247,426 | 22  | 275 | 625 | 29  | 264 | 639 | 1     | 9.80E-01 | 8.77E-03 |  |  |
| rs902523   | chr5 | 77,251,993 | 667 | 237 | 18  | 684 | 231 | 15  | 0.939 | 5.30E-01 | 2.76E-01 |  |  |
| rs4704462  | chr5 | 77,254,887 | 203 | 488 | 231 | 226 | 483 | 223 | 0.935 | 3.20E-01 | 4.95E-01 |  |  |
| rs10942835 | chr5 | 77,258,559 | 228 | 480 | 214 | 231 | 492 | 209 | 0.983 | 8.20E-01 | 8.62E-02 |  |  |
| rs4704464  | chr5 | 77,258,895 | 716 | 195 | 11  | 743 | 177 | 12  | 0.906 | 3.70E-01 | 4.32E-01 |  |  |
| rs7712357  | chr5 | 77,260,422 | 243 | 460 | 218 | 241 | 472 | 219 | 1.01  | 9.40E-01 | 2.69E-02 |  |  |
| rs16874901 | chr5 | 77,266,238 | 0   | 59  | 863 | 0   | 62  | 870 | 0.961 | 9.00E-01 | 4.58E-02 |  |  |
| rs2044163  | chr5 | 77,267,160 | 0   | 57  | 865 | 0   | 60  | 872 | 0.959 | 9.00E-01 | 4.58E-02 |  |  |
| rs837036   | chr5 | 77,275,676 | 412 | 402 | 107 | 392 | 435 | 105 | 1.05  | 4.80E-01 | 3.19E-01 |  |  |
| rs7725100  | chr5 | 77,280,552 | 388 | 413 | 116 | 380 | 436 | 116 | 1.03  | 7.00E-01 | 1.55E-01 |  |  |
| rs4484406  | chr5 | 77,280,768 | 55  | 371 | 496 | 53  | 378 | 501 | 1.01  | 9.60E-01 | 1.77E-02 |  |  |
| rs10044946 | chr5 | 77,283,634 | 86  | 387 | 449 | 76  | 415 | 441 | 0.995 | 9.70E-01 | 1.32E-02 |  |  |
| rs4704470  | chr5 | 77,283,862 | 37  | 348 | 536 | 41  | 342 | 549 | 1.01  | 9.40E-01 | 2.69E-02 |  |  |
| rs12521066 | chr5 | 77,285,180 | 415 | 399 | 108 | 406 | 426 | 99  | 1.01  | 9.40E-01 | 2.69E-02 |  |  |
| rs7730112  | chr5 | 77,287,544 | 37  | 349 | 536 | 40  | 343 | 549 | 1.01  | 8.90E-01 | 5.06E-02 |  |  |
| rs1948326  | chr5 | 77,297,718 | 861 | 60  | 1   | 871 | 60  | 0   | 0.957 | 8.80E-01 | 5.55E-02 |  |  |
| rs355421   | chr5 | 77,298,038 | 4   | 151 | 766 | 4   | 131 | 797 | 1.17  | 2.10E-01 | 6.78E-01 |  |  |
| rs13154492 | chr5 | 77,298,338 | 1   | 97  | 815 | 3   | 99  | 822 | 0.952 | 7.90E-01 | 1.02E-01 |  |  |
| rs6864833  | chr5 | 77,302,045 | 805 | 114 | 3   | 815 | 114 | 3   | 0.989 | 9.80E-01 | 8.77E-03 |  |  |
| rs355419   | chr5 | 77,302,374 | 434 | 394 | 94  | 429 | 404 | 99  | 1.03  | 6.60E-01 | 1.80E-01 |  |  |
| rs355418   | chr5 | 77,302,448 | 248 | 432 | 242 | 228 | 456 | 248 | 1.06  | 4.10E-01 | 3.87E-01 |  |  |
| rs355416   | chr5 | 77,308,682 | 122 | 408 | 392 | 114 | 401 | 417 | 1.07  | 3.20E-01 | 4.95E-01 |  |  |
| rs355415   | chr5 | 77,309,010 | 715 | 198 | 9   | 751 | 172 | 9   | 0.855 | 1.50E-01 | 8.24E-01 |  |  |
| rs6884769  | chr5 | 77,310,268 | 744 | 168 | 10  | 731 | 193 | 8   | 1.11  | 3.40E-01 | 4.69E-01 |  |  |
| rs6874954  | chr5 | 77,312,857 | 297 | 449 | 176 | 279 | 441 | 212 | 1.13  | 7.50E-02 | 1.12E+00 |  |  |
| rs10064609 | chr5 | 77,314,628 | 101 | 436 | 377 | 116 | 414 | 398 | 1     | 9.80E-01 | 8.77E-03 |  |  |
| rs355412   | chr5 | 77,315,891 | 162 | 458 | 301 | 172 | 456 | 302 | 0.978 | 7.60E-01 | 1.19E-01 |  |  |
| rs837019   | chr5 | 77,317,459 | 42  | 316 | 564 | 32  | 341 | 559 | 0.998 | 9.90E-01 | 4.36E-03 |  |  |
| rs2029526  | chr5 | 77,320,898 | 474 | 359 | 73  | 488 | 349 | 77  | 0.983 | 8.40E-01 | 7.57E-02 |  |  |
| rs1873425  | chr5 | 77,325,504 | 134 | 453 | 335 | 176 | 392 | 364 | 0.966 | 6.40E-01 | 1.94E-01 |  |  |
| rs10078715 | chr5 | 77,326,658 | 2   | 113 | 807 | 4   | 101 | 827 | 1.09  | 5.70E-01 | 2.44E-01 |  |  |
| rs6887042  | chr5 | 77,328,470 | 455 | 388 | 79  | 472 | 361 | 99  | 1.02  | 8.30E-01 | 8.09E-02 |  |  |
| rs3776924  | chr5 | 77,342,146 | 58  | 348 | 516 | 69  | 342 | 521 | 0.969 | 7.10E-01 | 1.49E-01 |  |  |
| rs3822645  | chr5 | 77,349,006 | 895 | 27  | 0   | 907 | 25  | 0   | 0.915 | 8.60E-01 | 6.55E-02 |  |  |
| rs7718254  | chr5 | 77,349,876 | 922 | 0   | 0   | 929 | 3   | 0   | 0     | 2.50E-01 | 6.02E-01 |  |  |
| rs4704474  | chr5 | 77,350,342 | 52  | 323 | 529 | 62  | 313 | 542 | 0.988 | 9.10E-01 | 4.10E-02 |  |  |
| rs380913   | chr5 | 77,372,332 | 45  | 322 | 555 | 56  | 297 | 578 | 1.02  | 8.10E-01 | 9.15E-02 |  |  |
| rs252792   | chr5 | 77,386,080 | 556 | 321 | 45  | 579 | 300 | 53  | 0.971 | 7.40E-01 | 1.31E-01 |  |  |
| rs252783   | chr5 | 77,388,082 | 45  | 321 | 556 | 53  | 298 | 581 | 1.04  | 6.80E-01 | 1.67E-01 |  |  |
| rs34436    | chr5 | 77,394,844 | 734 | 180 | 8   | 767 | 159 | 6   | 0.849 | 1.50E-01 | 8.24E-01 |  |  |
| rs252761   | chr5 | 77,416,479 | 299 | 445 | 146 | 328 | 399 | 166 | 0.981 | 8.00E-01 | 9.69E-02 |  |  |
| rs252751   | chr5 | 77,424,969 | 4   | 157 | 752 | 4   | 129 | 797 | 1.25  | 7.40E-02 | 1.13E+00 |  |  |

|            |      |            |     |     |     |     |     |     |       |          |          |  |  |
|------------|------|------------|-----|-----|-----|-----|-----|-----|-------|----------|----------|--|--|
| rs252749   | chr5 | 77,425,729 | 54  | 343 | 525 | 50  | 334 | 548 | 1.07  | 4.20E-01 | 3.77E-01 |  |  |
| rs3776928  | chr5 | 77,434,007 | 0   | 56  | 865 | 1   | 54  | 877 | 1.01  | 9.70E-01 | 1.32E-02 |  |  |
| rs17191796 | chr5 | 77,444,232 | 710 | 201 | 11  | 702 | 214 | 15  | 1.1   | 3.80E-01 | 4.20E-01 |  |  |
| rs42360    | chr5 | 77,447,767 | 525 | 343 | 54  | 551 | 334 | 47  | 0.921 | 3.00E-01 | 5.23E-01 |  |  |
| rs2052477  | chr5 | 77,473,098 | 52  | 330 | 538 | 46  | 319 | 566 | 1.09  | 2.90E-01 | 5.38E-01 |  |  |
| rs10755299 | chr5 | 77,477,055 | 49  | 332 | 541 | 44  | 322 | 566 | 1.08  | 3.60E-01 | 4.44E-01 |  |  |
| rs4388193  | chr5 | 77,500,300 | 0   | 47  | 875 | 1   | 50  | 881 | 0.911 | 7.20E-01 | 1.43E-01 |  |  |
| rs10428660 | chr5 | 77,509,175 | 504 | 354 | 64  | 527 | 345 | 60  | 0.939 | 4.30E-01 | 3.67E-01 |  |  |
| rs6453374  | chr5 | 77,543,915 | 89  | 409 | 423 | 110 | 406 | 413 | 0.921 | 2.50E-01 | 6.02E-01 |  |  |
| rs10039931 | chr5 | 77,549,929 | 285 | 454 | 183 | 299 | 426 | 207 | 1.02  | 7.40E-01 | 1.31E-01 |  |  |
| rs10043750 | chr5 | 77,560,400 | 92  | 414 | 416 | 103 | 410 | 419 | 0.972 | 7.10E-01 | 1.49E-01 |  |  |
| rs6872407  | chr5 | 77,561,551 | 450 | 393 | 79  | 457 | 385 | 90  | 1.02  | 8.00E-01 | 9.69E-02 |  |  |
| rs6865361  | chr5 | 77,573,127 | 416 | 414 | 92  | 417 | 412 | 103 | 1.03  | 6.60E-01 | 1.80E-01 |  |  |
| rs7726585  | chr5 | 77,582,552 | 158 | 464 | 292 | 180 | 415 | 322 | 1.02  | 8.30E-01 | 8.09E-02 |  |  |
| rs10075003 | chr5 | 77,596,133 | 85  | 390 | 446 | 93  | 394 | 443 | 0.964 | 6.30E-01 | 2.01E-01 |  |  |
| rs10059285 | chr5 | 77,608,195 | 73  | 366 | 482 | 65  | 406 | 460 | 0.952 | 5.30E-01 | 2.76E-01 |  |  |
| rs13163558 | chr5 | 77,613,462 | 73  | 367 | 482 | 65  | 405 | 462 | 0.957 | 5.80E-01 | 2.37E-01 |  |  |
| rs10805919 | chr5 | 77,628,680 | 489 | 351 | 56  | 500 | 360 | 60  | 1.01  | 8.90E-01 | 5.06E-02 |  |  |
| rs9790855  | chr5 | 77,634,610 | 101 | 393 | 428 | 97  | 438 | 397 | 0.929 | 3.10E-01 | 5.09E-01 |  |  |
| rs4572979  | chr5 | 77,641,971 | 171 | 459 | 292 | 156 | 463 | 313 | 1.08  | 2.70E-01 | 5.69E-01 |  |  |
| rs4348192  | chr5 | 77,652,915 | 256 | 460 | 206 | 249 | 485 | 198 | 0.999 | 9.90E-01 | 4.36E-03 |  |  |
| rs10474543 | chr5 | 77,653,935 | 62  | 367 | 493 | 66  | 368 | 498 | 0.99  | 9.20E-01 | 3.62E-02 |  |  |
| rs7356739  | chr5 | 77,658,624 | 511 | 348 | 60  | 496 | 362 | 70  | 1.09  | 2.90E-01 | 5.38E-01 |  |  |
| rs4704495  | chr5 | 77,660,666 | 358 | 425 | 135 | 392 | 413 | 125 | 0.909 | 1.70E-01 | 7.70E-01 |  |  |
| rs4704496  | chr5 | 77,660,704 | 41  | 286 | 595 | 51  | 287 | 594 | 0.945 | 5.20E-01 | 2.84E-01 |  |  |
| rs6881634  | chr5 | 77,666,610 | 341 | 436 | 145 | 348 | 453 | 131 | 0.958 | 5.50E-01 | 2.60E-01 |  |  |
| rs4588572  | chr5 | 77,667,390 | 568 | 304 | 50  | 579 | 296 | 57  | 1.01  | 9.80E-01 | 8.77E-03 |  |  |
| rs4348193  | chr5 | 77,671,476 | 3   | 63  | 856 | 1   | 91  | 840 | 0.74  | 7.50E-02 | 1.12E+00 |  |  |
| rs13154903 | chr5 | 77,672,488 | 747 | 167 | 8   | 714 | 206 | 12  | 1.28  | 2.20E-02 | 1.66E+00 |  |  |
| rs9293744  | chr5 | 77,672,779 | 450 | 383 | 89  | 420 | 413 | 99  | 1.12  | 1.30E-01 | 8.86E-01 |  |  |
| rs11749979 | chr5 | 77,675,946 | 307 | 432 | 183 | 354 | 434 | 144 | 0.829 | 5.50E-03 | 2.26E+00 |  |  |
| rs7722126  | chr5 | 77,681,540 | 59  | 348 | 515 | 65  | 363 | 503 | 0.939 | 4.20E-01 | 3.77E-01 |  |  |
| rs4267850  | chr5 | 77,683,520 | 190 | 453 | 278 | 206 | 466 | 260 | 0.927 | 2.60E-01 | 5.85E-01 |  |  |
| rs4704506  | chr5 | 77,690,583 | 863 | 57  | 2   | 849 | 82  | 1   | 1.38  | 7.20E-02 | 1.14E+00 |  |  |
| rs10065260 | chr5 | 77,699,192 | 232 | 447 | 243 | 223 | 476 | 233 | 0.998 | 1.00E+00 | 0.00E+00 |  |  |
| rs12110158 | chr5 | 77,710,302 | 231 | 441 | 245 | 218 | 477 | 234 | 1     | 9.80E-01 | 8.77E-03 |  |  |
| rs4360024  | chr5 | 77,719,962 | 872 | 48  | 2   | 867 | 64  | 1   | 1.26  | 2.50E-01 | 6.02E-01 |  |  |
| rs1346566  | chr5 | 77,731,814 | 717 | 193 | 12  | 741 | 179 | 7   | 0.871 | 2.10E-01 | 6.78E-01 |  |  |
| rs3822476  | chr5 | 77,749,577 | 850 | 69  | 3   | 850 | 80  | 2   | 1.11  | 5.60E-01 | 2.52E-01 |  |  |
| rs16875382 | chr5 | 77,754,242 | 921 | 1   | 0   | 929 | 3   | 0   | 2.97  | 6.20E-01 | 2.08E-01 |  |  |
| rs1968382  | chr5 | 77,757,160 | 449 | 383 | 90  | 446 | 407 | 79  | 0.99  | 9.10E-01 | 4.10E-02 |  |  |
| rs6860842  | chr5 | 77,775,106 | 70  | 367 | 467 | 61  | 373 | 482 | 1.05  | 5.10E-01 | 2.92E-01 |  |  |
| rs6873144  | chr5 | 77,777,540 | 549 | 327 | 46  | 546 | 337 | 49  | 1.04  | 6.90E-01 | 1.61E-01 |  |  |
| rs10063742 | chr5 | 77,795,118 | 38  | 291 | 593 | 40  | 290 | 602 | 1     | 1.00E+00 | 0.00E+00 |  |  |
| rs1159930  | chr5 | 77,804,699 | 46  | 333 | 543 | 52  | 336 | 544 | 0.969 | 7.20E-01 | 1.43E-01 |  |  |
| rs1428864  | chr5 | 77,816,019 | 545 | 335 | 42  | 543 | 338 | 51  | 1.05  | 5.50E-01 | 2.60E-01 |  |  |
| rs10514138 | chr5 | 77,822,520 | 245 | 447 | 230 | 230 | 478 | 224 | 1.02  | 7.90E-01 | 1.02E-01 |  |  |
| rs11952677 | chr5 | 77,823,690 | 482 | 363 | 77  | 493 | 356 | 83  | 0.998 | 9.90E-01 | 4.36E-03 |  |  |
| rs16875506 | chr5 | 77,824,547 | 443 | 385 | 94  | 442 | 409 | 81  | 0.98  | 8.00E-01 | 9.69E-02 |  |  |
| rs7700390  | chr5 | 77,825,288 | 34  | 299 | 589 | 44  | 288 | 600 | 0.983 | 8.70E-01 | 6.05E-02 |  |  |
| rs11737914 | chr5 | 77,832,467 | 472 | 373 | 71  | 495 | 376 | 57  | 0.917 | 2.60E-01 | 5.85E-01 |  |  |
| rs876606   | chr5 | 77,836,839 | 75  | 366 | 481 | 64  | 376 | 492 | 1.05  | 5.40E-01 | 2.68E-01 |  |  |
| rs876605   | chr5 | 77,837,115 | 47  | 356 | 519 | 65  | 349 | 518 | 0.933 | 3.80E-01 | 4.20E-01 |  |  |
| rs751659   | chr5 | 77,837,944 | 11  | 124 | 787 | 14  | 150 | 768 | 0.814 | 8.90E-02 | 1.05E+00 |  |  |
| rs6874671  | chr5 | 77,840,571 | 12  | 192 | 718 | 11  | 180 | 741 | 1.09  | 4.30E-01 | 3.67E-01 |  |  |
| rs10462558 | chr5 | 77,842,744 | 878 | 44  | 0   | 878 | 52  | 2   | 1.27  | 2.90E-01 | 5.38E-01 |  |  |
| rs11749358 | chr5 | 77,845,745 | 470 | 378 | 74  | 481 | 389 | 62  | 0.951 | 5.20E-01 | 2.84E-01 |  |  |
| rs7711188  | chr5 | 77,847,064 | 131 | 405 | 386 | 134 | 423 | 375 | 0.962 | 5.90E-01 | 2.29E-01 |  |  |
| rs7713690  | chr5 | 77,850,557 | 370 | 408 | 144 | 362 | 423 | 147 | 1.03  | 6.80E-01 | 1.67E-01 |  |  |
| rs4704514  | chr5 | 77,855,837 | 74  | 339 | 509 | 84  | 367 | 481 | 0.891 | 1.30E-01 | 8.86E-01 |  |  |
| rs6453401  | chr5 | 77,865,196 | 268 | 455 | 199 | 265 | 443 | 223 | 1.06  | 3.80E-01 | 4.20E-01 |  |  |
| rs7730720  | chr5 | 77,871,110 | 266 | 444 | 211 | 263 | 432 | 235 | 1.06  | 3.80E-01 | 4.20E-01 |  |  |
| rs965829   | chr5 | 77,885,683 | 260 | 457 | 205 | 263 | 436 | 233 | 1.06  | 4.20E-01 | 3.77E-01 |  |  |
| rs344651   | chr5 | 77,888,754 | 613 | 280 | 29  | 676 | 235 | 21  | 0.778 | 5.20E-03 | 2.28E+00 |  |  |
| rs13183553 | chr5 | 77,923,494 | 206 | 456 | 260 | 239 | 431 | 262 | 0.934 | 3.20E-01 | 4.95E-01 |  |  |
| rs344656   | chr5 | 77,927,783 | 736 | 180 | 6   | 758 | 159 | 15  | 0.971 | 8.30E-01 | 8.09E-02 |  |  |
| rs10060136 | chr5 | 77,943,384 | 273 | 451 | 197 | 274 | 432 | 226 | 1.06  | 3.60E-01 | 4.44E-01 |  |  |
| rs1372319  | chr5 | 77,945,695 | 430 | 397 | 94  | 491 | 365 | 76  | 0.825 | 8.20E-03 | 2.09E+00 |  |  |
| rs1441711  | chr5 | 77,946,687 | 303 | 441 | 178 | 292 | 440 | 200 | 1.08  | 2.70E-01 | 5.69E-01 |  |  |
| rs1035856  | chr5 | 77,952,104 | 0   | 38  | 884 | 1   | 42  | 889 | 0.87  | 6.10E-01 | 2.15E-01 |  |  |

|            |      |            |     |     |     |     |     |     |       |          |          |  |  |
|------------|------|------------|-----|-----|-----|-----|-----|-----|-------|----------|----------|--|--|
| rs9293756  | chr5 | 77,953,892 | 291 | 434 | 197 | 276 | 448 | 208 | 1.06  | 3.90E-01 | 4.09E-01 |  |  |
| rs12651937 | chr5 | 77,958,295 | 100 | 402 | 420 | 130 | 419 | 383 | 0.846 | 1.70E-02 | 1.77E+00 |  |  |
| rs9293757  | chr5 | 77,959,776 | 99  | 403 | 419 | 129 | 421 | 382 | 0.845 | 1.70E-02 | 1.77E+00 |  |  |
| rs7722214  | chr5 | 77,962,037 | 83  | 397 | 442 | 122 | 404 | 406 | 0.825 | 6.70E-03 | 2.17E+00 |  |  |
| rs17391168 | chr5 | 77,962,789 | 439 | 396 | 87  | 400 | 412 | 120 | 1.2   | 9.30E-03 | 2.03E+00 |  |  |
| rs341903   | chr5 | 77,968,847 | 529 | 340 | 53  | 580 | 308 | 44  | 0.846 | 3.60E-02 | 1.44E+00 |  |  |
| rs341930   | chr5 | 77,973,209 | 173 | 453 | 291 | 157 | 471 | 301 | 1.06  | 4.40E-01 | 3.57E-01 |  |  |
| rs341917   | chr5 | 77,985,321 | 225 | 449 | 226 | 217 | 466 | 211 | 0.984 | 8.40E-01 | 7.57E-02 |  |  |
| rs184652   | chr5 | 77,997,230 | 425 | 395 | 102 | 468 | 376 | 88  | 0.874 | 6.40E-02 | 1.19E+00 |  |  |
| rs6868351  | chr5 | 77,998,195 | 505 | 345 | 72  | 461 | 386 | 85  | 1.18  | 2.80E-02 | 1.55E+00 |  |  |
| rs341908   | chr5 | 78,000,473 | 510 | 341 | 71  | 462 | 386 | 84  | 1.19  | 1.80E-02 | 1.74E+00 |  |  |
| rs341911   | chr5 | 78,002,381 | 637 | 256 | 29  | 611 | 288 | 33  | 1.14  | 1.30E-01 | 8.86E-01 |  |  |
| rs1961557  | chr5 | 78,008,926 | 37  | 294 | 586 | 38  | 295 | 592 | 1     | 9.70E-01 | 1.32E-02 |  |  |
| rs341900   | chr5 | 78,012,796 | 510 | 338 | 66  | 459 | 381 | 80  | 1.2   | 1.40E-02 | 1.85E+00 |  |  |
| rs413921   | chr5 | 78,020,121 | 644 | 249 | 29  | 619 | 281 | 32  | 1.14  | 1.50E-01 | 8.24E-01 |  |  |
| rs784420   | chr5 | 78,023,280 | 458 | 374 | 88  | 486 | 371 | 75  | 0.91  | 2.10E-01 | 6.78E-01 |  |  |
| rs340085   | chr5 | 78,034,542 | 209 | 462 | 251 | 222 | 466 | 244 | 0.957 | 5.20E-01 | 2.84E-01 |  |  |
| rs920581   | chr5 | 78,035,032 | 738 | 172 | 12  | 722 | 202 | 8   | 1.11  | 3.30E-01 | 4.81E-01 |  |  |
| rs920584   | chr5 | 78,038,407 | 676 | 228 | 18  | 674 | 239 | 19  | 1.04  | 6.70E-01 | 1.74E-01 |  |  |
| rs6893444  | chr5 | 78,047,949 | 22  | 243 | 657 | 24  | 243 | 665 | 0.996 | 1.00E+00 | 0.00E+00 |  |  |
| rs11750463 | chr5 | 78,052,472 | 2   | 102 | 818 | 5   | 106 | 821 | 0.919 | 5.90E-01 | 2.29E-01 |  |  |
| rs745981   | chr5 | 78,052,616 | 506 | 357 | 59  | 520 | 350 | 62  | 0.983 | 8.50E-01 | 7.06E-02 |  |  |
| rs539990   | chr5 | 78,055,922 | 332 | 421 | 167 | 342 | 450 | 138 | 0.92  | 2.30E-01 | 6.38E-01 |  |  |
| rs569523   | chr5 | 78,060,122 | 85  | 359 | 478 | 81  | 400 | 451 | 0.932 | 3.50E-01 | 4.56E-01 |  |  |
| rs252241   | chr5 | 78,064,724 | 537 | 329 | 56  | 579 | 310 | 43  | 0.858 | 5.70E-02 | 1.24E+00 |  |  |
| rs6897874  | chr5 | 78,070,277 | 238 | 470 | 214 | 247 | 462 | 223 | 1     | 9.80E-01 | 8.77E-03 |  |  |
| rs6878810  | chr5 | 78,070,561 | 12  | 166 | 744 | 8   | 158 | 766 | 1.12  | 3.50E-01 | 4.56E-01 |  |  |
| rs6866961  | chr5 | 78,071,900 | 9   | 190 | 723 | 5   | 202 | 725 | 0.991 | 9.70E-01 | 1.32E-02 |  |  |
| rs2453766  | chr5 | 78,072,894 | 31  | 250 | 641 | 29  | 297 | 606 | 0.866 | 1.00E-01 | 1.00E+00 |  |  |
| rs13164947 | chr5 | 78,077,732 | 298 | 443 | 180 | 282 | 472 | 178 | 1.03  | 6.40E-01 | 1.94E-01 |  |  |
| rs13164005 | chr5 | 78,077,895 | 103 | 432 | 387 | 109 | 401 | 422 | 1.06  | 3.90E-01 | 4.09E-01 |  |  |
| rs16875859 | chr5 | 78,077,971 | 819 | 98  | 5   | 829 | 102 | 1   | 0.95  | 7.70E-01 | 1.14E-01 |  |  |
| rs2173013  | chr5 | 78,086,979 | 758 | 153 | 11  | 755 | 170 | 7   | 1.04  | 7.40E-01 | 1.31E-01 |  |  |
| rs546261   | chr5 | 78,087,129 | 758 | 152 | 11  | 755 | 170 | 7   | 1.05  | 7.00E-01 | 1.55E-01 |  |  |
| rs252235   | chr5 | 78,096,896 | 725 | 184 | 13  | 719 | 195 | 18  | 1.1   | 3.70E-01 | 4.32E-01 |  |  |
| rs2029905  | chr5 | 78,098,166 | 51  | 356 | 515 | 47  | 338 | 547 | 1.1   | 2.50E-01 | 6.02E-01 |  |  |
| rs6863289  | chr5 | 78,101,389 | 258 | 449 | 215 | 248 | 489 | 195 | 0.98  | 7.80E-01 | 1.08E-01 |  |  |
| rs2132537  | chr5 | 78,103,740 | 352 | 435 | 135 | 360 | 460 | 112 | 0.937 | 3.50E-01 | 4.56E-01 |  |  |
| rs17218031 | chr5 | 78,105,411 | 92  | 366 | 463 | 68  | 423 | 441 | 0.994 | 9.60E-01 | 1.77E-02 |  |  |
| rs7732938  | chr5 | 78,108,516 | 51  | 350 | 520 | 42  | 347 | 543 | 1.08  | 3.30E-01 | 4.81E-01 |  |  |
| rs16875887 | chr5 | 78,108,781 | 815 | 104 | 3   | 826 | 102 | 4   | 0.989 | 9.90E-01 | 4.36E-03 |  |  |
| rs7704939  | chr5 | 78,109,954 | 322 | 463 | 137 | 344 | 437 | 151 | 0.987 | 8.70E-01 | 6.05E-02 |  |  |
| rs754566   | chr5 | 78,110,674 | 262 | 465 | 195 | 268 | 464 | 199 | 0.997 | 9.90E-01 | 4.36E-03 |  |  |
| rs754567   | chr5 | 78,110,719 | 388 | 432 | 102 | 385 | 433 | 114 | 1.04  | 5.60E-01 | 2.52E-01 |  |  |
| rs2173012  | chr5 | 78,111,916 | 7   | 98  | 817 | 2   | 111 | 819 | 0.983 | 9.60E-01 | 1.77E-02 |  |  |
| rs6453415  | chr5 | 78,115,386 | 21  | 223 | 674 | 22  | 211 | 698 | 1.06  | 5.50E-01 | 2.60E-01 |  |  |
| rs16875913 | chr5 | 78,119,807 | 748 | 163 | 11  | 767 | 151 | 14  | 0.953 | 7.00E-01 | 1.55E-01 |  |  |
| rs3846677  | chr5 | 78,125,189 | 616 | 264 | 42  | 630 | 273 | 29  | 0.928 | 4.00E-01 | 3.98E-01 |  |  |
| rs16875919 | chr5 | 78,130,139 | 15  | 215 | 692 | 24  | 192 | 716 | 1.04  | 7.50E-01 | 1.25E-01 |  |  |
| rs7727110  | chr5 | 78,131,146 | 69  | 373 | 480 | 59  | 385 | 488 | 1.04  | 6.50E-01 | 1.87E-01 |  |  |
| rs11960862 | chr5 | 78,132,976 | 567 | 320 | 35  | 574 | 305 | 53  | 1.05  | 5.30E-01 | 2.76E-01 |  |  |
| rs17818103 | chr5 | 78,133,045 | 124 | 414 | 384 | 127 | 412 | 393 | 1.01  | 9.40E-01 | 2.69E-02 |  |  |
| rs16875940 | chr5 | 78,135,472 | 803 | 116 | 3   | 793 | 134 | 5   | 1.18  | 2.10E-01 | 6.78E-01 |  |  |
| rs16875951 | chr5 | 78,136,947 | 14  | 195 | 713 | 18  | 179 | 735 | 1.06  | 6.30E-01 | 2.01E-01 |  |  |
| rs10514108 | chr5 | 78,141,103 | 5   | 157 | 758 | 9   | 177 | 746 | 0.854 | 1.70E-01 | 7.70E-01 |  |  |
| rs12054837 | chr5 | 78,142,127 | 796 | 120 | 5   | 792 | 136 | 4   | 1.1   | 4.80E-01 | 3.19E-01 |  |  |
| rs4704524  | chr5 | 78,144,211 | 770 | 147 | 5   | 754 | 169 | 9   | 1.2   | 1.20E-01 | 9.21E-01 |  |  |
| rs6453416  | chr5 | 78,145,474 | 732 | 178 | 11  | 722 | 197 | 13  | 1.12  | 3.10E-01 | 5.09E-01 |  |  |
| rs13152961 | chr5 | 78,145,873 | 38  | 238 | 643 | 38  | 244 | 648 | 0.992 | 9.60E-01 | 1.77E-02 |  |  |
| rs6453417  | chr5 | 78,146,288 | 262 | 403 | 257 | 283 | 431 | 218 | 0.879 | 5.40E-02 | 1.27E+00 |  |  |
| rs16875961 | chr5 | 78,151,267 | 688 | 224 | 10  | 712 | 206 | 14  | 0.941 | 5.70E-01 | 2.44E-01 |  |  |
| rs3857404  | chr5 | 78,152,550 | 124 | 440 | 357 | 115 | 425 | 391 | 1.1   | 1.80E-01 | 7.45E-01 |  |  |
| rs13172853 | chr5 | 78,155,021 | 5   | 108 | 809 | 3   | 113 | 816 | 1     | 9.60E-01 | 1.77E-02 |  |  |
| rs4704525  | chr5 | 78,159,240 | 504 | 361 | 57  | 493 | 386 | 53  | 1.03  | 6.90E-01 | 1.61E-01 |  |  |
| rs12655291 | chr5 | 78,159,785 | 651 | 245 | 26  | 646 | 261 | 25  | 1.04  | 6.70E-01 | 1.74E-01 |  |  |
| rs10058261 | chr5 | 78,162,131 | 4   | 90  | 828 | 3   | 95  | 834 | 0.98  | 9.50E-01 | 2.23E-02 |  |  |
| rs10454897 | chr5 | 78,167,092 | 167 | 462 | 292 | 172 | 453 | 307 | 1.02  | 8.00E-01 | 9.69E-02 |  |  |
| rs25413    | chr5 | 78,170,957 | 203 | 442 | 270 | 238 | 427 | 255 | 0.896 | 1.00E-01 | 1.00E+00 |  |  |
| rs13356637 | chr5 | 78,185,903 | 592 | 295 | 32  | 599 | 290 | 40  | 1.02  | 8.00E-01 | 9.69E-02 |  |  |
| rs3098681  | chr5 | 78,187,948 | 112 | 436 | 361 | 134 | 414 | 367 | 0.959 | 5.70E-01 | 2.44E-01 |  |  |

|            |      |            |     |     |     |     |     |     |       |          |          |  |  |
|------------|------|------------|-----|-----|-----|-----|-----|-----|-------|----------|----------|--|--|
| rs13184327 | chr5 | 78,195,391 | 458 | 392 | 69  | 452 | 403 | 75  | 1.04  | 5.70E-01 | 2.44E-01 |  |  |
| rs4515284  | chr5 | 78,205,757 | 29  | 242 | 646 | 19  | 252 | 657 | 1.06  | 5.70E-01 | 2.44E-01 |  |  |
| rs4704531  | chr5 | 78,215,360 | 32  | 262 | 624 | 23  | 274 | 633 | 1.04  | 6.90E-01 | 1.61E-01 |  |  |
| rs6893857  | chr5 | 78,220,159 | 595 | 288 | 39  | 598 | 303 | 31  | 0.983 | 8.70E-01 | 6.05E-02 |  |  |
| rs11741352 | chr5 | 78,222,314 | 167 | 462 | 293 | 175 | 457 | 299 | 0.993 | 9.40E-01 | 2.69E-02 |  |  |
| rs163299   | chr5 | 78,224,171 | 32  | 294 | 584 | 41  | 296 | 577 | 0.939 | 4.70E-01 | 3.28E-01 |  |  |
| rs163215   | chr5 | 78,226,124 | 785 | 132 | 5   | 789 | 138 | 5   | 1.03  | 8.30E-01 | 8.09E-02 |  |  |
| rs337875   | chr5 | 78,230,753 | 376 | 434 | 112 | 403 | 413 | 116 | 0.954 | 5.10E-01 | 2.92E-01 |  |  |
| rs234688   | chr5 | 78,235,210 | 371 | 430 | 116 | 397 | 412 | 117 | 0.948 | 4.60E-01 | 3.37E-01 |  |  |
| rs337853   | chr5 | 78,238,582 | 335 | 417 | 170 | 312 | 461 | 159 | 1.03  | 6.70E-01 | 1.74E-01 |  |  |
| rs10052939 | chr5 | 78,239,821 | 404 | 398 | 118 | 390 | 447 | 94  | 0.984 | 8.50E-01 | 7.06E-02 |  |  |
| rs337849   | chr5 | 78,242,725 | 76  | 388 | 458 | 70  | 402 | 460 | 1.01  | 9.20E-01 | 3.62E-02 |  |  |
| rs12655738 | chr5 | 78,243,298 | 111 | 388 | 423 | 82  | 436 | 413 | 1.04  | 6.00E-01 | 2.22E-01 |  |  |
| rs11738153 | chr5 | 78,249,607 | 424 | 387 | 110 | 408 | 439 | 85  | 0.987 | 8.80E-01 | 5.55E-02 |  |  |
| rs338460   | chr5 | 78,252,634 | 197 | 470 | 255 | 202 | 485 | 245 | 0.967 | 6.30E-01 | 2.01E-01 |  |  |
| rs10053925 | chr5 | 78,255,785 | 642 | 261 | 19  | 665 | 244 | 23  | 0.952 | 6.20E-01 | 2.08E-01 |  |  |
| rs337895   | chr5 | 78,257,702 | 587 | 305 | 29  | 595 | 301 | 34  | 1.01  | 9.50E-01 | 2.23E-02 |  |  |
| rs337887   | chr5 | 78,264,792 | 250 | 480 | 192 | 252 | 493 | 186 | 0.984 | 8.30E-01 | 8.09E-02 |  |  |
| rs4421085  | chr5 | 78,268,209 | 30  | 304 | 588 | 34  | 300 | 598 | 1     | 9.70E-01 | 1.32E-02 |  |  |
| rs337844   | chr5 | 78,269,310 | 30  | 292 | 589 | 34  | 296 | 594 | 0.976 | 8.00E-01 | 9.69E-02 |  |  |
| rs447998   | chr5 | 78,285,889 | 61  | 354 | 507 | 56  | 358 | 518 | 1.03  | 7.00E-01 | 1.55E-01 |  |  |
| rs234910   | chr5 | 78,293,007 | 285 | 456 | 181 | 281 | 473 | 178 | 1     | 9.70E-01 | 1.32E-02 |  |  |
| rs7725928  | chr5 | 78,295,401 | 610 | 269 | 32  | 603 | 290 | 29  | 1.04  | 6.70E-01 | 1.74E-01 |  |  |
| rs337847   | chr5 | 78,295,644 | 746 | 164 | 6   | 775 | 150 | 5   | 0.886 | 3.20E-01 | 4.95E-01 |  |  |
| rs921945   | chr5 | 78,297,713 | 613 | 276 | 33  | 605 | 295 | 32  | 1.05  | 6.10E-01 | 2.15E-01 |  |  |
| rs3733895  | chr5 | 78,300,797 | 391 | 395 | 136 | 369 | 456 | 107 | 0.99  | 9.10E-01 | 4.10E-02 |  |  |
| rs13178105 | chr5 | 78,303,884 | 35  | 247 | 640 | 23  | 271 | 638 | 1.01  | 9.20E-01 | 3.62E-02 |  |  |
| rs6453423  | chr5 | 78,304,645 | 70  | 350 | 502 | 61  | 370 | 501 | 1.01  | 9.30E-01 | 3.15E-02 |  |  |
| rs7730428  | chr5 | 78,305,346 | 70  | 350 | 502 | 61  | 370 | 501 | 1.01  | 9.30E-01 | 3.15E-02 |  |  |
| rs6888024  | chr5 | 78,307,038 | 588 | 293 | 40  | 608 | 291 | 33  | 0.933 | 4.20E-01 | 3.77E-01 |  |  |
| rs2052550  | chr5 | 78,308,698 | 51  | 359 | 510 | 58  | 344 | 530 | 1.02  | 8.20E-01 | 8.62E-02 |  |  |
| rs672413   | chr5 | 78,313,985 | 99  | 389 | 434 | 102 | 407 | 423 | 0.958 | 5.60E-01 | 2.52E-01 |  |  |
| rs163129   | chr5 | 78,315,576 | 16  | 200 | 706 | 17  | 187 | 728 | 1.07  | 5.30E-01 | 2.76E-01 |  |  |
| rs163125   | chr5 | 78,318,426 | 627 | 268 | 27  | 614 | 281 | 37  | 1.11  | 2.30E-01 | 6.38E-01 |  |  |
| rs163132   | chr5 | 78,321,677 | 533 | 338 | 50  | 524 | 342 | 65  | 1.09  | 2.80E-01 | 5.53E-01 |  |  |
| rs336526   | chr5 | 78,323,335 | 67  | 360 | 495 | 81  | 367 | 484 | 0.923 | 3.00E-01 | 5.23E-01 |  |  |
| rs9293761  | chr5 | 78,325,971 | 179 | 441 | 302 | 171 | 451 | 310 | 1.03  | 6.50E-01 | 1.87E-01 |  |  |
| rs28326    | chr5 | 78,331,610 | 604 | 278 | 40  | 612 | 279 | 41  | 0.997 | 1.00E+00 | 0.00E+00 |  |  |
| rs7710824  | chr5 | 78,333,027 | 48  | 338 | 536 | 60  | 363 | 509 | 0.88  | 1.00E-01 | 1.00E+00 |  |  |
| rs3797535  | chr5 | 78,336,153 | 3   | 129 | 790 | 5   | 143 | 784 | 0.883 | 3.40E-01 | 4.69E-01 |  |  |
| rs250513   | chr5 | 78,337,952 | 56  | 341 | 523 | 62  | 324 | 544 | 1.03  | 7.30E-01 | 1.37E-01 |  |  |
| rs479405   | chr5 | 78,338,615 | 290 | 466 | 166 | 298 | 448 | 186 | 1.03  | 6.80E-01 | 1.67E-01 |  |  |
| rs10514151 | chr5 | 78,339,243 | 3   | 123 | 796 | 7   | 116 | 808 | 1     | 9.60E-01 | 1.77E-02 |  |  |
| rs570207   | chr5 | 78,343,065 | 77  | 408 | 437 | 93  | 380 | 459 | 1.01  | 9.70E-01 | 1.32E-02 |  |  |
| rs2445887  | chr5 | 78,345,800 | 172 | 453 | 267 | 204 | 425 | 263 | 0.922 | 2.40E-01 | 6.20E-01 |  |  |
| rs2034900  | chr5 | 78,351,720 | 67  | 355 | 500 | 87  | 368 | 477 | 0.88  | 8.90E-02 | 1.05E+00 |  |  |
| rs10514153 | chr5 | 78,352,186 | 15  | 191 | 716 | 13  | 219 | 700 | 0.9   | 3.10E-01 | 5.09E-01 |  |  |
| rs463614   | chr5 | 78,355,378 | 263 | 459 | 200 | 290 | 444 | 198 | 0.941 | 3.70E-01 | 4.32E-01 |  |  |
| rs2431332  | chr5 | 78,356,865 | 507 | 355 | 60  | 537 | 321 | 74  | 0.969 | 7.00E-01 | 1.55E-01 |  |  |
| rs10514154 | chr5 | 78,359,190 | 642 | 249 | 31  | 625 | 271 | 36  | 1.11  | 2.40E-01 | 6.20E-01 |  |  |
| rs933684   | chr5 | 78,359,831 | 499 | 357 | 66  | 477 | 368 | 87  | 1.14  | 8.90E-02 | 1.05E+00 |  |  |
| rs1805074  | chr5 | 78,360,108 | 489 | 349 | 66  | 471 | 364 | 87  | 1.14  | 9.00E-02 | 1.05E+00 |  |  |
| rs402701   | chr5 | 78,366,278 | 286 | 459 | 177 | 279 | 447 | 206 | 1.08  | 2.40E-01 | 6.20E-01 |  |  |
| rs248383   | chr5 | 78,375,511 | 268 | 449 | 203 | 238 | 462 | 232 | 1.14  | 5.50E-02 | 1.26E+00 |  |  |
| rs532964   | chr5 | 78,376,042 | 203 | 451 | 268 | 232 | 462 | 238 | 0.88  | 5.50E-02 | 1.26E+00 |  |  |
| rs6873326  | chr5 | 78,387,268 | 752 | 161 | 9   | 743 | 175 | 14  | 1.14  | 2.60E-01 | 5.85E-01 |  |  |
| rs7705204  | chr5 | 78,389,703 | 0   | 35  | 887 | 0   | 27  | 905 | 1.32  | 3.50E-01 | 4.56E-01 |  |  |
| rs1984685  | chr5 | 78,392,192 | 886 | 36  | 0   | 905 | 27  | 0   | 0.738 | 2.90E-01 | 5.38E-01 |  |  |
| rs642431   | chr5 | 78,400,443 | 561 | 304 | 57  | 573 | 301 | 58  | 0.983 | 8.60E-01 | 6.55E-02 |  |  |
| rs670220   | chr5 | 78,402,082 | 57  | 303 | 562 | 57  | 301 | 574 | 1.02  | 8.30E-01 | 8.09E-02 |  |  |
| rs626105   | chr5 | 78,405,657 | 58  | 303 | 561 | 57  | 301 | 574 | 1.03  | 7.70E-01 | 1.14E-01 |  |  |
| rs682985   | chr5 | 78,409,187 | 349 | 428 | 145 | 326 | 452 | 154 | 1.08  | 2.70E-01 | 5.69E-01 |  |  |
| rs625879   | chr5 | 78,417,445 | 141 | 430 | 351 | 153 | 450 | 327 | 0.919 | 2.20E-01 | 6.58E-01 |  |  |
| rs575425   | chr5 | 78,425,668 | 115 | 414 | 392 | 127 | 437 | 364 | 0.906 | 1.60E-01 | 7.96E-01 |  |  |
| rs586199   | chr5 | 78,433,736 | 260 | 450 | 211 | 223 | 468 | 241 | 1.16  | 3.00E-02 | 1.52E+00 |  |  |
| rs631305   | chr5 | 78,439,134 | 38  | 250 | 634 | 40  | 252 | 640 | 0.991 | 9.50E-01 | 2.23E-02 |  |  |
| rs492842   | chr5 | 78,445,743 | 359 | 427 | 133 | 338 | 450 | 140 | 1.07  | 3.30E-01 | 4.81E-01 |  |  |
| rs6894156  | chr5 | 78,445,901 | 9   | 155 | 758 | 14  | 172 | 746 | 0.861 | 1.90E-01 | 7.21E-01 |  |  |
| rs6875201  | chr5 | 78,446,320 | 750 | 162 | 9   | 740 | 177 | 14  | 1.14  | 2.40E-01 | 6.20E-01 |  |  |
| rs3797546  | chr5 | 78,449,260 | 850 | 69  | 0   | 846 | 81  | 0   | 1.17  | 3.90E-01 | 4.09E-01 |  |  |



|            |      |            |     |     |     |     |     |     |       |          |          |  |  |
|------------|------|------------|-----|-----|-----|-----|-----|-----|-------|----------|----------|--|--|
| rs567754   | chr5 | 78,452,172 | 91  | 430 | 401 | 94  | 414 | 424 | 1.04  | 5.90E-01 | 2.29E-01 |  |  |
| rs3733890  | chr5 | 78,457,715 | 96  | 357 | 469 | 80  | 402 | 448 | 0.979 | 8.00E-01 | 9.69E-02 |  |  |
| rs558133   | chr5 | 78,460,944 | 422 | 400 | 100 | 422 | 405 | 105 | 1.02  | 7.90E-01 | 1.02E-01 |  |  |
| rs13158309 | chr5 | 78,499,151 | 346 | 446 | 130 | 357 | 449 | 126 | 0.972 | 6.90E-01 | 1.61E-01 |  |  |
| rs2121107  | chr5 | 78,503,760 | 98  | 438 | 386 | 95  | 430 | 407 | 1.05  | 4.90E-01 | 3.10E-01 |  |  |
| rs4704546  | chr5 | 78,556,487 | 99  | 440 | 383 | 101 | 429 | 402 | 1.03  | 6.60E-01 | 1.80E-01 |  |  |
| rs13354432 | chr5 | 78,556,800 | 826 | 92  | 4   | 841 | 89  | 2   | 0.916 | 6.00E-01 | 2.22E-01 |  |  |
| rs10474578 | chr5 | 78,578,046 | 339 | 454 | 129 | 357 | 444 | 131 | 0.969 | 6.70E-01 | 1.74E-01 |  |  |
| rs2591392  | chr5 | 78,582,049 | 119 | 447 | 356 | 116 | 447 | 369 | 1.03  | 6.70E-01 | 1.74E-01 |  |  |
| rs2607142  | chr5 | 78,593,704 | 338 | 455 | 129 | 357 | 444 | 130 | 0.964 | 6.10E-01 | 2.15E-01 |  |  |
| rs13178271 | chr5 | 78,629,653 | 0   | 25  | 896 | 0   | 23  | 909 | 1.1   | 8.50E-01 | 7.06E-02 |  |  |
| rs10514159 | chr5 | 78,631,800 | 138 | 451 | 333 | 127 | 457 | 348 | 1.06  | 4.40E-01 | 3.57E-01 |  |  |
| rs6864184  | chr5 | 78,645,111 | 162 | 446 | 314 | 142 | 474 | 316 | 1.05  | 5.20E-01 | 2.84E-01 |  |  |
| rs1062326  | chr5 | 78,653,290 | 120 | 449 | 353 | 117 | 447 | 368 | 1.04  | 6.20E-01 | 2.08E-01 |  |  |
| rs9293769  | chr5 | 78,665,102 | 342 | 423 | 156 | 341 | 452 | 139 | 0.97  | 6.70E-01 | 1.74E-01 |  |  |
| rs9885487  | chr5 | 78,675,132 | 69  | 311 | 542 | 52  | 334 | 546 | 1.05  | 5.70E-01 | 2.44E-01 |  |  |
| rs9293775  | chr5 | 78,677,009 | 68  | 311 | 543 | 53  | 331 | 548 | 1.04  | 6.00E-01 | 2.22E-01 |  |  |
| rs7719464  | chr5 | 78,677,083 | 734 | 174 | 14  | 735 | 181 | 16  | 1.05  | 6.90E-01 | 1.61E-01 |  |  |
| rs7732902  | chr5 | 78,697,610 | 896 | 26  | 0   | 910 | 22  | 0   | 0.835 | 6.40E-01 | 1.94E-01 |  |  |
| rs6879014  | chr5 | 78,698,914 | 108 | 391 | 407 | 101 | 381 | 426 | 1.07  | 3.90E-01 | 4.09E-01 |  |  |
| rs11743792 | chr5 | 78,702,269 | 56  | 271 | 594 | 40  | 290 | 599 | 1.06  | 5.30E-01 | 2.76E-01 |  |  |
| rs3822568  | chr5 | 78,706,558 | 388 | 408 | 126 | 397 | 413 | 122 | 0.976 | 7.50E-01 | 1.25E-01 |  |  |
| rs12187625 | chr5 | 78,708,992 | 198 | 422 | 302 | 190 | 428 | 314 | 1.04  | 5.60E-01 | 2.52E-01 |  |  |
| rs6892318  | chr5 | 78,726,789 | 406 | 403 | 113 | 437 | 394 | 101 | 0.908 | 1.80E-01 | 7.45E-01 |  |  |
| rs6868893  | chr5 | 78,727,453 | 112 | 404 | 406 | 101 | 394 | 437 | 1.1   | 1.90E-01 | 7.21E-01 |  |  |
| rs9293779  | chr5 | 78,730,167 | 409 | 400 | 113 | 437 | 395 | 100 | 0.912 | 2.00E-01 | 6.99E-01 |  |  |
| rs6883030  | chr5 | 78,733,431 | 814 | 103 | 5   | 830 | 100 | 2   | 0.905 | 5.20E-01 | 2.84E-01 |  |  |
| rs4455546  | chr5 | 78,746,362 | 9   | 165 | 748 | 8   | 171 | 753 | 0.988 | 9.60E-01 | 1.77E-02 |  |  |
| rs9293780  | chr5 | 78,749,621 | 546 | 309 | 67  | 575 | 310 | 47  | 0.875 | 9.60E-02 | 1.02E+00 |  |  |
| rs4571454  | chr5 | 78,752,383 | 113 | 400 | 409 | 98  | 396 | 438 | 1.1   | 1.70E-01 | 7.70E-01 |  |  |
| rs7719054  | chr5 | 78,764,679 | 626 | 263 | 33  | 633 | 264 | 35  | 1.01  | 9.90E-01 | 4.36E-03 |  |  |
| rs6453450  | chr5 | 78,774,266 | 425 | 381 | 116 | 446 | 392 | 94  | 0.907 | 1.80E-01 | 7.45E-01 |  |  |
| rs10039490 | chr5 | 78,776,686 | 70  | 314 | 538 | 48  | 313 | 570 | 1.16  | 6.10E-02 | 1.21E+00 |  |  |
| rs12514775 | chr5 | 78,780,151 | 22  | 257 | 638 | 33  | 230 | 661 | 1.03  | 7.80E-01 | 1.08E-01 |  |  |
| rs6859667  | chr5 | 78,780,798 | 804 | 67  | 1   | 811 | 81  | 2   | 1.21  | 2.80E-01 | 5.53E-01 |  |  |
| rs12522716 | chr5 | 78,797,532 | 739 | 174 | 9   | 739 | 177 | 16  | 1.09  | 4.60E-01 | 3.37E-01 |  |  |
| rs4323213  | chr5 | 78,799,101 | 283 | 440 | 199 | 311 | 441 | 180 | 0.905 | 1.40E-01 | 8.54E-01 |  |  |
| rs7710089  | chr5 | 78,801,161 | 483 | 346 | 93  | 502 | 364 | 66  | 0.894 | 1.40E-01 | 8.54E-01 |  |  |
| rs5026822  | chr5 | 78,817,691 | 908 | 14  | 0   | 913 | 19  | 0   | 1.35  | 5.00E-01 | 3.01E-01 |  |  |
| rs10942889 | chr5 | 78,820,037 | 307 | 445 | 170 | 320 | 471 | 141 | 0.914 | 1.90E-01 | 7.21E-01 |  |  |
| rs10077726 | chr5 | 78,822,114 | 687 | 207 | 19  | 705 | 202 | 15  | 0.929 | 4.80E-01 | 3.19E-01 |  |  |
| rs12515981 | chr5 | 78,832,093 | 651 | 245 | 26  | 645 | 261 | 26  | 1.05  | 6.00E-01 | 2.22E-01 |  |  |
| rs11948804 | chr5 | 78,839,534 | 7   | 146 | 769 | 6   | 148 | 778 | 1.01  | 9.70E-01 | 1.32E-02 |  |  |
| rs6884494  | chr5 | 78,853,379 | 8   | 143 | 771 | 7   | 152 | 773 | 0.965 | 8.10E-01 | 9.15E-02 |  |  |
| rs12520582 | chr5 | 78,859,690 | 814 | 102 | 6   | 820 | 110 | 2   | 0.989 | 9.90E-01 | 4.36E-03 |  |  |
| rs11746854 | chr5 | 78,864,910 | 599 | 286 | 37  | 583 | 309 | 40  | 1.09  | 3.30E-01 | 4.81E-01 |  |  |
| rs7713917  | chr5 | 78,865,005 | 393 | 406 | 123 | 357 | 451 | 124 | 1.1   | 1.90E-01 | 7.21E-01 |  |  |
| rs7704425  | chr5 | 78,867,260 | 31  | 230 | 661 | 24  | 260 | 648 | 0.95  | 6.00E-01 | 2.22E-01 |  |  |
| rs6899277  | chr5 | 78,881,387 | 373 | 415 | 134 | 347 | 451 | 134 | 1.07  | 3.50E-01 | 4.56E-01 |  |  |
| rs17237492 | chr5 | 78,885,453 | 577 | 298 | 47  | 575 | 310 | 47  | 1.02  | 7.90E-01 | 1.02E-01 |  |  |
| rs11954003 | chr5 | 78,885,918 | 729 | 170 | 19  | 763 | 156 | 11  | 0.828 | 9.00E-02 | 1.05E+00 |  |  |
| rs6894248  | chr5 | 78,889,677 | 106 | 414 | 393 | 111 | 401 | 408 | 1.02  | 8.10E-01 | 9.15E-02 |  |  |
| rs17237849 | chr5 | 78,894,451 | 5   | 135 | 782 | 2   | 141 | 789 | 1.01  | 9.70E-01 | 1.32E-02 |  |  |
| rs17834549 | chr5 | 78,894,534 | 781 | 135 | 5   | 789 | 141 | 2   | 0.987 | 9.60E-01 | 1.77E-02 |  |  |
| rs16876942 | chr5 | 78,896,548 | 799 | 119 | 4   | 796 | 134 | 2   | 1.08  | 5.80E-01 | 2.37E-01 |  |  |
| rs7704901  | chr5 | 78,912,091 | 410 | 384 | 98  | 432 | 380 | 89  | 0.931 | 3.40E-01 | 4.69E-01 |  |  |
| rs11741539 | chr5 | 78,914,135 | 385 | 419 | 118 | 404 | 413 | 115 | 0.956 | 5.40E-01 | 2.68E-01 |  |  |
| rs3829808  | chr5 | 78,945,080 | 747 | 158 | 17  | 785 | 139 | 8   | 0.78  | 3.30E-02 | 1.48E+00 |  |  |
| rs6453465  | chr5 | 78,946,949 | 16  | 135 | 770 | 7   | 113 | 811 | 1.36  | 1.40E-02 | 1.85E+00 |  |  |
| rs3846680  | chr5 | 78,948,599 | 9   | 138 | 775 | 9   | 164 | 759 | 0.854 | 1.90E-01 | 7.21E-01 |  |  |
| rs3828602  | chr5 | 78,951,748 | 774 | 139 | 9   | 759 | 164 | 9   | 1.16  | 2.10E-01 | 6.78E-01 |  |  |
| rs1948764  | chr5 | 78,975,097 | 17  | 158 | 746 | 8   | 138 | 785 | 1.29  | 2.80E-02 | 1.55E+00 |  |  |
| rs16876991 | chr5 | 78,976,539 | 11  | 122 | 789 | 3   | 110 | 819 | 1.28  | 6.80E-02 | 1.17E+00 |  |  |
| rs7712162  | chr5 | 78,980,927 | 41  | 263 | 618 | 34  | 253 | 645 | 1.11  | 2.60E-01 | 5.85E-01 |  |  |
| rs7732613  | chr5 | 78,981,591 | 746 | 159 | 17  | 785 | 139 | 8   | 0.776 | 2.90E-02 | 1.54E+00 |  |  |
| rs6894524  | chr5 | 78,998,969 | 611 | 271 | 38  | 628 | 272 | 32  | 0.946 | 5.40E-01 | 2.68E-01 |  |  |
| rs6877794  | chr5 | 78,999,755 | 75  | 351 | 495 | 67  | 368 | 496 | 1.01  | 9.00E-01 | 4.58E-02 |  |  |
| rs2052476  | chr5 | 79,005,425 | 9   | 139 | 774 | 9   | 163 | 760 | 0.865 | 2.30E-01 | 6.38E-01 |  |  |
| rs3087813  | chr5 | 79,017,306 | 41  | 264 | 610 | 35  | 247 | 632 | 1.11  | 2.40E-01 | 6.20E-01 |  |  |
| rs4704576  | chr5 | 79,025,242 | 241 | 438 | 226 | 236 | 445 | 227 | 1.01  | 8.70E-01 | 6.05E-02 |  |  |

|            |      |            |     |     |     |     |     |     |       |          |          |  |  |
|------------|------|------------|-----|-----|-----|-----|-----|-----|-------|----------|----------|--|--|
| rs7714250  | chr5 | 79,029,240 | 28  | 300 | 594 | 35  | 281 | 616 | 1.03  | 7.40E-01 | 1.31E-01 |  |  |
| rs9784710  | chr5 | 79,030,118 | 23  | 236 | 663 | 20  | 233 | 679 | 1.05  | 6.10E-01 | 2.15E-01 |  |  |
| rs6453473  | chr5 | 79,030,235 | 227 | 450 | 245 | 227 | 466 | 239 | 0.987 | 8.70E-01 | 6.05E-02 |  |  |
| rs11948957 | chr5 | 79,031,166 | 800 | 121 | 1   | 804 | 126 | 2   | 1.05  | 7.60E-01 | 1.19E-01 |  |  |
| rs4441859  | chr5 | 79,032,000 | 435 | 387 | 100 | 435 | 402 | 95  | 0.997 | 9.90E-01 | 4.36E-03 |  |  |
| rs12651804 | chr5 | 79,039,116 | 51  | 306 | 565 | 37  | 329 | 566 | 1.03  | 7.40E-01 | 1.31E-01 |  |  |
| rs1501913  | chr5 | 79,044,743 | 15  | 196 | 711 | 17  | 212 | 703 | 0.919 | 4.20E-01 | 3.77E-01 |  |  |
| rs13170837 | chr5 | 79,048,094 | 386 | 417 | 117 | 385 | 420 | 123 | 1.02  | 7.80E-01 | 1.08E-01 |  |  |
| rs2162805  | chr5 | 79,048,242 | 4   | 109 | 809 | 1   | 101 | 830 | 1.16  | 3.20E-01 | 4.95E-01 |  |  |
| rs13171893 | chr5 | 79,048,957 | 450 | 394 | 78  | 446 | 405 | 81  | 1.03  | 7.20E-01 | 1.43E-01 |  |  |
| rs12518982 | chr5 | 79,053,133 | 585 | 301 | 34  | 568 | 319 | 42  | 1.1   | 2.40E-01 | 6.20E-01 |  |  |
| rs1366271  | chr5 | 79,061,390 | 3   | 129 | 790 | 4   | 130 | 798 | 0.988 | 9.70E-01 | 1.32E-02 |  |  |
| rs4704585  | chr5 | 79,064,228 | 118 | 424 | 380 | 129 | 427 | 376 | 0.959 | 5.70E-01 | 2.44E-01 |  |  |
| rs13158477 | chr5 | 79,064,482 | 648 | 249 | 25  | 665 | 245 | 22  | 0.948 | 5.80E-01 | 2.37E-01 |  |  |
| rs1428224  | chr5 | 79,065,139 | 790 | 129 | 3   | 797 | 130 | 5   | 1.03  | 8.70E-01 | 6.05E-02 |  |  |
| rs16877150 | chr5 | 79,066,094 | 814 | 102 | 3   | 813 | 116 | 3   | 1.12  | 4.40E-01 | 3.57E-01 |  |  |
| rs2278239  | chr5 | 79,069,062 | 790 | 129 | 3   | 797 | 130 | 5   | 1.03  | 8.70E-01 | 6.05E-02 |  |  |
| rs7734306  | chr5 | 79,073,240 | 116 | 416 | 388 | 127 | 423 | 382 | 0.953 | 5.10E-01 | 2.92E-01 |  |  |
| rs12514461 | chr5 | 79,076,813 | 746 | 163 | 13  | 731 | 190 | 11  | 1.12  | 2.90E-01 | 5.38E-01 |  |  |
| rs2115127  | chr5 | 79,077,255 | 3   | 93  | 826 | 3   | 104 | 825 | 0.905 | 5.30E-01 | 2.76E-01 |  |  |
| rs7709188  | chr5 | 79,080,857 | 41  | 313 | 567 | 41  | 318 | 571 | 0.996 | 1.00E+00 | 0.00E+00 |  |  |
| rs1428226  | chr5 | 79,082,171 | 726 | 184 | 11  | 713 | 207 | 10  | 1.1   | 3.60E-01 | 4.44E-01 |  |  |
| rs1366272  | chr5 | 79,084,318 | 10  | 141 | 771 | 12  | 166 | 754 | 0.843 | 1.40E-01 | 8.54E-01 |  |  |
| rs6453481  | chr5 | 79,085,027 | 29  | 251 | 642 | 27  | 280 | 625 | 0.922 | 3.70E-01 | 4.32E-01 |  |  |
| rs259124   | chr5 | 79,089,290 | 74  | 374 | 441 | 86  | 401 | 403 | 0.875 | 7.30E-02 | 1.14E+00 |  |  |
| rs259126   | chr5 | 79,093,233 | 25  | 270 | 627 | 31  | 291 | 610 | 0.899 | 2.30E-01 | 6.38E-01 |  |  |
| rs259128   | chr5 | 79,094,573 | 12  | 194 | 716 | 12  | 217 | 703 | 0.903 | 3.30E-01 | 4.81E-01 |  |  |
| rs259129   | chr5 | 79,095,173 | 622 | 272 | 28  | 606 | 294 | 32  | 1.1   | 2.80E-01 | 5.53E-01 |  |  |
| rs6453482  | chr5 | 79,102,789 | 725 | 182 | 15  | 706 | 211 | 15  | 1.14  | 2.00E-01 | 6.99E-01 |  |  |
| rs109894   | chr5 | 79,103,845 | 93  | 393 | 435 | 105 | 427 | 400 | 0.883 | 8.20E-02 | 1.09E+00 |  |  |
| rs259121   | chr5 | 79,109,985 | 388 | 424 | 108 | 408 | 425 | 99  | 0.941 | 4.00E-01 | 3.98E-01 |  |  |
| rs6453484  | chr5 | 79,117,469 | 585 | 301 | 36  | 629 | 271 | 32  | 0.864 | 8.80E-02 | 1.06E+00 |  |  |
| rs9283795  | chr5 | 79,118,103 | 28  | 273 | 621 | 27  | 253 | 651 | 1.1   | 2.90E-01 | 5.38E-01 |  |  |
| rs1981970  | chr5 | 79,119,531 | 0   | 5   | 917 | 1   | 3   | 927 | 1.01  | 1.00E+00 | 0.00E+00 |  |  |
| rs12657828 | chr5 | 79,121,482 | 700 | 210 | 12  | 693 | 221 | 18  | 1.1   | 3.50E-01 | 4.56E-01 |  |  |
| rs259095   | chr5 | 79,121,753 | 3   | 96  | 823 | 2   | 87  | 843 | 1.14  | 4.10E-01 | 3.87E-01 |  |  |
| rs1129770  | chr5 | 79,122,639 | 28  | 288 | 606 | 24  | 278 | 630 | 1.08  | 3.80E-01 | 4.20E-01 |  |  |
| rs2287672  | chr5 | 79,125,284 | 75  | 378 | 469 | 75  | 412 | 445 | 0.93  | 3.30E-01 | 4.81E-01 |  |  |
| rs259102   | chr5 | 79,128,126 | 19  | 229 | 651 | 28  | 220 | 662 | 0.976 | 8.30E-01 | 8.09E-02 |  |  |
| rs10491460 | chr5 | 79,129,910 | 12  | 127 | 782 | 1   | 125 | 806 | 1.22  | 1.20E-01 | 9.21E-01 |  |  |
| rs10043986 | chr5 | 79,131,173 | 9   | 208 | 705 | 9   | 224 | 699 | 0.936 | 5.40E-01 | 2.68E-01 |  |  |
| rs880179   | chr5 | 79,131,809 | 3   | 137 | 782 | 5   | 141 | 786 | 0.954 | 7.40E-01 | 1.31E-01 |  |  |
| rs259065   | chr5 | 79,136,473 | 472 | 379 | 71  | 494 | 377 | 61  | 0.928 | 3.30E-01 | 4.81E-01 |  |  |
| rs410079   | chr5 | 79,140,777 | 687 | 213 | 22  | 715 | 203 | 14  | 0.874 | 1.80E-01 | 7.45E-01 |  |  |
| rs17405909 | chr5 | 79,141,263 | 19  | 214 | 689 | 15  | 228 | 689 | 0.985 | 9.10E-01 | 4.10E-02 |  |  |
| rs11957025 | chr5 | 79,142,558 | 510 | 338 | 74  | 523 | 349 | 59  | 0.935 | 4.00E-01 | 3.98E-01 |  |  |
| rs13185886 | chr5 | 79,144,232 | 500 | 354 | 66  | 507 | 355 | 69  | 1     | 9.90E-01 | 4.36E-03 |  |  |
| rs259069   | chr5 | 79,146,816 | 32  | 272 | 618 | 23  | 254 | 655 | 1.16  | 9.40E-02 | 1.03E+00 |  |  |
| rs9293789  | chr5 | 79,151,418 | 240 | 470 | 212 | 257 | 449 | 226 | 0.994 | 9.60E-01 | 1.77E-02 |  |  |
| rs12514281 | chr5 | 79,155,672 | 13  | 177 | 732 | 7   | 171 | 754 | 1.12  | 3.10E-01 | 5.09E-01 |  |  |
| rs1864035  | chr5 | 79,156,238 | 456 | 374 | 92  | 433 | 390 | 109 | 1.12  | 1.30E-01 | 8.86E-01 |  |  |
| rs7707140  | chr5 | 79,156,553 | 1   | 34  | 887 | 0   | 36  | 895 | 1.01  | 9.40E-01 | 2.69E-02 |  |  |
| rs1529457  | chr5 | 79,165,288 | 108 | 435 | 379 | 120 | 428 | 384 | 0.977 | 7.60E-01 | 1.19E-01 |  |  |
| rs7380910  | chr5 | 79,168,637 | 300 | 472 | 150 | 288 | 479 | 165 | 1.06  | 3.60E-01 | 4.44E-01 |  |  |
| rs259074   | chr5 | 79,168,663 | 159 | 439 | 324 | 147 | 450 | 335 | 1.05  | 5.00E-01 | 3.01E-01 |  |  |
| rs1560130  | chr5 | 79,169,526 | 755 | 164 | 2   | 787 | 140 | 4   | 0.86  | 2.20E-01 | 6.58E-01 |  |  |
| rs2404666  | chr5 | 79,170,973 | 76  | 401 | 444 | 67  | 397 | 468 | 1.08  | 3.20E-01 | 4.95E-01 |  |  |
| rs265009   | chr5 | 79,173,312 | 392 | 421 | 109 | 421 | 421 | 90  | 0.897 | 1.30E-01 | 8.86E-01 |  |  |
| rs918416   | chr5 | 79,177,077 | 46  | 301 | 575 | 48  | 319 | 565 | 0.946 | 5.10E-01 | 2.92E-01 |  |  |
| rs10056632 | chr5 | 79,177,947 | 407 | 417 | 98  | 405 | 412 | 115 | 1.06  | 4.60E-01 | 3.37E-01 |  |  |
| rs149767   | chr5 | 79,191,335 | 54  | 380 | 460 | 55  | 358 | 484 | 1.06  | 4.40E-01 | 3.57E-01 |  |  |
| rs265002   | chr5 | 79,194,908 | 271 | 463 | 187 | 280 | 479 | 173 | 0.953 | 4.90E-01 | 3.10E-01 |  |  |
| rs9293792  | chr5 | 79,195,244 | 586 | 282 | 36  | 567 | 300 | 44  | 1.11  | 2.10E-01 | 6.78E-01 |  |  |
| rs264999   | chr5 | 79,196,191 | 491 | 366 | 65  | 545 | 333 | 54  | 0.842 | 2.60E-02 | 1.59E+00 |  |  |
| rs10942906 | chr5 | 79,196,242 | 577 | 315 | 30  | 591 | 304 | 37  | 0.996 | 1.00E+00 | 0.00E+00 |  |  |
| rs10942907 | chr5 | 79,197,259 | 577 | 315 | 30  | 591 | 304 | 37  | 0.996 | 1.00E+00 | 0.00E+00 |  |  |
| rs264989   | chr5 | 79,202,743 | 376 | 413 | 106 | 354 | 425 | 120 | 1.09  | 2.10E-01 | 6.78E-01 |  |  |
| rs264985   | chr5 | 79,206,357 | 426 | 410 | 86  | 465 | 385 | 82  | 0.905 | 1.70E-01 | 7.70E-01 |  |  |
| rs264984   | chr5 | 79,206,450 | 433 | 409 | 80  | 471 | 382 | 79  | 0.914 | 2.20E-01 | 6.58E-01 |  |  |
| rs265005   | chr5 | 79,207,892 | 482 | 385 | 55  | 500 | 373 | 59  | 0.975 | 7.60E-01 | 1.19E-01 |  |  |

|            |      |            |     |     |     |     |     |     |       |          |          |  |  |
|------------|------|------------|-----|-----|-----|-----|-----|-----|-------|----------|----------|--|--|
| rs10474594 | chr5 | 79,209,277 | 362 | 443 | 117 | 363 | 420 | 149 | 1.08  | 2.70E-01 | 5.69E-01 |  |  |
| rs10491455 | chr5 | 79,209,893 | 585 | 310 | 27  | 590 | 307 | 35  | 1.03  | 7.40E-01 | 1.31E-01 |  |  |
| rs171941   | chr5 | 79,215,882 | 114 | 443 | 365 | 110 | 437 | 385 | 1.05  | 4.90E-01 | 3.10E-01 |  |  |
| rs265008   | chr5 | 79,217,223 | 212 | 432 | 278 | 206 | 479 | 247 | 0.946 | 4.20E-01 | 3.77E-01 |  |  |
| rs10514162 | chr5 | 79,222,565 | 51  | 376 | 495 | 62  | 345 | 525 | 1.04  | 6.20E-01 | 2.08E-01 |  |  |
| rs10514161 | chr5 | 79,222,927 | 635 | 256 | 31  | 620 | 279 | 33  | 1.09  | 3.40E-01 | 4.69E-01 |  |  |
| rs11745574 | chr5 | 79,223,631 | 635 | 256 | 31  | 620 | 279 | 33  | 1.09  | 3.40E-01 | 4.69E-01 |  |  |
| rs4704601  | chr5 | 79,223,813 | 256 | 485 | 181 | 265 | 476 | 191 | 1     | 9.80E-01 | 8.77E-03 |  |  |
| rs4704604  | chr5 | 79,227,458 | 472 | 372 | 77  | 467 | 387 | 78  | 1.03  | 7.30E-01 | 1.37E-01 |  |  |
| rs13170399 | chr5 | 79,242,826 | 157 | 473 | 291 | 165 | 484 | 281 | 0.959 | 5.50E-01 | 2.60E-01 |  |  |
| rs1565513  | chr5 | 79,252,657 | 211 | 449 | 258 | 222 | 447 | 258 | 0.976 | 7.30E-01 | 1.37E-01 |  |  |
| rs13171934 | chr5 | 79,254,754 | 543 | 340 | 39  | 550 | 324 | 58  | 1.05  | 5.20E-01 | 2.84E-01 |  |  |
| rs1490953  | chr5 | 79,256,899 | 487 | 378 | 56  | 509 | 373 | 50  | 0.938 | 4.20E-01 | 3.77E-01 |  |  |
| rs12521286 | chr5 | 79,258,951 | 35  | 312 | 575 | 45  | 300 | 587 | 0.988 | 9.10E-01 | 4.10E-02 |  |  |
| rs10755302 | chr5 | 79,261,182 | 860 | 58  | 4   | 880 | 52  | 0   | 0.773 | 2.00E-01 | 6.99E-01 |  |  |
| rs6865146  | chr5 | 79,264,026 | 233 | 468 | 221 | 249 | 453 | 230 | 0.985 | 8.50E-01 | 7.06E-02 |  |  |
| rs12658005 | chr5 | 79,264,275 | 15  | 196 | 711 | 12  | 196 | 724 | 1.04  | 7.10E-01 | 1.49E-01 |  |  |
| rs6453492  | chr5 | 79,264,405 | 142 | 420 | 360 | 166 | 400 | 366 | 0.955 | 5.20E-01 | 2.84E-01 |  |  |
| rs7707589  | chr5 | 79,268,812 | 27  | 249 | 611 | 27  | 250 | 624 | 1.02  | 9.00E-01 | 4.58E-02 |  |  |
| rs7712567  | chr5 | 79,273,243 | 195 | 486 | 240 | 203 | 456 | 267 | 1.04  | 5.60E-01 | 2.52E-01 |  |  |
| rs4535437  | chr5 | 79,278,419 | 542 | 325 | 55  | 545 | 332 | 55  | 1.01  | 9.60E-01 | 1.77E-02 |  |  |
| rs10805929 | chr5 | 79,280,778 | 52  | 334 | 536 | 71  | 303 | 558 | 0.993 | 9.60E-01 | 1.77E-02 |  |  |
| rs1032342  | chr5 | 79,287,099 | 267 | 477 | 178 | 314 | 426 | 192 | 0.933 | 3.10E-01 | 5.09E-01 |  |  |
| rs2404710  | chr5 | 79,292,318 | 153 | 456 | 313 | 162 | 454 | 316 | 0.983 | 8.20E-01 | 8.62E-02 |  |  |
| rs4576130  | chr5 | 79,295,781 | 200 | 450 | 270 | 200 | 452 | 280 | 1.02  | 7.90E-01 | 1.02E-01 |  |  |
| rs6453494  | chr5 | 79,295,975 | 338 | 458 | 126 | 378 | 398 | 156 | 0.983 | 8.20E-01 | 8.62E-02 |  |  |
| rs11749003 | chr5 | 79,297,740 | 677 | 226 | 19  | 668 | 242 | 22  | 1.08  | 4.00E-01 | 3.98E-01 |  |  |
| rs1017998  | chr5 | 79,298,967 | 131 | 465 | 326 | 162 | 399 | 371 | 1.03  | 7.20E-01 | 1.43E-01 |  |  |
| rs17196895 | chr5 | 79,317,968 | 803 | 114 | 5   | 822 | 105 | 5   | 0.912 | 5.30E-01 | 2.76E-01 |  |  |
| rs1438739  | chr5 | 79,324,751 | 129 | 468 | 325 | 164 | 397 | 371 | 1.02  | 7.90E-01 | 1.02E-01 |  |  |
| rs7707036  | chr5 | 79,328,655 | 264 | 461 | 193 | 298 | 426 | 207 | 0.96  | 5.60E-01 | 2.52E-01 |  |  |
| rs383122   | chr5 | 79,334,610 | 17  | 204 | 700 | 19  | 184 | 728 | 1.1   | 3.80E-01 | 4.20E-01 |  |  |
| rs12332358 | chr5 | 79,341,737 | 580 | 295 | 46  | 548 | 346 | 38  | 1.1   | 2.50E-01 | 6.02E-01 |  |  |
| rs2451933  | chr5 | 79,342,355 | 31  | 298 | 593 | 35  | 257 | 640 | 1.14  | 1.30E-01 | 8.86E-01 |  |  |
| rs6878264  | chr5 | 79,343,508 | 17  | 251 | 653 | 24  | 231 | 675 | 1.04  | 7.20E-01 | 1.43E-01 |  |  |
| rs2028269  | chr5 | 79,344,071 | 140 | 466 | 316 | 152 | 446 | 334 | 1.01  | 9.20E-01 | 3.62E-02 |  |  |
| rs2118731  | chr5 | 79,353,345 | 208 | 498 | 215 | 237 | 448 | 247 | 1.01  | 9.50E-01 | 2.23E-02 |  |  |
| rs385771   | chr5 | 79,356,433 | 601 | 291 | 30  | 647 | 249 | 36  | 0.885 | 1.60E-01 | 7.96E-01 |  |  |
| rs16877442 | chr5 | 79,380,374 | 757 | 155 | 9   | 762 | 164 | 6   | 1.01  | 1.00E+00 | 0.00E+00 |  |  |
| rs404375   | chr5 | 79,384,515 | 214 | 506 | 202 | 240 | 459 | 233 | 1.01  | 8.90E-01 | 5.06E-02 |  |  |
| rs401302   | chr5 | 79,391,227 | 34  | 290 | 593 | 37  | 259 | 631 | 1.11  | 2.40E-01 | 6.20E-01 |  |  |
| rs443095   | chr5 | 79,398,306 | 1   | 51  | 870 | 0   | 30  | 902 | 1.81  | 1.30E-02 | 1.89E+00 |  |  |
| rs4703797  | chr5 | 79,400,765 | 427 | 403 | 92  | 416 | 416 | 100 | 1.06  | 4.50E-01 | 3.47E-01 |  |  |
| rs1465853  | chr5 | 79,400,841 | 912 | 10  | 0   | 917 | 15  | 0   | 1.49  | 4.40E-01 | 3.57E-01 |  |  |
| rs256438   | chr5 | 79,402,005 | 355 | 456 | 110 | 376 | 444 | 112 | 0.963 | 6.10E-01 | 2.15E-01 |  |  |
| rs13167730 | chr5 | 79,406,003 | 8   | 177 | 737 | 6   | 160 | 766 | 1.15  | 2.30E-01 | 6.38E-01 |  |  |
| rs2288394  | chr5 | 79,409,559 | 44  | 368 | 510 | 58  | 332 | 542 | 1.04  | 6.50E-01 | 1.87E-01 |  |  |
| rs10514175 | chr5 | 79,411,987 | 99  | 410 | 412 | 105 | 419 | 408 | 0.967 | 6.60E-01 | 1.80E-01 |  |  |
| rs2247450  | chr5 | 79,417,552 | 257 | 501 | 162 | 293 | 452 | 185 | 0.974 | 7.20E-01 | 1.43E-01 |  |  |
| rs2118732  | chr5 | 79,419,032 | 14  | 225 | 679 | 25  | 210 | 689 | 0.976 | 8.40E-01 | 7.57E-02 |  |  |
| rs2438642  | chr5 | 79,424,501 | 342 | 454 | 126 | 379 | 416 | 137 | 0.947 | 4.50E-01 | 3.47E-01 |  |  |
| rs2438632  | chr5 | 79,427,949 | 121 | 464 | 337 | 143 | 444 | 345 | 0.964 | 6.10E-01 | 2.15E-01 |  |  |
| rs16877483 | chr5 | 79,428,859 | 7   | 188 | 727 | 14  | 178 | 740 | 0.99  | 9.70E-01 | 1.32E-02 |  |  |
| rs2438631  | chr5 | 79,428,900 | 217 | 451 | 254 | 204 | 467 | 261 | 1.04  | 5.40E-01 | 2.68E-01 |  |  |
| rs425491   | chr5 | 79,431,585 | 454 | 374 | 94  | 460 | 383 | 89  | 0.982 | 8.30E-01 | 8.09E-02 |  |  |
| rs1465852  | chr5 | 79,432,499 | 372 | 413 | 137 | 369 | 421 | 142 | 1.02  | 7.50E-01 | 1.25E-01 |  |  |
| rs2434292  | chr5 | 79,434,150 | 256 | 467 | 199 | 257 | 463 | 212 | 1.03  | 7.00E-01 | 1.55E-01 |  |  |
| rs6865426  | chr5 | 79,434,465 | 18  | 258 | 646 | 14  | 247 | 671 | 1.1   | 3.40E-01 | 4.69E-01 |  |  |
| rs2438625  | chr5 | 79,434,480 | 91  | 362 | 469 | 82  | 373 | 477 | 1.03  | 6.70E-01 | 1.74E-01 |  |  |
| rs2099651  | chr5 | 79,434,667 | 192 | 471 | 259 | 207 | 464 | 261 | 0.971 | 6.80E-01 | 1.67E-01 |  |  |
| rs2015459  | chr5 | 79,436,534 | 70  | 385 | 466 | 67  | 365 | 500 | 1.09  | 2.50E-01 | 6.02E-01 |  |  |
| rs726436   | chr5 | 79,436,687 | 2   | 124 | 796 | 10  | 129 | 793 | 0.859 | 2.50E-01 | 6.02E-01 |  |  |
| rs6862233  | chr5 | 79,437,046 | 466 | 386 | 70  | 500 | 366 | 66  | 0.913 | 2.30E-01 | 6.38E-01 |  |  |
| rs421837   | chr5 | 79,437,173 | 57  | 332 | 533 | 63  | 346 | 523 | 0.941 | 4.50E-01 | 3.47E-01 |  |  |
| rs6863009  | chr5 | 79,437,447 | 769 | 143 | 10  | 801 | 120 | 11  | 0.85  | 2.00E-01 | 6.99E-01 |  |  |
| rs4704608  | chr5 | 79,437,992 | 2   | 121 | 799 | 7   | 129 | 796 | 0.875 | 3.20E-01 | 4.95E-01 |  |  |
| rs4704609  | chr5 | 79,438,199 | 19  | 248 | 655 | 15  | 239 | 678 | 1.09  | 3.80E-01 | 4.20E-01 |  |  |
| rs4704610  | chr5 | 79,447,004 | 33  | 294 | 595 | 32  | 288 | 612 | 1.04  | 6.50E-01 | 1.87E-01 |  |  |
| rs10474010 | chr5 | 79,447,199 | 26  | 287 | 609 | 34  | 283 | 615 | 0.971 | 7.60E-01 | 1.19E-01 |  |  |
| rs4703798  | chr5 | 79,448,084 | 352 | 433 | 137 | 374 | 439 | 119 | 0.917 | 2.20E-01 | 6.58E-01 |  |  |

|            |      |            |     |     |     |     |     |     |       |          |          |  |  |
|------------|------|------------|-----|-----|-----|-----|-----|-----|-------|----------|----------|--|--|
| rs13328157 | chr5 | 79,453,334 | 841 | 79  | 1   | 844 | 82  | 6   | 1.15  | 4.00E-01 | 3.98E-01 |  |  |
| rs439274   | chr5 | 79,454,132 | 27  | 248 | 647 | 26  | 256 | 650 | 0.989 | 9.40E-01 | 2.69E-02 |  |  |
| rs10474608 | chr5 | 79,457,936 | 632 | 261 | 29  | 648 | 262 | 22  | 0.939 | 5.00E-01 | 3.01E-01 |  |  |
| rs1470025  | chr5 | 79,458,185 | 426 | 392 | 104 | 437 | 409 | 86  | 0.939 | 3.90E-01 | 4.09E-01 |  |  |
| rs11950944 | chr5 | 79,458,749 | 367 | 420 | 130 | 338 | 446 | 141 | 1.1   | 1.70E-01 | 7.70E-01 |  |  |
| rs10057542 | chr5 | 79,459,103 | 11  | 142 | 767 | 7   | 147 | 777 | 1.03  | 8.20E-01 | 8.62E-02 |  |  |
| rs10072008 | chr5 | 79,471,439 | 12  | 178 | 732 | 11  | 194 | 727 | 0.939 | 5.80E-01 | 2.37E-01 |  |  |
| rs4704618  | chr5 | 79,473,085 | 304 | 445 | 173 | 296 | 460 | 176 | 1.03  | 7.10E-01 | 1.49E-01 |  |  |
| rs4704619  | chr5 | 79,473,195 | 104 | 394 | 424 | 90  | 403 | 439 | 1.07  | 3.90E-01 | 4.09E-01 |  |  |
| rs7707754  | chr5 | 79,474,682 | 46  | 326 | 550 | 45  | 341 | 546 | 0.975 | 7.70E-01 | 1.14E-01 |  |  |
| rs7712447  | chr5 | 79,478,925 | 27  | 264 | 631 | 24  | 288 | 620 | 0.948 | 5.60E-01 | 2.52E-01 |  |  |
| rs1132801  | chr5 | 79,496,866 | 658 | 235 | 29  | 654 | 256 | 22  | 1.02  | 9.00E-01 | 4.58E-02 |  |  |
| rs6893475  | chr5 | 79,496,911 | 539 | 331 | 52  | 537 | 346 | 49  | 1.01  | 9.00E-01 | 4.58E-02 |  |  |
| rs13176625 | chr5 | 79,498,278 | 530 | 315 | 77  | 525 | 342 | 65  | 0.994 | 9.70E-01 | 1.32E-02 |  |  |
| rs7721370  | chr5 | 79,501,959 | 55  | 286 | 581 | 45  | 335 | 551 | 0.925 | 3.40E-01 | 4.69E-01 |  |  |
| rs11959429 | chr5 | 79,505,285 | 612 | 266 | 44  | 594 | 297 | 39  | 1.06  | 4.90E-01 | 3.10E-01 |  |  |
| rs13186313 | chr5 | 79,505,787 | 530 | 321 | 69  | 506 | 357 | 66  | 1.07  | 3.60E-01 | 4.44E-01 |  |  |
| rs10050980 | chr5 | 79,507,139 | 106 | 416 | 400 | 92  | 412 | 428 | 1.1   | 1.90E-01 | 7.21E-01 |  |  |
| rs6890275  | chr5 | 79,509,042 | 33  | 215 | 673 | 24  | 248 | 659 | 0.952 | 6.20E-01 | 2.08E-01 |  |  |
| rs4704624  | chr5 | 79,516,376 | 182 | 463 | 274 | 163 | 468 | 299 | 1.1   | 1.70E-01 | 7.70E-01 |  |  |
| rs4704627  | chr5 | 79,523,947 | 97  | 405 | 420 | 104 | 411 | 417 | 0.968 | 6.60E-01 | 1.80E-01 |  |  |
| rs4704629  | chr5 | 79,527,619 | 392 | 405 | 125 | 375 | 438 | 119 | 1.03  | 6.60E-01 | 1.80E-01 |  |  |
| rs6876176  | chr5 | 79,531,212 | 73  | 356 | 492 | 73  | 385 | 474 | 0.94  | 4.20E-01 | 3.77E-01 |  |  |
| rs4704633  | chr5 | 79,532,695 | 13  | 197 | 712 | 12  | 201 | 719 | 1     | 9.80E-01 | 8.77E-03 |  |  |
| rs4704635  | chr5 | 79,533,089 | 179 | 452 | 284 | 177 | 472 | 283 | 0.998 | 1.00E+00 | 0.00E+00 |  |  |
| rs12519047 | chr5 | 79,533,936 | 13  | 198 | 711 | 11  | 203 | 718 | 1.01  | 9.80E-01 | 8.77E-03 |  |  |
| rs6868932  | chr5 | 79,535,251 | 15  | 172 | 735 | 8   | 174 | 750 | 1.08  | 4.80E-01 | 3.19E-01 |  |  |
| rs6880905  | chr5 | 79,537,571 | 14  | 154 | 754 | 7   | 161 | 764 | 1.06  | 6.60E-01 | 1.80E-01 |  |  |
| rs13188069 | chr5 | 79,540,445 | 27  | 205 | 690 | 17  | 223 | 692 | 1.02  | 8.60E-01 | 6.55E-02 |  |  |
| rs17259420 | chr5 | 79,541,813 | 37  | 247 | 638 | 22  | 265 | 644 | 1.06  | 5.40E-01 | 2.68E-01 |  |  |
| rs6872447  | chr5 | 79,542,950 | 76  | 347 | 499 | 61  | 364 | 507 | 1.05  | 5.20E-01 | 2.84E-01 |  |  |
| rs10068511 | chr5 | 79,545,051 | 41  | 234 | 647 | 29  | 269 | 634 | 0.972 | 7.80E-01 | 1.08E-01 |  |  |
| rs10036776 | chr5 | 79,545,730 | 105 | 371 | 442 | 83  | 426 | 419 | 0.988 | 9.00E-01 | 4.58E-02 |  |  |
| rs6863905  | chr5 | 79,547,228 | 707 | 195 | 20  | 715 | 201 | 15  | 0.97  | 7.90E-01 | 1.02E-01 |  |  |
| rs6895353  | chr5 | 79,550,431 | 367 | 407 | 148 | 344 | 458 | 130 | 1.02  | 8.30E-01 | 8.09E-02 |  |  |
| rs7711197  | chr5 | 79,552,682 | 14  | 165 | 743 | 7   | 170 | 755 | 1.07  | 5.90E-01 | 2.29E-01 |  |  |
| rs13355369 | chr5 | 79,554,034 | 190 | 414 | 318 | 175 | 458 | 299 | 0.988 | 8.90E-01 | 5.06E-02 |  |  |
| rs4704641  | chr5 | 79,557,262 | 190 | 414 | 318 | 175 | 459 | 298 | 0.986 | 8.60E-01 | 6.55E-02 |  |  |
| rs7726099  | chr5 | 79,557,460 | 320 | 411 | 190 | 314 | 445 | 173 | 0.979 | 7.80E-01 | 1.08E-01 |  |  |
| rs13355153 | chr5 | 79,558,361 | 45  | 232 | 645 | 31  | 275 | 626 | 0.959 | 6.50E-01 | 1.87E-01 |  |  |
| rs12522787 | chr5 | 79,562,102 | 19  | 216 | 686 | 20  | 216 | 696 | 1     | 1.00E+00 | 0.00E+00 |  |  |
| rs16877647 | chr5 | 79,566,062 | 17  | 228 | 676 | 15  | 221 | 696 | 1.07  | 5.30E-01 | 2.76E-01 |  |  |
| rs17200856 | chr5 | 79,568,000 | 34  | 234 | 654 | 24  | 264 | 644 | 0.974 | 8.00E-01 | 9.69E-02 |  |  |
| rs12189352 | chr5 | 79,570,857 | 318 | 439 | 165 | 297 | 450 | 184 | 1.1   | 1.80E-01 | 7.45E-01 |  |  |
| rs2279772  | chr5 | 79,571,190 | 11  | 196 | 715 | 5   | 178 | 749 | 1.2   | 1.00E-01 | 1.00E+00 |  |  |
| rs1010809  | chr5 | 79,578,880 | 23  | 236 | 661 | 23  | 237 | 672 | 1.01  | 9.40E-01 | 2.69E-02 |  |  |
| rs881708   | chr5 | 79,585,440 | 118 | 411 | 393 | 105 | 425 | 402 | 1.05  | 5.40E-01 | 2.68E-01 |  |  |
| rs1126176  | chr5 | 79,587,940 | 113 | 431 | 378 | 122 | 450 | 360 | 0.933 | 3.30E-01 | 4.81E-01 |  |  |
| rs6872359  | chr5 | 79,600,641 | 72  | 364 | 448 | 61  | 349 | 486 | 1.13  | 1.10E-01 | 9.59E-01 |  |  |
| rs13190128 | chr5 | 79,600,702 | 731 | 176 | 10  | 731 | 189 | 9   | 1.05  | 7.00E-01 | 1.55E-01 |  |  |
| rs9293809  | chr5 | 79,600,827 | 361 | 424 | 134 | 356 | 427 | 147 | 1.05  | 5.10E-01 | 2.92E-01 |  |  |
| rs10053040 | chr5 | 79,603,167 | 674 | 227 | 21  | 660 | 255 | 17  | 1.07  | 4.60E-01 | 3.37E-01 |  |  |
| rs950788   | chr5 | 79,613,516 | 340 | 413 | 169 | 330 | 440 | 162 | 1.01  | 9.00E-01 | 4.58E-02 |  |  |
| rs2173676  | chr5 | 79,614,553 | 522 | 342 | 54  | 490 | 376 | 63  | 1.14  | 8.80E-02 | 1.06E+00 |  |  |
| rs4704655  | chr5 | 79,616,574 | 703 | 161 | 21  | 720 | 170 | 16  | 0.968 | 8.00E-01 | 9.69E-02 |  |  |
| rs9293811  | chr5 | 79,621,841 | 735 | 173 | 14  | 723 | 201 | 8   | 1.08  | 5.10E-01 | 2.92E-01 |  |  |
| rs6886552  | chr5 | 79,626,430 | 19  | 251 | 652 | 20  | 212 | 700 | 1.19  | 7.00E-02 | 1.15E+00 |  |  |
| rs11738136 | chr5 | 79,634,345 | 100 | 422 | 400 | 86  | 402 | 444 | 1.14  | 6.00E-02 | 1.22E+00 |  |  |
| rs10074004 | chr5 | 79,634,402 | 465 | 358 | 98  | 425 | 423 | 84  | 1.08  | 3.00E-01 | 5.23E-01 |  |  |
| rs10054927 | chr5 | 79,636,264 | 28  | 215 | 678 | 23  | 268 | 641 | 0.852 | 8.30E-02 | 1.08E+00 |  |  |
| rs4499817  | chr5 | 79,636,281 | 115 | 434 | 373 | 128 | 443 | 361 | 0.938 | 3.60E-01 | 4.44E-01 |  |  |
| rs4998063  | chr5 | 79,636,449 | 183 | 473 | 261 | 165 | 444 | 319 | 1.18  | 1.50E-02 | 1.82E+00 |  |  |
| rs10805934 | chr5 | 79,639,464 | 212 | 441 | 268 | 183 | 490 | 256 | 1.04  | 6.10E-01 | 2.15E-01 |  |  |
| rs10056190 | chr5 | 79,646,769 | 284 | 453 | 185 | 272 | 478 | 181 | 1.02  | 7.90E-01 | 1.02E-01 |  |  |
| rs7720696  | chr5 | 79,647,944 | 421 | 386 | 111 | 391 | 441 | 98  | 1.05  | 4.90E-01 | 3.10E-01 |  |  |
| rs1500138  | chr5 | 79,649,697 | 113 | 387 | 422 | 98  | 440 | 394 | 0.961 | 6.00E-01 | 2.22E-01 |  |  |
| rs11744364 | chr5 | 79,651,345 | 51  | 318 | 553 | 37  | 337 | 558 | 1.04  | 6.20E-01 | 2.08E-01 |  |  |
| rs16876315 | chr5 | 79,653,113 | 670 | 232 | 20  | 665 | 253 | 14  | 1.03  | 8.20E-01 | 8.62E-02 |  |  |
| rs10060273 | chr5 | 79,654,405 | 20  | 219 | 683 | 16  | 196 | 720 | 1.17  | 1.10E-01 | 9.59E-01 |  |  |
| rs2405378  | chr5 | 79,658,228 | 40  | 322 | 560 | 40  | 295 | 597 | 1.11  | 2.20E-01 | 6.58E-01 |  |  |
